# Supplementary material
Source: publisher figshare collection journal article supplement (https://tandf.figshare.com/articles/dataset/_/12851423)
Supplement: Supplementary file 1 [file 3]

## Sheet: comment
UCSC genome browser
http://genome.ucsc.edu/cgi-bin/hgTracks?hgS_doOtherUser=submit&hgS_otherUserName=lwcbio&hgS_otherUserSessionName=hg19_Manley_U87
Format for 3'READS report
1. APA_list: All regulated polyA sites (each row is a pA, sorted by Max_APA_SS); Gene expression change information is also shown;
Gene_sym: Gene symbol
Gene_type: Gene type (mRNA or lncRNA, long non-coding RNA)
Chr: Chromosome ID
Str: Strand of transcription
pA_pos: PolyA site position in genome
pA_type: polyA site type (in 3'most exon: F, first; M, middle; L, last; S, single. In upstream region: Ic, intronic composite terminal exon; Is, intronic skipped terminal exon; E, exonic; UA, TSS upstream antisense)
PAS: polyA signal type (AATAAA; ATTAAA; OtherPAS, A[A/T]TAAA varients; Arich, A-rich sequence; NoPAS, no PAS)
Isoform_abn: APA isoform abundance at reference sample
Delta_abn: Change of APA isoform abundance relative to reference ( %)
APA_SS: Significance score for APA regulation; -S*log10(P-value),S = 1 for up-regulation or =-1 for down-regulation, Fisher's Exact test
Max_APA_SS: The maximum SS value for APA isoform change SS
Gene_RPM: Gene Reads Per Million value of reference sample based on 3'READS, representing gene expression level.
Gene_FC: Gene expression fold change based on 3'READS (compare to reference sample, positive value for up-regulation and minus value for down-regulation).
Gene_SS: Significance score for gene expression regulation; -S*log10(P-value),S = 1 for up-regulation or =-1 for down-regulation, Fisher's Exact test
Gene_desc: Gene description
For SS, NA indicates no statistical test; +/-999 indicate P-value beyond the limits of program
For FC, +/-999 indicates infinite values

## Sheet: APA-list
Gene_sym	Gene_type	Gene_id	Transcript	Chr	Str	pA_pos	pA_type	PAS	Isoform_abn_U87	Delta_abn_SETX_U87	APA_SS_SETX_U87	Max_APA_SS	Gene_desc	Gene_RPM_U87	Gene_FC_SETX_U87	Gene_SS_SETX_U87	Num_pA	Max_Gene_SS
NME1-NME2	mRNA	654364	NM_001018136	chr17	+	49239396	Is	ATTAAA	79.3	9.7	30.2	95.9	NME1-NME2 readthrough	2574.74	1.1	1.5	1	999
ORAI1	mRNA	84876	NM_032790	chr12	+	122079941	F	OtherPAS	38	-3	-0.2	55.8	ORAI calcium release-activated calcium modulator 1	90.539	1.9	8.9	2	8.9
ORAI1	mRNA	84876	NM_032790	chr12	+	122081015	L	AATAAA	62	3	0.2	55.8	ORAI calcium release-activated calcium modulator 1	90.539	1.9	8.9	2	8.9
TFPI2	mRNA	7980	NM_006528	chr7	-	93515859	F	OtherPAS	67.6	-22.8	-7.1	54.2	tissue factor pathway inhibitor 2	154.888	1.7	9.6	4	999
PCBP2	mRNA	5094	NM_005016	chr12	+	53873617	M	OtherPAS	13.6	9.1	9.8	53	poly(rC) binding protein 2	1216.66	-1.4	-18.5	5	38.9
PRKAR1A	mRNA	5573	NM_212472	chr17	+	66526806	F	AATAAA	94.5	-2	-1.9	50.1	protein kinase, cAMP-dependent, regulatory, type I, alpha (tissue specific extinguisher 1)	1700.78	-1.5	-37.8	2	37.8
PRKAR1A	mRNA	5573	NM_212472	chr17	+	66528903	L	AATAAA	5.5	2	1.9	50.1	protein kinase, cAMP-dependent, regulatory, type I, alpha (tissue specific extinguisher 1)	1700.78	-1.5	-37.8	2	37.8
OAZ1	mRNA	4946	NM_004152	chr19	+	2273324	M	AATAAA	14.6	0.2	0	49	ornithine decarboxylase antizyme 1	794.645	1.4	13.7	3	263.5
OAZ1	mRNA	4946	NM_004152	chr19	+	2273240	F	AATAAA	68.9	-0.3	0	44.1	ornithine decarboxylase antizyme 1	794.645	1.4	13.7	3	263.5
PSAP	mRNA	5660	NM_001042465	chr10	-	73576306	F	AATAAA	72.7	-6.5	-1.8	40.6	prosaposin	477.386	-1.2	-3.4	3	97.3
LARP6	mRNA	55323	NM_018357	chr15	-	71143773	Is	AATAAA	65	-28.8	-1.4	38.3	La ribonucleoprotein domain family, member 6	14.965	2.1	2.3	3	14.1
PHLDA1	mRNA	22822	NM_007350	chr12	-	76419231	L	AATAAA	9.5	3.8	0.2	38.1	pleckstrin homology-like domain, family A, member 1	47.14	1.1	0.1	7	6.1
PCBP2	mRNA	5094	NM_005016	chr12	+	53874592	L	OtherPAS	52.2	-21.3	-30.5	37.9	poly(rC) binding protein 2	1216.66	-1.4	-18.5	5	38.9
PSAP	mRNA	5660	NM_001042465	chr10	-	73576055	L	AATAAA	17.2	0.5	0.1	36.6	prosaposin	477.386	-1.2	-3.4	3	97.3
EFHD2	mRNA	79180	NM_024329	chr1	+	15755341	F	OtherPAS	23.8	33.3	35.4	35.4	EF-hand domain family, member D2	574.658	-1.4	-10.7	3	228.3
PCMT1	mRNA	5110	NM_005389	chr6	+	150132557	L	AATAAA	51.8	7.3	0.4	34.4	protein-L-isoaspartate (D-aspartate) O-methyltransferase	41.902	1.4	1.4	3	1.4
SERP1	mRNA	27230	NM_014445	chr3	-	150262005	F	AATAAA	89.7	-23.6	-10.6	32.4	stress-associated endoplasmic reticulum protein 1	173.595	1.4	4.1	2	4.6
SERP1	mRNA	27230	NM_014445	chr3	-	150259785	L	ATTAAA	10.3	23.6	10.6	32.4	stress-associated endoplasmic reticulum protein 1	173.595	1.4	4.1	2	4.6
SCG5	mRNA	6447	NM_001144757	chr15	+	32989293	L	AATAAA	82.7	7.8	1.3	31.6	secretogranin V (7B2 protein)	95.028	1.3	1.4	3	200.1
COL5A1	mRNA	1289	NM_000093	chr9	+	137736394	M	AATAAA	72.1	-42.7	-29.4	29.4	collagen, type V, alpha 1	211.756	1.4	5.5	5	999
TFPI2	mRNA	7980	NM_006528	chr7	-	93515362	M	OtherPAS	22.2	21.8	6.9	28.8	tissue factor pathway inhibitor 2	154.888	1.7	9.6	4	999
PSMD8	mRNA	5714	NM_002812	chr19	+	38874115	F	AATAAA	57.1	-1.7	-0.2	28.4	proteasome (prosome, macropain) 26S subunit, non-ATPase, 8	267.126	1.8	20.3	2	23.9
PSMD8	mRNA	5714	NM_002812	chr19	+	38874464	L	AATAAA	42.9	1.7	0.2	28.4	proteasome (prosome, macropain) 26S subunit, non-ATPase, 8	267.126	1.8	20.3	2	23.9
GPI	mRNA	2821	NM_001184722	chr19	+	34891233	F	AATAAA	86.3	4	0.5	27.7	glucose-6-phosphate isomerase	104.007	1.4	2.8	2	2.8
GPI	mRNA	2821	NM_001184722	chr19	+	34893318	L	AATAAA	13.7	-4	-0.5	27.7	glucose-6-phosphate isomerase	104.007	1.4	2.8	2	2.8
GPX8	mRNA	493869	NM_001008397	chr5	+	54460582	F	OtherPAS	0	0	NA	27.5	glutathione peroxidase 8 (putative)	22.448	1.7	1.8	2	18.8
GPX8	mRNA	493869	NM_001008397	chr5	+	54463125	L	AATAAA	100	0	0	27.5	glutathione peroxidase 8 (putative)	22.448	1.7	1.8	2	18.8
EDF1	mRNA	8721	NM_003792	chr9	-	139756571	F	Arich	78.4	2.9	0.3	27.4	endothelial differentiation-related factor 1	163.119	-1.4	-3.1	2	4.7
EDF1	mRNA	8721	NM_003792	chr9	-	139743222	L	NoPAS	21.6	-2.9	-0.3	27.4	endothelial differentiation-related factor 1	163.119	-1.4	-3.1	2	4.7
C7orf49	mRNA	78996	NM_001243749	chr7	-	134853713	S	ATTAAA	29.6	28.7	27.2	27.2	chromosome 7 open reading frame 49	546.225	-1.2	-2.5	3	74.3
EIF2S1	mRNA	1965	NM_004094	chr14	+	67850577	F	AATAAA	82.6	-7.7	-1.1	26.1	eukaryotic translation initiation factor 2, subunit 1 alpha, 35kDa	111.49	1.4	3.4	2	18
EIF2S1	mRNA	1965	NM_004094	chr14	+	67853233	L	AATAAA	17.4	7.7	1.1	26.1	eukaryotic translation initiation factor 2, subunit 1 alpha, 35kDa	111.49	1.4	3.4	2	18
EFHD2	mRNA	79180	NM_024329	chr1	+	15756835	L	OtherPAS	69	-29	-25.9	25.9	EF-hand domain family, member D2	574.658	-1.4	-10.7	3	228.3
C7orf49	mRNA	78996	NM_001243749	chr7	-	134846299	L	OtherPAS	54.8	-27.6	-25.7	25.7	chromosome 7 open reading frame 49	546.225	-1.2	-2.5	3	74.3
RAB18	mRNA	22931	NM_021252	chr10	+	27827442	F	AATAAA	7.8	8.3	1.8	25.6	RAB18, member RAS oncogene family	152.644	-1.3	-2.3	3	8.5
SND1	mRNA	27044	NM_014390	chr7	+	127732645	F	AATAAA	94.6	-8	-3	25.1	staphylococcal nuclease and tudor domain containing 1	274.609	-1.6	-8.9	2	19.4
SND1	mRNA	27044	NM_014390	chr7	+	127743017	L	AATAAA	5.4	8	3	25.1	staphylococcal nuclease and tudor domain containing 1	274.609	-1.6	-8.9	2	19.4
CD59	mRNA	966	NM_001127223	chr11	-	33726829	L	AATAAA	13.1	11.1	3.5	24.5	CD59 molecule, complement regulatory protein	193.798	1.6	9.7	5	33.2
LARP6	mRNA	55323	NM_018357	chr15	-	71123889	L	AATAAA	30	29.6	1.5	24.3	La ribonucleoprotein domain family, member 6	14.965	2.1	2.3	3	14.1
GPC1	mRNA	2817	NM_002081	chr2	+	241405781	F	OtherPAS	86.6	2.8	0.8	23.9	glypican 1	549.218	-1.8	-22.5	2	22.5
GPC1	mRNA	2817	NM_002081	chr2	+	241407493	L	AATAAA	13.4	-2.8	-0.8	23.9	glypican 1	549.218	-1.8	-22.5	2	22.5
PCMT1	mRNA	5110	NM_005389	chr6	+	150123667	Ic	ATTAAA	30.4	-3.1	-0.1	23.6	protein-L-isoaspartate (D-aspartate) O-methyltransferase	41.902	1.4	1.4	3	1.4
HSPA5	mRNA	3309	NM_005347	chr9	-	127998519	F	AATAAA	71.6	-18.9	-5.3	23.3	heat shock 70kDa protein 5 (glucose-regulated protein, 78kDa)	192.301	1	0.2	2	58.3
HSPA5	mRNA	3309	NM_005347	chr9	-	127997132	L	ATTAAA	28.4	18.9	5.3	23.3	heat shock 70kDa protein 5 (glucose-regulated protein, 78kDa)	192.301	1	0.2	2	58.3
TPT1	mRNA	7178	NM_003295	chr13	-	45911005	M	AATAAA	68.4	-21.6	-9	23.1	tumor protein, translationally-controlled 1	219.986	1.8	16.9	4	308.5
HEXIM1	mRNA	10614	NM_006460	chr17	+	43228018	F	AATAAA	74.5	11.8	0.9	22.9	hexamethylene bis-acetamide inducible 1	70.336	-2	-4.5	2	5.8
HEXIM1	mRNA	10614	NM_006460	chr17	+	43229466	L	ATTAAA	25.5	-11.8	-0.9	22.9	hexamethylene bis-acetamide inducible 1	70.336	-2	-4.5	2	5.8
SSH1	mRNA	54434	NM_018984	chr12	-	109176473	L	AATAAA	43.2	6.1	0.3	22.7	slingshot homolog 1 (Drosophila)	60.609	-1.3	-0.8	3	1.4
TPT1	mRNA	7178	NM_003295	chr13	-	45911312	F	AATAAA	0	0.2	0	22.2	tumor protein, translationally-controlled 1	219.986	1.8	16.9	4	308.5
SCG5	mRNA	6447	NM_001144757	chr15	+	32989093	F	AATAAA	12.6	-4.8	-0.8	22.1	secretogranin V (7B2 protein)	95.028	1.3	1.4	3	200.1
PRPSAP1	mRNA	5635	NM_002766	chr17	-	74308871	Ic	AATAAA	60.9	23.9	4.2	21.9	phosphoribosyl pyrophosphate synthetase-associated protein 1	65.098	1.6	3.1	2	12.9
PRPSAP1	mRNA	5635	NM_002766	chr17	-	74307014	S	AATAAA	39.1	-23.9	-4.2	21.9	phosphoribosyl pyrophosphate synthetase-associated protein 1	65.098	1.6	3.1	2	12.9
SCD	mRNA	6319	NM_005063	chr10	+	102123378	M	AATAAA	26.9	18.6	0.4	21	stearoyl-CoA desaturase (delta-9-desaturase)	19.455	-2.6	-2.1	3	999
SCD	mRNA	6319	NM_005063	chr10	+	102124583	L	AATAAA	53.8	0.7	0	21	stearoyl-CoA desaturase (delta-9-desaturase)	19.455	-2.6	-2.1	3	999
WBP11	mRNA	51729	NM_016312	chr12	-	14939412	F	AATAAA	95.5	0.1	0	20.9	WW domain binding protein 11	151.147	-1.7	-5.3	2	73.2
WBP11	mRNA	51729	NM_016312	chr12	-	14937516	L	ATTAAA	4.5	-0.1	0	20.9	WW domain binding protein 11	151.147	-1.7	-5.3	2	73.2
PPIA	mRNA	5478	NM_021130	chr7	+	44841241	F	AATAAA	99.7	-10.5	-20.7	20.7	peptidylprolyl isomerase A (cyclophilin A)	506.567	1	0.4	2	193.8
PPIA	mRNA	5478	NM_021130	chr7	+	44842716	L	AATAAA	0.3	10.5	20.7	20.7	peptidylprolyl isomerase A (cyclophilin A)	506.567	1	0.4	2	193.8
SSH1	mRNA	54434	NM_018984	chr12	-	109185700	Ic	ATTAAA	35.8	-4.8	-0.2	20.5	slingshot homolog 1 (Drosophila)	60.609	-1.3	-0.8	3	1.4
AXL	mRNA	558	NM_021913	chr19	+	41767671	L	OtherPAS	83.5	-6.7	-10.2	20.3	AXL receptor tyrosine kinase	2077.15	1.1	6.6	3	17.8
CIAO1	mRNA	9391	NM_004804	chr2	+	96937297	F	OtherPAS	48.9	12.6	3.7	20.1	cytosolic iron-sulfur protein assembly 1	422.015	-1.7	-15.7	4	15.7
MYL12A	mRNA	10627	NM_006471	chr18	+	3256124	F	AATAAA	12.6	8.2	1.2	19.9	myosin, light chain 12A, regulatory, non-sarcomeric	231.958	-4.5	-39	2	55.7
MYL12A	mRNA	10627	NM_006471	chr18	+	3256234	L	ATTAAA	87.4	-8.2	-1.2	19.9	myosin, light chain 12A, regulatory, non-sarcomeric	231.958	-4.5	-39	2	55.7
REEP5	mRNA	7905	NM_005669	chr5	-	112212082	L	AATAAA	18.3	28.7	19.9	19.9	receptor accessory protein 5	335.966	-1.1	-0.7	3	30.2
SEC24C	mRNA	9632	NM_004922	chr10	+	75502722	UA	AATAAA	35	-18.5	-1.6	19.8	SEC24 family, member C (S. cerevisiae)	29.93	2.1	4	4	4
PCBP2	mRNA	5094	NM_005016	chr12	+	53873579	M	ATTAAA	6.5	6.6	8.9	19.7	poly(rC) binding protein 2	1216.66	-1.4	-18.5	5	38.9
PDIA4	mRNA	9601	NM_004911	chr7	-	148700534	F	OtherPAS	60.1	-16.5	-5.6	19.6	protein disulfide isomerase family A, member 4	288.826	1.1	0.4	2	61.1
PDIA4	mRNA	9601	NM_004911	chr7	-	148700154	L	AATAAA	39.9	16.5	5.6	19.6	protein disulfide isomerase family A, member 4	288.826	1.1	0.4	2	61.1
GNB1	mRNA	2782	NM_002074	chr1	-	1718194	F	AATAAA	2.9	0	0	19.5	guanine nucleotide binding protein (G protein), beta polypeptide 1	205.021	2.8	57.4	2	57.4
GNB1	mRNA	2782	NM_002074	chr1	-	1716725	L	AATAAA	97.1	0	0	19.5	guanine nucleotide binding protein (G protein), beta polypeptide 1	205.021	2.8	57.4	2	57.4
REEP5	mRNA	7905	NM_005669	chr5	-	112214342	F	ATTAAA	79.3	-29	-19.2	19.2	receptor accessory protein 5	335.966	-1.1	-0.7	3	30.2
SURF4	mRNA	6836	NM_033161	chr9	-	136228340	L	AATAAA	1.6	14.9	18.7	18.7	surfeit 4	362.903	1.3	4.4	3	103.4
CDV3	mRNA	55573	NM_001134422	chr3	+	133306117	M	AATAAA	45	-20.8	-0.9	18.4	CDV3 homolog (mouse)	14.965	1.5	0.8	5	27.1
PEA15	mRNA	8682	NM_003768	chr1	+	160184441	F	ATTAAA	33.8	40.1	8.3	18.3	phosphoprotein enriched in astrocytes 15	50.881	2.9	16.4	2	16.4
PEA15	mRNA	8682	NM_003768	chr1	+	160185162	L	AATAAA	66.2	-40.1	-8.3	18.3	phosphoprotein enriched in astrocytes 15	50.881	2.9	16.4	2	16.4
FOSL2	mRNA	2355	NM_005253	chr2	+	28639558	M	ATTAAA	22.4	24.6	7.8	18.2	FOS-like antigen 2	367.392	-3.6	-50.1	4	50.1
CDV3	mRNA	55573	NM_001134422	chr3	+	133309105	L	AATAAA	40	14.5	0.4	18.2	CDV3 homolog (mouse)	14.965	1.5	0.8	5	27.1
SEC24C	mRNA	9632	NM_004922	chr10	+	75531919	S	AATAAA	45	26.4	2.2	18	SEC24 family, member C (S. cerevisiae)	29.93	2.1	4	4	4
DCBLD2	mRNA	131566	NM_080927	chr3	-	98568230	Ic	AATAAA	45.3	-4.8	-1.1	17.8	discoidin, CUB and LCCL domain containing 2	621.05	-1.6	-16	5	100.3
LOXL2	mRNA	4017	NM_002318	chr8	-	23154693	M	AATAAA	32.7	4.2	0.3	17.7	lysyl oxidase-like 2	75.574	1.7	4.6	5	157.5
TAOK3	mRNA	51347	NM_016281	chr12	-	118597779	Ic	AATAAA	82.2	-59.5	-17.6	17.6	TAO kinase 3	147.406	-3.3	-18.7	2	18.7
TAOK3	mRNA	51347	NM_016281	chr12	-	118587606	S	AATAAA	17.8	59.5	17.6	17.6	TAO kinase 3	147.406	-3.3	-18.7	2	18.7
NTPCR	mRNA	84284	NM_032324	chr1	+	233119628	L	OtherPAS	6.1	22.4	8.6	17.4	nucleoside-triphosphatase, cancer-related	183.322	-1.8	-8	5	8
SET	mRNA	6418	NM_003011	chr9	+	131457812	M	AATAAA	55.6	-23.4	-4.5	17.3	SET nuclear oncogene	80.811	2.4	16.1	3	57.3
CIAO1	mRNA	9391	NM_004804	chr2	+	96939074	M	OtherPAS	45.2	-7.8	-1.7	17.3	cytosolic iron-sulfur protein assembly 1	422.015	-1.7	-15.7	4	15.7
HMGCR	mRNA	3156	NM_000859	chr5	+	74656900	M	OtherPAS	91.8	6.6	2.8	17.3	3-hydroxy-3-methylglutaryl-CoA reductase	173.595	-1.3	-2.5	5	5.6
MACROD1	mRNA	28992	NM_014067	chr11	-	63916090	Is	ATTAAA	65.6	16.4	0.9	16.8	MACRO domain containing 1	23.944	1.4	0.8	5	4.7
MACROD1	mRNA	28992	NM_014067	chr11	-	63766030	F	AATAAA	25	-13	-0.8	16.8	MACRO domain containing 1	23.944	1.4	0.8	5	4.7
DIDO1	mRNA	11083	NM_033081	chr20	-	61509095	F	AATAAA	50.1	13.7	4.5	16.7	death inducer-obliterator 1	264.133	1.6	11.6	4	16.7
FGFR1	mRNA	2260	NM_001174064	chr8	-	38270248	F	AATAAA	42.9	-2	0	16.7	fibroblast growth factor receptor 1	31.427	-1.1	-0.1	4	10
MMP2	mRNA	4313	NM_004530	chr16	+	55540149	F	AATAAA	98.6	-1.2	-1.1	16.5	matrix metallopeptidase 2 (gelatinase A, 72kDa gelatinase, 72kDa type IV collagenase)	856.002	-1.4	-11.3	2	999
MMP2	mRNA	4313	NM_004530	chr16	+	55540586	L	AATAAA	1.4	1.2	1.1	16.5	matrix metallopeptidase 2 (gelatinase A, 72kDa gelatinase, 72kDa type IV collagenase)	856.002	-1.4	-11.3	2	999
SSR1	mRNA	6745	NM_003144	chr6	-	7281376	L	ATTAAA	51.8	19.4	3.7	16.5	signal sequence receptor, alpha	85.301	2.6	20.2	4	27.6
SSR1	mRNA	6745	NM_003144	chr6	-	7287803	M	OtherPAS	25.4	-3.6	-0.4	16.2	signal sequence receptor, alpha	85.301	2.6	20.2	4	27.6
HNRNPA1	mRNA	3178	NM_031157	chr12	+	54678665	F	AATAAA	99.3	-1	-0.3	15.8	heterogeneous nuclear ribonucleoprotein A1	202.028	1	0	2	59.5
HNRNPA1	mRNA	3178	NM_031157	chr12	+	54679030	L	AATAAA	0.7	1	0.3	15.8	heterogeneous nuclear ribonucleoprotein A1	202.028	1	0	2	59.5
RPL37A	mRNA	6168	NM_000998	chr2	+	217367186	M	ATTAAA	58	-20.9	-2.5	15.7	ribosomal protein L37a	89.042	-1.5	-2.3	4	33.2
COL5A1	mRNA	1289	NM_000093	chr9	+	137734755	M	OtherPAS	5.7	23.2	15.4	15.4	collagen, type V, alpha 1	211.756	1.4	5.5	5	999
FOSL1	mRNA	8061	NM_005438	chr11	-	65659692	F	AATAAA	33.2	-4.3	-0.6	15.3	FOS-like antigen 1	182.574	1.9	16	5	148.5
MAP4	mRNA	4134	NM_002375	chr3	-	47893048	F	AATAAA	5.2	-0.6	-0.1	15.3	microtubule-associated protein 4	231.21	-1.1	-0.3	2	0.7
MAP4	mRNA	4134	NM_002375	chr3	-	47892185	L	AATAAA	94.8	0.6	0.1	15.3	microtubule-associated protein 4	231.21	-1.1	-0.3	2	0.7
IDS	mRNA	3423	NM_000202	chrX	-	148561048	M	AATAAA	37.1	-5.5	-0.3	15.2	iduronate 2-sulfatase	66.595	1.4	1.7	5	26.3
CYHR1	mRNA	50626	NM_138496	chr8	-	145689208	Ic	AATAAA	34.5	-7	-0.5	15.2	cysteine/histidine-rich 1	65.098	1.2	0.9	5	2.6
DIDO1	mRNA	11083	NM_033081	chr20	-	61503464	L	AATAAA	2	0.1	0	15.1	death inducer-obliterator 1	264.133	1.6	11.6	4	16.7
FGFR1	mRNA	2260	NM_001174064	chr8	-	38269136	M	ATTAAA	33.3	5.3	0.2	14.9	fibroblast growth factor receptor 1	31.427	-1.1	-0.1	4	10
RPL13	mRNA	6137	NM_033251	chr16	+	89629485	F	AATAAA	96.4	-0.1	-0.3	14.8	ribosomal protein L13	14468.2	-1.3	-166.5	2	999
RPL13	mRNA	6137	NM_033251	chr16	+	89629698	L	NoPAS	3.6	0.1	0.3	14.8	ribosomal protein L13	14468.2	-1.3	-166.5	2	999
IDS	mRNA	3423	NM_000202	chrX	-	148568669	Is	AATAAA	28.1	21.9	2.9	14.7	iduronate 2-sulfatase	66.595	1.4	1.7	5	26.3
AK2	mRNA	204	NM_013411	chr1	-	33474481	M	AATAAA	59.5	10.6	1.1	14.4	adenylate kinase 2	86.797	1.1	0.4	5	0.5
NIPBL	mRNA	25836	NM_015384	chr5	+	37064580	M	AATAAA	44.8	-1.3	-0.1	14.4	Nipped-B homolog (Drosophila)	158.63	-1.1	-0.7	3	0.7
YKT6	mRNA	10652	NM_006555	chr7	+	44252149	F	OtherPAS	76.2	-13.2	-3.7	14.3	YKT6 v-SNARE homolog (S. cerevisiae)	201.28	1.7	11.5	2	62.2
YKT6	mRNA	10652	NM_006555	chr7	+	44253891	L	OtherPAS	23.8	13.2	3.7	14.3	YKT6 v-SNARE homolog (S. cerevisiae)	201.28	1.7	11.5	2	62.2
PPP1R14B	mRNA	26472	NM_138689	chr11	-	64012020	F	ATTAAA	32	8.3	0.2	14.3	protein phosphatase 1, regulatory (inhibitor) subunit 14B	18.706	2.6	4.8	2	44.3
PPP1R14B	mRNA	26472	NM_138689	chr11	-	64011956	L	AATAAA	68	-8.3	-0.2	14.3	protein phosphatase 1, regulatory (inhibitor) subunit 14B	18.706	2.6	4.8	2	44.3
FTH1	mRNA	2495	NM_002032	chr11	-	61731892	M	ATTAAA	4.2	3	2.7	14.3	ferritin, heavy polypeptide 1	1044.56	-1.8	-40.8	3	999
CD63	mRNA	967	NM_001780	chr12	-	56119254	F	ATTAAA	86.1	6.1	1.4	14.3	CD63 molecule	161.623	1.2	1.1	2	60
CD63	mRNA	967	NM_001780	chr12	-	56119226	L	Arich	13.9	-6.1	-1.4	14.3	CD63 molecule	161.623	1.2	1.1	2	60
SLC2A3	mRNA	6515	NM_006931	chr12	-	8073139	F	AATAAA	71.1	1.1	0	14.2	solute carrier family 2 (facilitated glucose transporter), member 3	72.581	-2	-4.4	3	260
RND3	mRNA	390	NM_005168	chr2	-	151325738	F	ATTAAA	90.2	-5.4	-0.4	14.2	Rho family GTPase 3	76.322	-2.5	-6.8	2	6.8
RND3	mRNA	390	NM_005168	chr2	-	151324721	L	AATAAA	9.8	5.4	0.4	14.2	Rho family GTPase 3	76.322	-2.5	-6.8	2	6.8
MTCH2	mRNA	23788	NM_014342	chr11	-	47640262	F	NoPAS	99.3	0.2	1.4	14.1	mitochondrial carrier 2	6669.93	-1.1	-6.1	2	62.9
MTCH2	mRNA	23788	NM_014342	chr11	-	47638869	L	OtherPAS	0.7	-0.2	-1.4	14.1	mitochondrial carrier 2	6669.93	-1.1	-6.1	2	62.9
GOSR2	mRNA	9570	NM_004287	chr17	+	45019386	M	AATAAA	5	10.7	3	14.1	golgi SNAP receptor complex member 2	135.434	-1.3	-1.5	7	20.5
IL36B	mRNA	27177	NM_014438	chr2	-	113785010	Is	ATTAAA	0.4	2.3	1.7	14	interleukin 36, beta	202.777	2.5	40.7	3	999
SYNCRIP	mRNA	10492	NM_001159677	chr6	-	86317502	L	AATAAA	1	8.2	2	14	synaptotagmin binding, cytoplasmic RNA interacting protein	71.832	1.3	1.5	6	36.7
NIPBL	mRNA	25836	NM_015384	chr5	+	37065335	L	AATAAA	40.1	1	0.1	14	Nipped-B homolog (Drosophila)	158.63	-1.1	-0.7	3	0.7
LOXL2	mRNA	4017	NM_002318	chr8	-	23188118	Is	ATTAAA	57.4	-10.3	-1	13.9	lysyl oxidase-like 2	75.574	1.7	4.6	5	157.5
EIF1	mRNA	10209	NM_005801	chr17	+	39847260	F	AATAAA	75	-27.9	-1.6	13.5	eukaryotic translation initiation factor 1	23.944	-1	0	4	23.7
EIF1	mRNA	10209	NM_005801	chr17	+	39847896	L	AATAAA	12.5	-0.7	0	13.5	eukaryotic translation initiation factor 1	23.944	-1	0	4	23.7
PNKD	mRNA	25953	NM_015488	chr2	+	219137670	Ic	AATAAA	73.1	24.8	3.3	13.5	paroxysmal nonkinesigenic dyskinesia	38.909	-1.2	-0.4	2	6.6
PNKD	mRNA	25953	NM_015488	chr2	+	219211514	S	AATAAA	26.9	-24.8	-3.3	13.5	paroxysmal nonkinesigenic dyskinesia	38.909	-1.2	-0.4	2	6.6
ARL6IP5	mRNA	10550	NM_006407	chr3	+	69155217	L	AATAAA	39.6	-29.7	-13.4	13.4	ADP-ribosylation-like factor 6 interacting protein 5	151.147	1.2	1	3	3.4
AXL	mRNA	558	NM_021913	chr19	+	41767105	M	ATTAAA	14.7	7.5	13.4	13.4	AXL receptor tyrosine kinase	2077.15	1.1	6.6	3	17.8
KHNYN	mRNA	23351	NM_015299	chr14	+	24907609	F	OtherPAS	81.9	0.4	0	13.3	KH and NYN domain containing	78.567	-1.2	-0.7	2	6.1
KHNYN	mRNA	23351	NM_015299	chr14	+	24910548	L	AATAAA	18.1	-0.4	0	13.3	KH and NYN domain containing	78.567	-1.2	-0.7	2	6.1
RPS8	mRNA	6202	NM_001012	chr1	+	45244375	F	AATAAA	69.4	7	0.5	13.3	ribosomal protein S8	90.539	-1.2	-0.8	2	8.9
RPS8	mRNA	6202	NM_001012	chr1	+	45244412	L	AATAAA	30.6	-7	-0.5	13.3	ribosomal protein S8	90.539	-1.2	-0.8	2	8.9
SLC2A3	mRNA	6515	NM_006931	chr12	-	8071826	L	AATAAA	9.3	9.2	0.9	13.2	solute carrier family 2 (facilitated glucose transporter), member 3	72.581	-2	-4.4	3	260
PHLDA1	mRNA	22822	NM_007350	chr12	-	76423348	M	ATTAAA	31.7	-7.7	-0.5	13.2	pleckstrin homology-like domain, family A, member 1	47.14	1.1	0.1	7	6.1
EMP1	mRNA	2012	NM_001423	chr12	+	13372873	L	ATTAAA	0	0.5	0.3	13.2	epithelial membrane protein 1	274.609	-1.1	-0.4	3	24.1
PRDX1	mRNA	5052	NM_002574	chr1	-	45976899	F	OtherPAS	99.8	-0.7	-0.7	13.2	peroxiredoxin 1	379.364	-1	-0.3	2	142.2
PRDX1	mRNA	5052	NM_002574	chr1	-	45976723	L	ATTAAA	0.2	0.7	0.7	13.2	peroxiredoxin 1	379.364	-1	-0.3	2	142.2
TMEM167B	mRNA	56900	NM_020141	chr1	+	109637423	F	OtherPAS	88.8	3.6	0.5	13.2	transmembrane protein 167B	120.469	-1.4	-1.9	2	1.9
TMEM167B	mRNA	56900	NM_020141	chr1	+	109639556	L	AATAAA	11.2	-3.6	-0.5	13.2	transmembrane protein 167B	120.469	-1.4	-1.9	2	1.9
THOC1	mRNA	9984	NM_005131	chr18	-	246068	Ic	AATAAA	26	26.6	10.1	13	THO complex 1	210.259	-1.1	-0.5	2	7
THOC1	mRNA	9984	NM_005131	chr18	-	214520	S	AATAAA	74	-26.6	-10.1	13	THO complex 1	210.259	-1.1	-0.5	2	7
CD44	mRNA	960	NM_000610	chr11	+	35253949	L	ATTAAA	15.4	5.8	3	13	CD44 molecule (Indian blood group)	990.687	-2	-51	3	51
PCBP2	mRNA	5094	NM_005016	chr12	+	53873351	F	OtherPAS	0.1	0.2	0.4	13	poly(rC) binding protein 2	1216.66	-1.4	-18.5	5	38.9
SSR3	mRNA	6747	NM_007107	chr3	-	156241529	L	AATAAA	2.7	2.6	1	13	signal sequence receptor, gamma (translocon-associated protein gamma)	335.217	-1.9	-16.1	6	16.1
ZDHHC24	mRNA	254359	NM_207340	chr11	-	66303371	L	OtherPAS	55	-15	-0.3	12.8	zinc finger, DHHC-type containing 24	29.93	-4.4	-5.5	3	5.5
FTH1	mRNA	2495	NM_002032	chr11	-	61732035	F	AATAAA	41.1	-3.3	-0.9	12.7	ferritin, heavy polypeptide 1	1044.56	-1.8	-40.8	3	999
LAMA4	mRNA	3910	NM_001105206	chr6	-	112574990	Ic	AATAAA	87.7	-12.7	-0.8	12.7	laminin, alpha 4	103.259	-7.6	-25.1	3	25.1
PDE4DIP	mRNA	9659	NM_014644	chr1	-	144890592	Is	AATAAA	27	-5.4	-0.3	12.7	phosphodiesterase 4D interacting protein	55.371	1.2	0.6	5	12.8
TFPI2	mRNA	7980	NM_006528	chr7	-	93515147	L	ATTAAA	3.4	0.7	0.1	12.5	tissue factor pathway inhibitor 2	154.888	1.7	9.6	4	999
SQSTM1	mRNA	8878	NM_001142298	chr5	+	179271917	L	AATAAA	1.8	12	12.5	12.5	sequestosome 1	623.295	-3.4	-80.4	4	80.4
C7orf49	mRNA	78996	NM_001243749	chr7	-	134850539	F	OtherPAS	15.6	-1.1	-0.3	12.4	chromosome 7 open reading frame 49	546.225	-1.2	-2.5	3	74.3
RAB27A	mRNA	5873	NM_004580	chr15	-	55497547	F	AATAAA	83	-27.1	-5	12.4	RAB27A, member RAS oncogene family	79.315	1.1	0.3	2	3.5
RAB27A	mRNA	5873	NM_004580	chr15	-	55495164	L	AATAAA	17	27.1	5	12.4	RAB27A, member RAS oncogene family	79.315	1.1	0.3	2	3.5
CD44	mRNA	960	NM_000610	chr11	+	35251574	M	AATAAA	73	-4.9	-1.7	12.2	CD44 molecule (Indian blood group)	990.687	-2	-51	3	51
MTA3	mRNA	57504	NM_020744	chr2	+	42936351	F	AATAAA	36.9	-2.9	-0.2	12.2	metastasis associated 1 family, member 3	97.273	-1.4	-1.6	2	1.6
MTA3	mRNA	57504	NM_020744	chr2	+	42936684	L	AATAAA	63.1	2.9	0.2	12.2	metastasis associated 1 family, member 3	97.273	-1.4	-1.6	2	1.6
ZRANB2	mRNA	9406	NM_005455	chr1	-	71528980	L	AATAAA	4.4	14.6	1.1	12.2	zinc finger, RAN-binding domain containing 2	33.671	-2.4	-3.1	8	3.4
SLC35E1	mRNA	79939	NM_024881	chr19	-	16661667	F	AATAAA	28.4	5.2	0.9	12.2	solute carrier family 35, member E1	252.91	1.2	1.6	2	12.7
SLC35E1	mRNA	79939	NM_024881	chr19	-	16660648	L	AATAAA	71.6	-5.2	-0.9	12.2	solute carrier family 35, member E1	252.91	1.2	1.6	2	12.7
IPO5	mRNA	3843	NM_002271	chr13	+	98675332	M	ATTAAA	20	1	0	11.9	importin 5	37.413	1.5	1.4	4	40.8
SET	mRNA	6418	NM_003011	chr9	+	131458666	L	AATAAA	44.4	23.4	4.5	11.9	SET nuclear oncogene	80.811	2.4	16.1	3	57.3
ISY1	mRNA	57461	NM_001199469	chr3	-	128846258	L	AATAAA	43.4	37.5	11.9	11.9	ISY1 splicing factor homolog (S. cerevisiae)	96.525	1.5	4.1	3	4.1
SNX5	mRNA	27131	NM_152227	chr20	-	17922244	S	AATAAA	62	-27.8	-4.7	11.5	sorting nexin 5	74.825	1.4	1.9	3	5.5
TMED4	mRNA	222068	NM_182547	chr7	-	44619496	Ic	AATAAA	28.1	40.7	11.3	11.3	transmembrane emp24 protein transport domain containing 4	71.832	2.6	16.3	6	16.3
CD59	mRNA	966	NM_001127223	chr11	-	33730223	M	OtherPAS	5	1	0.2	11.3	CD59 molecule, complement regulatory protein	193.798	1.6	9.7	5	33.2
ECE1	mRNA	1889	NM_001113347	chr1	-	21546026	F	OtherPAS	57.3	6.1	1.1	11.3	endothelin converting enzyme 1	386.847	-1.7	-14.2	2	14.2
ECE1	mRNA	1889	NM_001113347	chr1	-	21543743	L	AATAAA	42.7	-6.1	-1.1	11.3	endothelin converting enzyme 1	386.847	-1.7	-14.2	2	14.2
WDR1	mRNA	9948	NM_017491	chr4	-	10076776	F	AATAAA	56.6	11.5	0.5	11.2	WD repeat domain 1	39.657	-1.2	-0.6	3	29.8
HNRNPH3	mRNA	3189	NM_012207	chr10	+	70102028	F	AATAAA	40	6.2	0	11.2	heterogeneous nuclear ribonucleoprotein H3 (2H9)	3.741	2.3	1	4	6
AES	mRNA	166	NM_198969	chr19	-	3053157	F	AATAAA	68.5	-3.8	-0.3	11.2	amino-terminal enhancer of split	111.49	1.9	9.6	2	9.6
AES	mRNA	166	NM_198969	chr19	-	3052908	L	AATAAA	31.5	3.8	0.3	11.2	amino-terminal enhancer of split	111.49	1.9	9.6	2	9.6
HMGA2	mRNA	8091	NM_003483	chr12	+	66357351	F	NoPAS	30.9	-26.7	-11.1	11.1	high mobility group AT-hook 2	121.217	1.1	0.2	5	99.3
HSPA9	mRNA	3313	NM_004134	chr5	-	137902234	Ic	AATAAA	13.6	2	0.5	11.1	heat shock 70kDa protein 9 (mortalin)	502.078	-1.2	-3.9	3	9.6
RPL30	mRNA	6156	NM_000989	chr8	-	99056882	Ic	NoPAS	51.2	16.4	1.9	11	ribosomal protein L30	59.86	2.1	7.9	2	15.9
RPL30	mRNA	6156	NM_000989	chr8	-	99053949	S	AATAAA	48.8	-16.4	-1.9	11	ribosomal protein L30	59.86	2.1	7.9	2	15.9
ZDHHC24	mRNA	254359	NM_207340	chr11	-	66306730	F	AATAAA	40	20	0.5	11	zinc finger, DHHC-type containing 24	29.93	-4.4	-5.5	3	5.5
LOC100131089	lncRNA	100131089	NR_040059	chr15	+	40349201	Is	OtherPAS	50	-20.3	-0.6	11	uncharacterized LOC100131089	13.469	1.9	1.5	5	1.5
VCP	mRNA	7415	NM_007126	chr9	-	35056904	F	AATAAA	56.5	2.4	0.4	10.9	valosin containing protein	553.707	-1.5	-10.9	3	22.1
RAD23B	mRNA	5887	NM_002874	chr9	+	110092728	M	OtherPAS	58.7	10.4	1.3	10.9	RAD23 homolog B (S. cerevisiae)	115.979	1.3	1.7	4	5.8
FBXO32	mRNA	114907	NM_058229	chr8	-	124539222	Is	AATAAA	39.9	-27.4	-1.5	10.8	F-box protein 32	193.049	-17.9	-62.4	8	62.4
CALM1	mRNA	801	NM_006888	chr14	+	90871954	F	AATAAA	80.6	-1	-0.2	10.8	calmodulin 1 (phosphorylase kinase, delta)	277.602	2.5	57.8	2	243.3
CALM1	mRNA	801	NM_006888	chr14	+	90874612	L	AATAAA	19.4	1	0.2	10.8	calmodulin 1 (phosphorylase kinase, delta)	277.602	2.5	57.8	2	243.3
FOSL2	mRNA	2355	NM_005253	chr2	+	28635838	F	ATTAAA	72.5	-25.5	-7.9	10.8	FOS-like antigen 2	367.392	-3.6	-50.1	4	50.1
HDDC3	mRNA	374659	NM_198527	chr15	-	91474148	F	AATAAA	73	-12.1	-1.4	10.8	HD domain containing 3	83.056	1.7	5.2	2	5.2
HDDC3	mRNA	374659	NM_198527	chr15	-	91473198	L	ATTAAA	27	12.1	1.4	10.8	HD domain containing 3	83.056	1.7	5.2	2	5.2
LOC100127983	mRNA	100127983	NM_001190972	chr8	-	91970865	F	OtherPAS	20	-9.7	-1.1	10.5	uncharacterized LOC100127983	48.636	1.6	2.7	3	4
HAGHL	mRNA	84264	NM_032304	chr16	+	785525	L	OtherPAS	40	-20	-0.3	10.5	hydroxyacylglutathione hydrolase-like	3.741	1.8	0.5	3	1.7
TFPI2	mRNA	7980	NM_006528	chr7	-	93515742	M	AATAAA	6.8	0.4	0	10.5	tissue factor pathway inhibitor 2	154.888	1.7	9.6	4	999
HOXB4	mRNA	3214	NM_024015	chr17	-	46655685	E	AATAAA	49.5	37.3	10.5	10.5	homeobox B4	69.588	2.1	8.7	2	8.7
HOXB4	mRNA	3214	NM_024015	chr17	-	46652875	S	AATAAA	50.5	-37.3	-10.5	10.5	homeobox B4	69.588	2.1	8.7	2	8.7
CANX	mRNA	821	NM_001746	chr5	+	179134192	Ic	Arich	9.2	-0.2	0	10.5	calnexin	310.525	1.2	2.9	4	36.8
ANKH	mRNA	56172	NM_054027	chr5	-	14709360	M	ATTAAA	50	-23.8	-0.8	10.4	ankylosis, progressive homolog (mouse)	7.483	5.9	9.2	6	9.2
DENND5A	mRNA	23258	NM_015213	chr11	-	9223833	Ic	ATTAAA	77.8	3.6	0.1	10.3	DENN/MADD domain containing 5A	26.937	1.1	0.1	4	1.5
PHLDA1	mRNA	22822	NM_007350	chr12	-	76422301	M	AATAAA	4.8	-2.1	-0.2	10.3	pleckstrin homology-like domain, family A, member 1	47.14	1.1	0.1	7	6.1
ANKRD9	mRNA	122416	NM_152326	chr14	-	102973182	F	NoPAS	61.4	16.7	1.2	10.2	ankyrin repeat domain 9	32.923	1.5	1.5	3	5.2
RRP15	mRNA	51018	NM_016052	chr1	+	218511322	L	AATAAA	7.3	21.9	1.9	10.2	ribosomal RNA processing 15 homolog (S. cerevisiae)	30.678	1.1	0.1	4	7.1
ERCC1	mRNA	2067	NM_001983	chr19	-	45912881	F	AATAAA	100	-3.4	-0.5	10.2	excision repair cross-complementing rodent repair deficiency, complementation group 1 (includes overlapping antisense sequence)	40.406	2	4.5	2	4.5
ERCC1	mRNA	2067	NM_001983	chr19	-	45910592	L	AATAAA	0	3.4	0.5	10.2	excision repair cross-complementing rodent repair deficiency, complementation group 1 (includes overlapping antisense sequence)	40.406	2	4.5	2	4.5
TPP1	mRNA	1200	NM_000391	chr11	-	6634980	F	NoPAS	1	1.5	0.2	10.1	tripeptidyl peptidase I	77.07	1.4	1.9	2	78.2
TPP1	mRNA	1200	NM_000391	chr11	-	6633999	L	ATTAAA	99	-1.5	-0.2	10.1	tripeptidyl peptidase I	77.07	1.4	1.9	2	78.2
AK2	mRNA	204	NM_013411	chr1	-	33478645	Is	ATTAAA	25	-3.5	-0.3	10.1	adenylate kinase 2	86.797	1.1	0.4	5	0.5
SIKE1	mRNA	80143	NM_001102396	chr1	-	115321728	Ic	AATAAA	11.7	18.3	1.7	10.1	suppressor of IKBKE 1	57.615	-2.1	-4.1	5	14.4
C19orf52	mRNA	90580	NM_138358	chr19	+	11040930	F	AATAAA	87	5.9	0.6	10.1	chromosome 19 open reading frame 52	51.629	-1.1	-0.2	2	9.3
C19orf52	mRNA	90580	NM_138358	chr19	+	11044208	L	AATAAA	13	-5.9	-0.6	10.1	chromosome 19 open reading frame 52	51.629	-1.1	-0.2	2	9.3
HNRNPH3	mRNA	3189	NM_012207	chr10	+	70102950	L	AATAAA	0	23.1	0.3	10	heterogeneous nuclear ribonucleoprotein H3 (2H9)	3.741	2.3	1	4	6
NUB1	mRNA	51667	NM_001243351	chr7	+	151058335	Is	AATAAA	6.5	-1.2	0	10	negative regulator of ubiquitin-like proteins 1	34.42	-1.3	-0.7	5	1.5
SNX5	mRNA	27131	NM_152227	chr20	-	17948321	Is	ATTAAA	35	28.2	4.7	9.9	sorting nexin 5	74.825	1.4	1.9	3	5.5
VCP	mRNA	7415	NM_007126	chr9	-	35056560	M	AATAAA	28	0.5	0.1	9.9	valosin containing protein	553.707	-1.5	-10.9	3	22.1
CSNK1E	mRNA	1454	NM_152221	chr22	-	38692212	Is	AATAAA	50	30.4	2.5	9.9	casein kinase 1, epsilon	28.434	1.3	0.7	3	32.6
SNRPB2	mRNA	6629	NM_003092	chr20	+	16721856	F	AATAAA	43.3	-1.1	-0.1	9.8	small nuclear ribonucleoprotein polypeptide B	172.846	-1.5	-4	2	4
SNRPB2	mRNA	6629	NM_003092	chr20	+	16722421	L	AATAAA	56.7	1.1	0.1	9.8	small nuclear ribonucleoprotein polypeptide B	172.846	-1.5	-4	2	4
FIBCD1	mRNA	84929	NM_032843	chr9	-	133813400	Is	AATAAA	NA	NA	NA	9.8	fibrinogen C domain containing 1	0	999	0.6	4	6.6
FTH1	mRNA	2495	NM_002032	chr11	-	61731760	L	AATAAA	54.7	0.3	0	9.8	ferritin, heavy polypeptide 1	1044.56	-1.8	-40.8	3	999
TM4SF1	mRNA	4071	NM_014220	chr3	-	149087458	F	OtherPAS	34.9	-17.5	-9.8	9.8	transmembrane 4 L six family member 1	450.448	-1.4	-7.9	2	58.8
TM4SF1	mRNA	4071	NM_014220	chr3	-	149086809	L	AATAAA	65.1	17.5	9.8	9.8	transmembrane 4 L six family member 1	450.448	-1.4	-7.9	2	58.8
ATAD3B	mRNA	83858	NM_031921	chr1	+	1406635	UA	AATAAA	11.8	9.6	0.2	9.8	ATPase family, AAA domain containing 3B	12.72	-1.3	-0.3	2	14.4
ATAD3B	mRNA	83858	NM_031921	chr1	+	1431582	S	AATAAA	88.2	-9.6	-0.2	9.8	ATPase family, AAA domain containing 3B	12.72	-1.3	-0.3	2	14.4
SNIP1	mRNA	79753	NM_024700	chr1	-	38000050	L	ATTAAA	21.1	65.9	4.6	9.8	Smad nuclear interacting protein 1	14.217	1.1	0.1	3	1.1
HPS1	mRNA	3257	NM_000195	chr10	-	100189019	Ic	ATTAAA	58.8	11.4	1.1	9.7	Hermansky-Pudlak syndrome 1	89.042	-1.1	-0.3	3	36.8
ZNF655	mRNA	79027	NM_001083956	chr7	+	99174076	S	AATAAA	30.9	39.4	9.7	9.7	zinc finger protein 655	72.581	1.9	6.8	4	6.8
GAA	mRNA	2548	NM_000152	chr17	+	78076532	Ic	AATAAA	0	5.6	0.3	9.7	glucosidase, alpha; acid	25.441	-1	0	2	240.3
GAA	mRNA	2548	NM_000152	chr17	+	78093679	S	AATAAA	100	-5.6	-0.3	9.7	glucosidase, alpha; acid	25.441	-1	0	2	240.3
ARL6IP5	mRNA	10550	NM_006407	chr3	+	69154550	F	AATAAA	56.9	27.1	9.7	9.7	ADP-ribosylation-like factor 6 interacting protein 5	151.147	1.2	1	3	3.4
GLG1	mRNA	2734	NM_001145667	chr16	-	74485856	F	ATTAAA	31.5	-18.6	-9.6	9.6	golgi glycoprotein 1	216.245	1.8	16	2	267.2
GLG1	mRNA	2734	NM_001145667	chr16	-	74481338	L	AATAAA	68.5	18.6	9.6	9.6	golgi glycoprotein 1	216.245	1.8	16	2	267.2
NCS1	mRNA	23413	NM_014286	chr9	+	132995556	F	NoPAS	26.1	40.6	9.6	9.6	neuronal calcium sensor 1	134.686	-2.2	-9.7	7	50.9
INSIG1	mRNA	3638	NM_005542	chr7	+	155101945	L	ATTAAA	9.7	2.3	0.1	9.6	insulin induced gene 1	69.588	-2.1	-4.6	4	41.1
CSF1	mRNA	1435	NM_000757	chr1	+	110473614	S	AATAAA	79.6	-57.6	-9.6	9.6	colony stimulating factor 1 (macrophage)	77.07	-2.8	-8.1	3	8.1
TPT1	mRNA	7178	NM_003295	chr13	-	45911114	M	AATAAA	26.2	21.8	9.5	9.5	tumor protein, translationally-controlled 1	219.986	1.8	16.9	4	308.5
GNPTG	mRNA	84572	NM_032520	chr16	+	1414114	M	AATAAA	87.2	10.9	3	9.5	N-acetylglucosamine-1-phosphate transferase, gamma subunit	64.35	1.6	3.7	3	3.7
C1orf43	mRNA	25912	NM_001098616	chr1	-	154184215	Ic	AATAAA	7	1.2	0.1	9.5	chromosome 1 open reading frame 43	74.825	-1.8	-3.7	3	8.1
C1orf43	mRNA	25912	NM_001098616	chr1	-	154179196	S	AATAAA	93	-7.8	-0.8	9.5	chromosome 1 open reading frame 43	74.825	-1.8	-3.7	3	8.1
RECK	mRNA	8434	NM_021111	chr9	+	36124452	S	AATAAA	0	0	NA	9.4	reversion-inducing-cysteine-rich protein with kazal motifs	8.231	-1.7	-0.5	6	2.2
SLC35B4	mRNA	84912	NM_032826	chr7	-	133974084	L	AATAAA	38	3.2	0.2	9.4	solute carrier family 35, member B4	127.951	-2.2	-9.3	5	9.3
VAMP2	mRNA	6844	NM_014232	chr17	-	8063994	F	NoPAS	75	-6.1	-0.3	9.4	vesicle-associated membrane protein 2 (synaptobrevin 2)	35.916	2.5	8.3	2	18.7
VAMP2	mRNA	6844	NM_014232	chr17	-	8062467	L	AATAAA	25	6.1	0.3	9.4	vesicle-associated membrane protein 2 (synaptobrevin 2)	35.916	2.5	8.3	2	18.7
MSL1	mRNA	339287	NM_001012241	chr17	+	38285996	Ic	AATAAA	19.5	15.9	9.4	9.4	male-specific lethal 1 homolog (Drosophila)	578.4	-1.7	-20	2	45.6
MSL1	mRNA	339287	NM_001012241	chr17	+	38286548	Ic	AATAAA	80.5	-15.9	-9.4	9.4	male-specific lethal 1 homolog (Drosophila)	578.4	-1.7	-20	2	45.6
SNIP1	mRNA	79753	NM_024700	chr1	-	38002142	M	AATAAA	42.1	-29.1	-1.4	9.4	Smad nuclear interacting protein 1	14.217	1.1	0.1	3	1.1
HAGHL	mRNA	84264	NM_032304	chr16	+	779715	F	AATAAA	60	20	0.3	9.3	hydroxyacylglutathione hydrolase-like	3.741	1.8	0.5	3	1.7
DENND5A	mRNA	23258	NM_015213	chr11	-	9160372	L	AATAAA	13.9	4.7	0.1	9.3	DENN/MADD domain containing 5A	26.937	1.1	0.1	4	1.5
CSF3	mRNA	1440	NM_000759	chr17	+	38173303	F	OtherPAS	22.2	-8.8	-0.9	9.3	colony stimulating factor 3 (granulocyte)	53.874	1.7	3.5	2	17
CSF3	mRNA	1440	NM_000759	chr17	+	38174066	L	AATAAA	77.8	8.8	0.9	9.3	colony stimulating factor 3 (granulocyte)	53.874	1.7	3.5	2	17
GOSR2	mRNA	9570	NM_004287	chr17	+	45032921	L	AATAAA	0	0	NA	9.3	golgi SNAP receptor complex member 2	135.434	-1.3	-1.5	7	20.5
SLC25A10	mRNA	1468	NM_012140	chr17	+	79688042	F	AATAAA	22.4	-7.9	-0.6	9.3	solute carrier family 25 (mitochondrial carrier; dicarboxylate transporter), member 10	36.664	1.5	1.7	2	10.5
SLC25A10	mRNA	1468	NM_012140	chr17	+	79705376	L	AATAAA	77.6	7.9	0.6	9.3	solute carrier family 25 (mitochondrial carrier; dicarboxylate transporter), member 10	36.664	1.5	1.7	2	10.5
SHMT2	mRNA	6472	NM_001166357	chr12	+	57628509	F	AATAAA	76.4	-1.7	-0.1	9.3	serine hydroxymethyltransferase 2 (mitochondrial)	110.741	1.1	0.3	2	31.2
SHMT2	mRNA	6472	NM_001166357	chr12	+	57628718	L	OtherPAS	23.6	1.7	0.1	9.3	serine hydroxymethyltransferase 2 (mitochondrial)	110.741	1.1	0.3	2	31.2
DPP4	mRNA	1803	NM_001935	chr2	-	162851339	Ic	AATAAA	27	-21.6	-9.3	9.3	dipeptidyl-peptidase 4	94.28	2.7	23.1	2	25.8
DPP4	mRNA	1803	NM_001935	chr2	-	162848755	S	AATAAA	73	21.6	9.3	9.3	dipeptidyl-peptidase 4	94.28	2.7	23.1	2	25.8
TMCO4	mRNA	255104	NM_181719	chr1	-	20069812	Ic	AATAAA	19.7	7.4	0.4	9.3	transmembrane and coiled-coil domains 4	45.643	-1.1	-0.3	5	11
CSNK1E	mRNA	1454	NM_152221	chr22	-	38686697	S	AATAAA	42.1	-24.2	-1.8	9.3	casein kinase 1, epsilon	28.434	1.3	0.7	3	32.6
RAD23B	mRNA	5887	NM_002874	chr9	+	110093174	M	ATTAAA	10.3	0.2	0	9.2	RAD23 homolog B (S. cerevisiae)	115.979	1.3	1.7	4	5.8
AGFG2	mRNA	3268	NM_006076	chr7	+	100153990	Ic	AATAAA	19.1	55.4	9.2	9.2	ArfGAP with FG repeats 2	50.881	-1.4	-1.1	7	1.4
FOSL1	mRNA	8061	NM_005438	chr11	-	65657548	M	AATAAA	21.7	-0.2	0	9.2	FOS-like antigen 1	182.574	1.9	16	5	148.5
PPP2R5E	mRNA	5529	NM_006246	chr14	-	63838082	L	AATAAA	0	11.7	9.2	9.2	protein phosphatase 2, regulatory subunit B', epsilon isoform	168.357	1.5	5.3	3	5.3
ISY1	mRNA	57461	NM_001199469	chr3	-	128848672	F	NoPAS	41.9	-29.6	-9.2	9.2	ISY1 splicing factor homolog (S. cerevisiae)	96.525	1.5	4.1	3	4.1
FHAD1	mRNA	114827	NM_052929	chr1	+	15724025	F	OtherPAS	4.8	-3	-0.2	9.2	forkhead-associated (FHA) phosphopeptide binding domain 1	31.427	1.2	0.4	14	5.4
PARVB	mRNA	29780	NM_001003828	chr22	+	44568819	L	AATAAA	5.6	29.8	9.2	9.2	parvin, beta	80.811	1.7	5.5	3	5.5
EXD3	mRNA	54932	NM_017820	chr9	-	140201348	S	NoPAS	6.7	33.3	0.9	9.1	exonuclease 3'-5' domain containing 3	11.224	-1.7	-0.6	6	20.9
INSIG1	mRNA	3638	NM_005542	chr7	+	155100925	M	ATTAAA	14	8	0.6	9.1	insulin induced gene 1	69.588	-2.1	-4.6	4	41.1
ST3GAL3	mRNA	6487	NM_174963	chr1	+	44396831	S	AATAAA	38.9	-16.7	-0.3	9.1	ST3 beta-galactoside alpha-2,3-sialyltransferase 3	13.469	-1.1	-0.1	5	0.5
GNPTG	mRNA	84572	NM_032520	chr16	+	1413352	F	OtherPAS	12.8	-10.9	-3	9	N-acetylglucosamine-1-phosphate transferase, gamma subunit	64.35	1.6	3.7	3	3.7
SSR3	mRNA	6747	NM_007107	chr3	-	156261554	Ic	AATAAA	3.8	7.6	3.9	9	signal sequence receptor, gamma (translocon-associated protein gamma)	335.217	-1.9	-16.1	6	16.1
SCG5	mRNA	6447	NM_001144757	chr15	+	32959321	Ic	ATTAAA	4.7	-3	-0.8	9	secretogranin V (7B2 protein)	95.028	1.3	1.4	3	200.1
RPL27A	mRNA	6157	NM_000990	chr11	+	8707393	F	ATTAAA	90.9	-9.3	-4.8	8.9	ribosomal protein L27a	378.616	-1.1	-0.8	3	45.2
LAMA4	mRNA	3910	NM_001105206	chr6	-	112430332	S	AATAAA	12.3	12.7	0.8	8.9	laminin, alpha 4	103.259	-7.6	-25.1	3	25.1
HSPA9	mRNA	3313	NM_004134	chr5	-	137891024	L	AATAAA	86.4	-2	-0.5	8.9	heat shock 70kDa protein 9 (mortalin)	502.078	-1.2	-3.9	3	9.6
COL4A6	mRNA	1288	NM_033641	chrX	-	107453395	Ic	AATAAA	40	30	0.4	8.8	collagen, type IV, alpha 6	7.483	-1.1	-0.1	4	2.6
UQCRB	mRNA	7381	NM_001199975	chr8	-	97243843	Is	AATAAA	61	2.9	0.2	8.8	ubiquinol-cytochrome c reductase binding protein	163.119	-1.3	-2.2	2	11.9
UQCRB	mRNA	7381	NM_001199975	chr8	-	97243167	S	AATAAA	39	-2.9	-0.2	8.8	ubiquinol-cytochrome c reductase binding protein	163.119	-1.3	-2.2	2	11.9
NUB1	mRNA	51667	NM_001243351	chr7	+	151075527	F	AATAAA	76.1	0.2	0	8.8	negative regulator of ubiquitin-like proteins 1	34.42	-1.3	-0.7	5	1.5
INCENP	mRNA	3619	NM_001040694	chr11	+	61922217	M	OtherPAS	0	7.8	1.9	8.8	inner centromere protein antigens 135/155kDa	55.371	1.4	1.7	5	79.9
CKS2	mRNA	1164	NM_001827	chr9	+	91924950	UA	ATTAAA	0.9	-0.9	-2	8.7	CDC28 protein kinase regulatory subunit 2	254.406	3.2	93.9	2	279.8
CKS2	mRNA	1164	NM_001827	chr9	+	91931618	S	AATAAA	99.1	0.9	2	8.7	CDC28 protein kinase regulatory subunit 2	254.406	3.2	93.9	2	279.8
NUP214	mRNA	8021	NM_005085	chr9	+	134109089	F	ATTAAA	12.2	5.5	0.5	8.7	nucleoporin 214kDa	67.343	-1	-0.1	2	13.6
NUP214	mRNA	8021	NM_005085	chr9	+	134110050	L	AATAAA	87.8	-5.5	-0.5	8.7	nucleoporin 214kDa	67.343	-1	-0.1	2	13.6
OGFRL1	mRNA	79627	NM_024576	chr6	+	72018762	L	AATAAA	3.3	12.1	0.7	8.7	opioid growth factor receptor-like 1	22.448	-2.6	-2.5	6	3.6
MOV10	mRNA	4343	NM_020963	chr1	+	113231402	Is	ATTAAA	60.9	-58.4	-8.7	8.7	Mov10, Moloney leukemia virus 10, homolog (mouse)	34.42	-1.3	-0.6	4	0.9
SIKE1	mRNA	80143	NM_001102396	chr1	-	115316763	F	ATTAAA	76.6	-29.1	-2.7	8.7	suppressor of IKBKE 1	57.615	-2.1	-4.1	5	14.4
RAB18	mRNA	22931	NM_021252	chr10	+	27828757	M	AATAAA	43.6	-12.1	-1.7	8.6	RAB18, member RAS oncogene family	152.644	-1.3	-2.3	3	8.5
GRB2	mRNA	2885	NM_002086	chr17	-	73316092	F	AATAAA	35.6	-15.6	-1.2	8.6	growth factor receptor-bound protein 2	44.147	-1	0	2	18.5
GRB2	mRNA	2885	NM_002086	chr17	-	73314159	L	AATAAA	64.4	15.6	1.2	8.6	growth factor receptor-bound protein 2	44.147	-1	0	2	18.5
CEP89	mRNA	84902	NM_032816	chr19	-	33462370	Is	NoPAS	77.4	8.5	1	8.6	centrosomal protein 89kDa	69.588	1.9	6.3	4	15.7
INSIG1	mRNA	3638	NM_005542	chr7	+	155100305	F	ATTAAA	69.9	-7.9	-0.4	8.5	insulin induced gene 1	69.588	-2.1	-4.6	4	41.1
TIMP2	mRNA	7077	NM_003255	chr17	-	76851624	F	AATAAA	23.8	-8.8	-8.3	8.3	TIMP metallopeptidase inhibitor 2	682.407	2.5	133.2	2	999
TIMP2	mRNA	7077	NM_003255	chr17	-	76849059	L	AATAAA	76.2	8.8	8.3	8.3	TIMP metallopeptidase inhibitor 2	682.407	2.5	133.2	2	999
FRMD6	mRNA	122786	NM_001042481	chr14	+	52197445	S	AATAAA	57.1	14.3	0.2	8.3	FERM domain containing 6	10.476	-2.2	-1.1	4	5.6
TMEM185B	mRNA	79134	NM_024121	chr2	-	120975055	L	AATAAA	25.5	29.8	8.3	8.3	transmembrane protein 185B	108.497	1.6	5.8	5	5.8
RPL28	mRNA	6158	NM_001136134	chr19	+	55899741	F	AATAAA	56.5	11.4	1.4	8.3	ribosomal protein L28	125.707	-1.1	-0.6	3	999
SERPINB8	mRNA	5271	NM_198833	chr18	+	61633599	UA	ATTAAA	0	5.3	0	8.2	serpin peptidase inhibitor, clade B (ovalbumin), member 8	14.217	-1.1	-0.1	3	45.4
FAM114A1	mRNA	92689	NM_138389	chr4	+	38916792	Ic	ATTAAA	26.1	7.2	0.1	8.2	family with sequence similarity 114, member A1	17.21	-1.2	-0.3	5	3.7
MAPKAPK2	mRNA	9261	NM_004759	chr1	+	206907626	F	OtherPAS	88.8	3.4	0.1	8.2	mitogen-activated protein kinase-activated protein kinase 2	59.86	-1.7	-2.7	2	5.6
MAPKAPK2	mRNA	9261	NM_004759	chr1	+	206922385	L	AATAAA	11.2	-3.4	-0.1	8.2	mitogen-activated protein kinase-activated protein kinase 2	59.86	-1.7	-2.7	2	5.6
CTNNA1	mRNA	1495	NM_001903	chr5	+	138270401	F	AATAAA	33.3	-5	-0.8	8.2	catenin (cadherin-associated protein), alpha 1, 102kDa	251.413	-1	-0.1	2	9.4
CTNNA1	mRNA	1495	NM_001903	chr5	+	138270721	L	AATAAA	66.7	5	0.8	8.2	catenin (cadherin-associated protein), alpha 1, 102kDa	251.413	-1	-0.1	2	9.4
SLC35B4	mRNA	84912	NM_032826	chr7	-	133975158	M	AATAAA	5.3	-2.9	-0.5	8.1	solute carrier family 35, member B4	127.951	-2.2	-9.3	5	9.3
C14orf2	mRNA	9556	NM_001127393	chr14	-	104378853	F	AATAAA	19.6	1.3	0.2	8.1	chromosome 14 open reading frame 2	251.413	-1	-0.2	2	4.6
C14orf2	mRNA	9556	NM_001127393	chr14	-	104378625	L	AATAAA	80.4	-1.3	-0.2	8.1	chromosome 14 open reading frame 2	251.413	-1	-0.2	2	4.6
ITGB5	mRNA	3693	NM_002213	chr3	-	124482010	F	AATAAA	72.8	-13.7	-1.2	8.1	integrin, beta 5	68.839	-1.2	-0.5	3	1.5
BSG	mRNA	682	NM_001728	chr19	+	582905	F	OtherPAS	6.2	7.5	2.9	8.1	basigin (Ok blood group)	218.49	1.3	3.3	2	999
BSG	mRNA	682	NM_001728	chr19	+	583487	L	AATAAA	93.8	-7.5	-2.9	8.1	basigin (Ok blood group)	218.49	1.3	3.3	2	999
IL36B	mRNA	27177	NM_014438	chr2	-	113793889	Ic	AATAAA	2.6	-1.7	-1.2	8	interleukin 36, beta	202.777	2.5	40.7	3	999
MOV10	mRNA	4343	NM_020963	chr1	+	113243361	F	Arich	23.9	61.1	8	8	Mov10, Moloney leukemia virus 10, homolog (mouse)	34.42	-1.3	-0.6	4	0.9
F11R	mRNA	50848	NM_016946	chr1	-	160965984	M	AATAAA	36.9	-16.9	-1.1	8	F11 receptor	77.07	-2.9	-8.4	6	9.6
STK40	mRNA	83931	NM_032017	chr1	-	36805229	L	AATAAA	77.4	-69.1	-8	8	serine/threonine kinase 40	39.657	-2.4	-3.7	6	4.9
GTF2F1	mRNA	2962	NM_002096	chr19	-	6379574	M	AATAAA	18.4	8.1	0.2	8	general transcription factor IIF, polypeptide 1, 74kDa	28.434	-1.2	-0.4	6	1.4
MAP7D3	mRNA	79649	NM_001173517	chrX	-	135300402	Is	OtherPAS	99.9	0.1	0	7.9	MAP7 domain containing 3	922.596	-1.2	-4.6	2	71.5
MAP7D3	mRNA	79649	NM_001173517	chrX	-	135298973	Is	AATAAA	0.1	-0.1	0	7.9	MAP7 domain containing 3	922.596	-1.2	-4.6	2	71.5
PCDH9	mRNA	5101	NM_203487	chr13	-	67798638	Ic	AATAAA	0	NA	NA	7.9	protocadherin 9	0.748	-999	-0.3	5	0.6
EHD1	mRNA	10938	NM_006795	chr11	-	64621562	F	OtherPAS	12.7	16.5	2.4	7.9	EH-domain containing 1	94.28	-1.5	-2.2	3	27
FRMD6	mRNA	122786	NM_001042481	chr14	+	52046018	Ic	AATAAA	14.3	14.3	0.2	7.9	FERM domain containing 6	10.476	-2.2	-1.1	4	5.6
ARF4	mRNA	378	NM_001660	chr3	-	57557090	M	AATAAA	15	-11.9	-1.7	7.9	ADP-ribosylation factor 4	59.86	-1.4	-1.2	3	13.6
INCENP	mRNA	3619	NM_001040694	chr11	+	61922946	M	AATAAA	97.3	-5.9	-0.9	7.8	inner centromere protein antigens 135/155kDa	55.371	1.4	1.7	5	79.9
FUCA2	mRNA	2519	NM_032020	chr6	-	143816624	F	ATTAAA	94.7	-24.2	-7.8	7.8	fucosidase, alpha-L- 2, plasma	112.238	-1.1	-0.4	2	11.9
FUCA2	mRNA	2519	NM_032020	chr6	-	143815091	L	AATAAA	5.3	24.2	7.8	7.8	fucosidase, alpha-L- 2, plasma	112.238	-1.1	-0.4	2	11.9
DCBLD2	mRNA	131566	NM_080927	chr3	-	98516627	M	AATAAA	9.6	5.3	2.6	7.8	discoidin, CUB and LCCL domain containing 2	621.05	-1.6	-16	5	100.3
RP11-768F21.1	lncRNA	NA	ENST00000509470	chr12	-	119825796	S	AATAAA	84.3	11	1.2	7.8		38.161	1.1	0.3	3	46
PDXK	mRNA	8566	NM_003681	chr21	+	45182178	L	AATAAA	12	-7.2	-1.2	7.7	pyridoxal (pyridoxine, vitamin B6) kinase	143.665	-2	-8.5	6	8.5
MTA2	mRNA	9219	NM_004739	chr11	-	62360686	L	AATAAA	29.4	-0.6	0	7.7	metastasis associated 1 family, member 2	139.923	-1.5	-3.4	3	67.2
DNAJC19	mRNA	131118	NM_001190233	chr3	-	180702307	M	OtherPAS	41.7	-8.4	-0.2	7.7	DnaJ (Hsp40) homolog, subfamily C, member 19	26.937	-1.3	-0.6	4	1.3
RPL14	mRNA	9045	NM_001034996	chr3	+	40503771	F	AATAAA	1.6	0.3	0.3	7.7	ribosomal protein L14	1042.32	-1.2	-5.4	2	75.9
RPL14	mRNA	9045	NM_001034996	chr3	+	40503859	L	AATAAA	98.4	-0.3	-0.3	7.7	ribosomal protein L14	1042.32	-1.2	-5.4	2	75.9
ARF4	mRNA	378	NM_001660	chr3	-	57557801	F	ATTAAA	85	2.7	0.1	7.7	ADP-ribosylation factor 4	59.86	-1.4	-1.2	3	13.6
ACTR8	mRNA	93973	NM_022899	chr3	-	53905185	Ic	AATAAA	41.4	-3.4	-0.1	7.7	ARP8 actin-related protein 8 homolog (yeast)	43.399	-1.3	-0.7	8	1.9
CAPZB	mRNA	832	NM_001206541	chr1	-	19700669	Is	AATAAA	12.4	1	0.1	7.7	capping protein (actin filament) muscle Z-line, beta	222.979	-1.4	-3.8	4	3.8
RABGGTB	mRNA	5876	NM_004582	chr1	+	76260771	L	AATAAA	4.8	4.7	0	7.7	Rab geranylgeranyltransferase, beta subunit	15.713	-1.1	-0.1	4	2.1
ANKH	mRNA	56172	NM_054027	chr5	-	14711173	F	OtherPAS	30	26.9	0.8	7.7	ankylosis, progressive homolog (mouse)	7.483	5.9	9.2	6	9.2
ZFAND5	mRNA	7763	NM_001102420	chr9	-	74970788	F	ATTAAA	3.1	-1.2	-0.9	7.6	zinc finger, AN1-type domain 5	671.183	-1.1	-1.8	5	50.8
SERPINE1	mRNA	5054	NM_000602	chr7	+	100781584	F	OtherPAS	77.1	-1.7	-0.2	7.6	serpin peptidase inhibitor, clade E (nexin, plasminogen activator inhibitor type 1), member 1	284.336	-1.7	-10.8	2	999
SERPINE1	mRNA	5054	NM_000602	chr7	+	100782547	L	AATAAA	22.9	1.7	0.2	7.6	serpin peptidase inhibitor, clade E (nexin, plasminogen activator inhibitor type 1), member 1	284.336	-1.7	-10.8	2	999
TGFA	mRNA	7039	NM_003236	chr2	-	70677303	F	OtherPAS	19	-14.3	-1.5	7.5	transforming growth factor, alpha	62.853	-2.2	-4.6	2	19.3
TGFA	mRNA	7039	NM_003236	chr2	-	70674416	L	OtherPAS	81	14.3	1.5	7.5	transforming growth factor, alpha	62.853	-2.2	-4.6	2	19.3
DRAM2	mRNA	128338	NM_178454	chr1	-	111660529	F	AATAAA	14.8	3	0.1	7.5	DNA-damage regulated autophagy modulator 2	40.406	-1.3	-0.8	3	8.1
POFUT1	mRNA	23509	NM_015352	chr20	+	30804781	Ic	OtherPAS	4.1	27.1	7.4	7.4	protein O-fucosyltransferase 1	109.245	-2	-6.6	6	6.6
LAMP2	mRNA	3920	NM_002294	chrX	-	119564795	L	AATAAA	55.2	-24.2	-1.6	7.4	lysosomal-associated membrane protein 2	43.399	-1.5	-1.4	4	5.3
SLAIN2	mRNA	57606	NM_020846	chr4	+	48427018	L	AATAAA	93.2	-4.8	-0.8	7.4	SLAIN motif family, member 2	77.07	5.3	76.1	3	76.1
DNAH11	mRNA	8701	NM_003777	chr7	+	21696074	Ic	AATAAA	15	-15	-7.4	7.4	dynein, axonemal, heavy chain 11	84.553	1.4	2.6	2	3.5
DNAH11	mRNA	8701	NM_003777	chr7	+	21941457	S	AATAAA	85	15	7.4	7.4	dynein, axonemal, heavy chain 11	84.553	1.4	2.6	2	3.5
ADRBK2	mRNA	157	NM_005160	chr22	+	26118635	F	AATAAA	22.2	27.8	1.2	7.4	adrenergic, beta, receptor kinase 2	26.937	-2.5	-2.7	7	9.3
CSF1	mRNA	1435	NM_000757	chr1	+	110469560	Is	AATAAA	19.4	48.9	7.3	7.3	colony stimulating factor 1 (macrophage)	77.07	-2.8	-8.1	3	8.1
GALNT1	mRNA	2589	NM_020474	chr18	+	33291588	L	AATAAA	28.6	2.6	0	7.2	UDP-N-acetyl-alpha-D-galactosamine:polypeptide N-acetylgalactosaminyltransferase 1 (GalNAc-T1)	15.713	-1.5	-0.5	4	7.3
HPS1	mRNA	3257	NM_000195	chr10	-	100176786	F	AATAAA	29.4	-11.2	-1.3	7.2	Hermansky-Pudlak syndrome 1	89.042	-1.1	-0.3	3	36.8
TMED4	mRNA	222068	NM_182547	chr7	-	44617909	M	AATAAA	45.8	-28.9	-7.2	7.2	transmembrane emp24 protein transport domain containing 4	71.832	2.6	16.3	6	16.3
FADS1	mRNA	3992	NM_013402	chr11	-	61567097	L	AATAAA	85.7	-2.8	0	7.2	fatty acid desaturase 1	10.476	4.9	9.6	3	50
APOLD1	mRNA	81575	NM_001130415	chr12	+	12944025	S	AATAAA	94.1	-15.5	-0.7	7.2	apolipoprotein L domain containing 1	12.72	6	15.7	4	15.7
HLA-E	mRNA	3133	NM_005516	chr6	+	30461971	L	AATAAA	13.3	7.5	0.4	7.2	major histocompatibility complex, class I, E	33.671	-1	0	3	29.5
RP11-768F21.1	lncRNA	NA	ENST00000509470	chr12	-	120004647	Ic	ATTAAA	15.7	-11	-1.2	7.2		38.161	1.1	0.3	3	46
B3GNT9	mRNA	84752	NM_033309	chr16	-	67183760	F	NoPAS	14.3	73.6	7.1	7.1	UDP-GlcNAc:betaGal beta-1,3-N-acetylglucosaminyltransferase 9	15.713	1.4	0.6	4	3.6
LHPP	mRNA	64077	NM_022126	chr10	+	126302710	S	OtherPAS	0	0	NA	7.1	phospholysine phosphohistidine inorganic pyrophosphate phosphatase	2.245	-3.3	-0.4	4	3.5
PTGS2	mRNA	5743	NM_000963	chr1	-	186641226	M	AATAAA	0	0	NA	7.1	prostaglandin-endoperoxide synthase 2 (prostaglandin G/H synthase and cyclooxygenase)	8.979	-3.3	-1.4	8	59.5
LOC100505894	lncRNA	100505894	NR_039993	chr5	+	87732486	S	AATAAA	0	0	NA	7.1	uncharacterized LOC100505894	7.483	2.5	2	5	2
RP11-95P13.1	lncRNA	NA	ENST00000420762	chr1	-	219618838	UA	AATAAA	NA	NA	NA	7.1		0	999	5	4	5
TRAF1	mRNA	7185	NM_005658	chr9	-	123670373	Ic	ATTAAA	52.6	-19.3	0	7	TNF receptor-associated factor 1	14.217	-7	-3.5	3	3.5
RABGEF1	mRNA	27342	NM_014504	chr7	+	66204920	UA	AATAAA	90.5	3.8	1.7	7	RAB guanine nucleotide exchange factor (GEF) 1	361.406	1.1	0.7	6	2.6
CD59	mRNA	966	NM_001127223	chr11	-	33731542	F	AATAAA	73.4	-20.2	-7	7	CD59 molecule, complement regulatory protein	193.798	1.6	9.7	5	33.2
FADS1	mRNA	3992	NM_013402	chr11	-	61569745	F	OtherPAS	0	13.2	0.5	7	fatty acid desaturase 1	10.476	4.9	9.6	3	50
EIF2A	mRNA	83939	NM_032025	chr3	+	150282729	Ic	ATTAAA	0	0	NA	7	eukaryotic translation initiation factor 2A, 65kDa	7.483	-1.6	-0.3	4	13.2
PRRT3	mRNA	285368	NM_207351	chr3	-	9996477	UA	OtherPAS	40.6	-7.3	-0.2	7	proline-rich transmembrane protein 3	23.944	1	0	6	0.6
F11R	mRNA	50848	NM_016946	chr1	-	160955502	L	AATAAA	6.8	30.7	4.7	7	F11 receptor	77.07	-2.9	-8.4	6	9.6
AXL	mRNA	558	NM_021913	chr19	+	41766196	F	ATTAAA	1.8	-0.8	-2.3	7	AXL receptor tyrosine kinase	2077.15	1.1	6.6	3	17.8
C4orf3	mRNA	401152	NM_001170330	chr4	-	120219643	F	OtherPAS	97.7	0.5	0.1	6.9	chromosome 4 open reading frame 3	99.518	1.5	4	2	33.4
C4orf3	mRNA	401152	NM_001170330	chr4	-	120218207	L	AATAAA	2.3	-0.5	-0.1	6.9	chromosome 4 open reading frame 3	99.518	1.5	4	2	33.4
CTBP2	mRNA	1488	NM_022802	chr10	-	126677402	M	OtherPAS	0	0	NA	6.9	C-terminal binding protein 2	2.993	9	7.2	3	10.2
CTDSP2	mRNA	10106	NM_005730	chr12	-	58216587	F	OtherPAS	62	31.3	1.6	6.9	CTD (carboxy-terminal domain, RNA polymerase II, polypeptide A) small phosphatase 2	37.413	-3.7	-5.7	3	8.8
CTDSP2	mRNA	10106	NM_005730	chr12	-	58213710	L	AATAAA	32	-25.3	-1	6.9	CTD (carboxy-terminal domain, RNA polymerase II, polypeptide A) small phosphatase 2	37.413	-3.7	-5.7	3	8.8
GGCX	mRNA	2677	NM_000821	chr2	-	85785848	Ic	ATTAAA	30.6	-8.7	-0.5	6.9	gamma-glutamyl carboxylase	26.937	1.6	1.6	7	9.4
SCLY	mRNA	51540	NM_016510	chr2	+	239008054	S	AATAAA	21.7	67.8	6.9	6.9	selenocysteine lyase	17.21	1.5	0.8	4	30.3
ARL6IP5	mRNA	10550	NM_006407	chr3	+	69154949	M	AATAAA	3.5	2.6	0.6	6.9	ADP-ribosylation-like factor 6 interacting protein 5	151.147	1.2	1	3	3.4
MIER1	mRNA	57708	NM_001146110	chr1	+	67453349	M	ATTAAA	68.5	-2.2	-0.1	6.9	mesoderm induction early response 1 homolog (Xenopus laevis)	54.622	1.2	0.8	4	3
ZNF264	mRNA	9422	NM_003417	chr19	+	57706315	Ic	AATAAA	50	12.5	0.3	6.9	zinc finger protein 264	11.972	1.4	0.4	4	0.4
RNF24	mRNA	11237	NM_007219	chr20	-	3907958	L	AATAAA	0	0	NA	6.8	ring finger protein 24	5.238	1.8	0.6	8	0.6
SIRPA	mRNA	140885	NM_001040022	chr20	+	1920540	L	AATAAA	31.8	9.9	0.1	6.8	signal-regulatory protein alpha	16.462	-2	-1.2	5	14.4
PDF	mRNA	64146	NM_022341	chr16	-	69355894	L	ATTAAA	14.3	-6.8	-0.3	6.8	peptide deformylase (mitochondrial)	26.189	1	0	7	1.3
FADS3	mRNA	3995	NM_021727	chr11	-	61646635	Ic	AATAAA	50.8	29.3	6.8	6.8	fatty acid desaturase 3	95.776	1.1	0.5	2	0.5
FADS3	mRNA	3995	NM_021727	chr11	-	61640998	S	ATTAAA	49.2	-29.3	-6.8	6.8	fatty acid desaturase 3	95.776	1.1	0.5	2	0.5
RPL37A	mRNA	6168	NM_000998	chr2	+	217366284	M	NoPAS	4.2	0.3	0	6.8	ribosomal protein L37a	89.042	-1.5	-2.3	4	33.2
PPP1R11	mRNA	6992	NM_021959	chr6	+	30041782	L	AATAAA	9.3	2.2	0.1	6.8	protein phosphatase 1, regulatory (inhibitor) subunit 11	56.119	-1.6	-2	3	2
CRBN	mRNA	51185	NM_016302	chr3	-	3213871	Is	AATAAA	52.6	14.1	0.2	6.8	cereblon	14.217	-2.3	-1.4	9	1.8
KIAA0090	mRNA	23065	NM_015047	chr1	-	19544584	L	OtherPAS	32.5	6.6	0.7	6.8	KIAA0090	149.651	-1.4	-2.9	3	41.8
ST3GAL3	mRNA	6487	NM_174963	chr1	+	44174475	Ic	AATAAA	0	16.7	0.6	6.8	ST3 beta-galactoside alpha-2,3-sialyltransferase 3	13.469	-1.1	-0.1	5	0.5
DRAM2	mRNA	128338	NM_178454	chr1	-	111659954	L	AATAAA	57.4	4.8	0.2	6.8	DNA-damage regulated autophagy modulator 2	40.406	-1.3	-0.8	3	8.1
STC2	mRNA	8614	NM_003714	chr5	-	172744068	M	AATAAA	73.5	-20.5	-1.8	6.8	stanniocalcin 2	36.664	2.5	7.9	4	50.7
DIDO1	mRNA	11083	NM_033081	chr20	-	61518566	Ic	AATAAA	39.9	-7.4	-1.7	6.7	death inducer-obliterator 1	264.133	1.6	11.6	4	16.7
RBBP9	mRNA	10741	NM_006606	chr20	-	18467958	M	OtherPAS	0	0	NA	6.7	retinoblastoma binding protein 9	12.72	1.9	1.6	4	1.6
IMPAD1	mRNA	54928	NM_017813	chr8	-	57870490	L	AATAAA	44.1	6.6	0.2	6.7	inositol monophosphatase domain containing 1	25.441	4	15.4	7	15.4
UBE2V2	mRNA	7336	NM_003350	chr8	+	48977268	M	AATAAA	18.3	-4.4	-0.5	6.7	ubiquitin-conjugating enzyme E2 variant 2	81.56	1.4	2.5	4	4.1
CTBP2	mRNA	1488	NM_022802	chr10	-	126676904	L	AATAAA	50	50	2.2	6.7	C-terminal binding protein 2	2.993	9	7.2	3	10.2
SUMO3	mRNA	6612	NM_006936	chr21	-	46225532	L	OtherPAS	47.3	-36.3	-6.7	6.7	SMT3 suppressor of mif two 3 homolog 3 (S. cerevisiae)	55.371	1.1	0.3	3	27.2
HNRNPA2B1	mRNA	3181	NM_031243	chr7	-	26231464	F	AATAAA	97.4	1.4	0.6	6.7	heterogeneous nuclear ribonucleoprotein A2/B1	228.965	1.2	1.9	2	999
HNRNPA2B1	mRNA	3181	NM_031243	chr7	-	26229924	L	AATAAA	2.6	-1.4	-0.6	6.7	heterogeneous nuclear ribonucleoprotein A2/B1	228.965	1.2	1.9	2	999
DDX5	mRNA	1655	NM_004396	chr17	-	62494372	L	AATAAA	70.4	25.2	2.3	6.7	DEAD (Asp-Glu-Ala-Asp) box polypeptide 5	20.203	1.5	1	3	4.5
KLC1	mRNA	3831	NM_005552	chr14	+	104151585	Ic	NoPAS	3.7	-2.9	-6.7	6.7	kinesin light chain 1	644.246	2.2	86.7	2	86.7
KLC1	mRNA	3831	NM_005552	chr14	+	104152562	S	AATAAA	96.3	2.9	6.7	6.7	kinesin light chain 1	644.246	2.2	86.7	2	86.7
WIPF1	mRNA	7456	NM_001077269	chr2	-	175435897	Ic	ATTAAA	10	11.4	0.2	6.7	WAS/WASL interacting protein family, member 1	14.965	-1.6	-0.6	6	8.8
RPL31	mRNA	6160	NM_001098577	chr2	+	101622571	Ic	OtherPAS	18.7	4.5	0.8	6.7	ribosomal protein L31	400.315	-2.3	-28.1	2	78
RPL31	mRNA	6160	NM_001098577	chr2	+	101622881	Ic	AATAAA	81.3	-4.5	-0.8	6.7	ribosomal protein L31	400.315	-2.3	-28.1	2	78
C6orf89	mRNA	221477	NM_152734	chr6	+	36892332	M	OtherPAS	70.6	-16.1	-0.8	6.7	chromosome 6 open reading frame 89	25.441	1.2	0.2	3	0.8
C6orf89	mRNA	221477	NM_152734	chr6	+	36896740	L	ATTAAA	23.5	19.7	1	6.7	chromosome 6 open reading frame 89	25.441	1.2	0.2	3	0.8
WDR1	mRNA	9948	NM_017491	chr4	-	10076104	M	ATTAAA	11.3	-0.7	0	6.6	WD repeat domain 1	39.657	-1.2	-0.6	3	29.8
EXOSC3	mRNA	51010	NM_016042	chr9	-	37780450	F	AATAAA	75.6	3.9	0.1	6.6	exosome component 3	30.678	-1	0	3	8.2
EXOSC3	mRNA	51010	NM_016042	chr9	-	37771513	L	AATAAA	24.4	-10.8	-0.6	6.6	exosome component 3	30.678	-1	0	3	8.2
INTS4	mRNA	92105	NM_033547	chr11	-	77698056	Is	OtherPAS	11.1	-6.2	-0.4	6.6	integrator complex subunit 4	20.203	1.4	0.6	2	12.3
INTS4	mRNA	92105	NM_033547	chr11	-	77589766	S	AATAAA	88.9	6.2	0.4	6.6	integrator complex subunit 4	20.203	1.4	0.6	2	12.3
ETNK1	mRNA	55500	NM_018638	chr12	+	22797349	Is	ATTAAA	95.3	-4.8	-2.1	6.6	ethanolamine kinase 1	303.043	-1.1	-1	3	28
IGF2R	mRNA	3482	NM_000876	chr6	+	160532467	L	AATAAA	25.4	10.6	1.5	6.6	insulin-like growth factor 2 receptor	97.273	2	11	4	11
RPL35A	mRNA	6165	NM_000996	chr3	+	197682688	F	AATAAA	48.2	5.3	1.3	6.6	ribosomal protein L35a	534.253	-1.2	-2.4	2	33.3
RPL35A	mRNA	6165	NM_000996	chr3	+	197682722	L	ATTAAA	51.8	-5.3	-1.3	6.6	ribosomal protein L35a	534.253	-1.2	-2.4	2	33.3
C19orf66	mRNA	55337	NM_018381	chr19	+	10203013	F	NoPAS	74.7	14.5	2.1	6.6	chromosome 19 open reading frame 66	59.112	1.8	4.9	3	13.3
CCDC9	mRNA	26093	NM_015603	chr19	+	47775210	F	AATAAA	7.6	-1.7	-0.3	6.6	coiled-coil domain containing 9	187.063	-1	-0.1	2	6
CCDC9	mRNA	26093	NM_015603	chr19	+	47777092	L	ATTAAA	92.4	1.7	0.3	6.6	coiled-coil domain containing 9	187.063	-1	-0.1	2	6
IPO5	mRNA	3843	NM_002271	chr13	+	98674136	F	AATAAA	30	-10.2	-0.7	6.5	importin 5	37.413	1.5	1.4	4	40.8
IFNGR2	mRNA	3460	NM_005534	chr21	+	34809823	S	AATAAA	66.7	33.3	1.6	6.5	interferon gamma receptor 2 (interferon gamma transducer 1)	4.49	4.2	3.4	3	3.4
C9orf9	mRNA	11092	NM_018956	chr9	+	135765417	S	AATAAA	97.2	-0.3	-0.1	6.5	chromosome 9 open reading frame 9	271.616	-1.4	-4.6	3	8.2
COL5A1	mRNA	1289	NM_000093	chr9	+	137734720	F	ATTAAA	18.4	15.2	5.2	6.5	collagen, type V, alpha 1	211.756	1.4	5.5	5	999
CPT1A	mRNA	1374	NM_001876	chr11	-	68574648	Ic	AATAAA	94.2	-38.8	-6.5	6.5	carnitine palmitoyltransferase 1A (liver)	51.629	-1.4	-1.1	3	2.9
VPS24	mRNA	51652	NM_016079	chr2	-	86732724	F	AATAAA	75.8	-33.4	-6.5	6.5	charged multivesicular body protein 3	120.469	-2.1	-7.8	3	47.5
PDCD2	mRNA	5134	NM_002598	chr6	-	170890835	Is	AATAAA	0.2	0.6	0.8	6.5	programmed cell death 2	475.141	-1.9	-22.3	4	22.3
TMEM57	mRNA	55219	NM_018202	chr1	+	25825220	F	ATTAAA	89.2	-16.3	-6.5	6.5	transmembrane protein 57	207.266	1.1	0.9	3	10
ADAM10	mRNA	102	NM_001110	chr15	-	58947445	Is	ATTAAA	61.8	-44.2	-6.5	6.5	ADAM metallopeptidase domain 10	41.154	1.2	0.5	5	0.5
ZNF264	mRNA	9422	NM_003417	chr19	+	57734214	L	ATTAAA	37.5	-20.8	-0.8	6.5	zinc finger protein 264	11.972	1.4	0.4	4	0.4
POFUT1	mRNA	23509	NM_015352	chr20	+	30822846	F	NoPAS	74	-35.2	-6.4	6.4	protein O-fucosyltransferase 1	109.245	-2	-6.6	6	6.6
SIRPA	mRNA	140885	NM_001040022	chr20	+	1919108	F	Arich	45.5	-3.8	0	6.4	signal-regulatory protein alpha	16.462	-2	-1.2	5	14.4
NONO	mRNA	4841	NM_001145408	chrX	+	70520119	F	ATTAAA	4.2	-0.7	-0.2	6.4	non-POU domain containing, octamer-binding	251.413	1.9	24.2	2	24.2
NONO	mRNA	4841	NM_001145408	chrX	+	70521018	L	ATTAAA	95.8	0.7	0.2	6.4	non-POU domain containing, octamer-binding	251.413	1.9	24.2	2	24.2
CAMK2D	mRNA	817	NM_001221	chr4	-	114373572	F	AATAAA	14	-9.6	-1.9	6.4	calcium/calmodulin-dependent protein kinase II delta	42.65	3.6	20.8	2	20.8
CAMK2D	mRNA	817	NM_001221	chr4	-	114372192	L	AATAAA	86	9.6	1.9	6.4	calcium/calmodulin-dependent protein kinase II delta	42.65	3.6	20.8	2	20.8
PFAS	mRNA	5198	NM_012393	chr17	+	8181762	L	ATTAAA	16.7	16.6	0.4	6.4	phosphoribosylformylglycinamidine synthase	8.979	2	1.4	6	11.5
DDX5	mRNA	1655	NM_004396	chr17	-	62495738	F	AATAAA	7.4	-3	-0.2	6.4	DEAD (Asp-Glu-Ala-Asp) box polypeptide 5	20.203	1.5	1	3	4.5
ATF1	mRNA	466	NM_005171	chr12	+	51213527	F	AATAAA	88.9	4.1	0.9	6.4	activating transcription factor 1	161.623	1.4	3.6	6	3.6
ATP2A2	mRNA	488	NM_170665	chr12	+	110788898	L	AATAAA	11.5	-2.5	-0.4	6.4	ATPase, Ca++ transporting, cardiac muscle, slow twitch 2	142.916	1.6	7.5	3	7.5
LBX2	mRNA	85474	NM_001009812	chr2	-	74729468	Ic	OtherPAS	31.2	-2.5	-0.1	6.4	ladybird homeobox 2	23.944	2.5	5.3	4	5.3
ZBTB24	mRNA	9841	NM_014797	chr6	-	109777921	L	AATAAA	25	-1.9	0	6.4	zinc finger and BTB domain containing 24	17.958	1.5	0.8	6	2.9
DNAH1	mRNA	25981	NM_015512	chr3	+	52351605	Ic	OtherPAS	100	-3.8	-0.3	6.4	dynein, axonemal, heavy chain 1	20.203	1.7	1.7	3	18.6
NENF	mRNA	29937	NM_013349	chr1	+	212619480	F	AATAAA	12.6	10.9	2.5	6.4	neudesin neurotrophic factor	160.126	1	0.1	2	10.9
NENF	mRNA	29937	NM_013349	chr1	+	212619721	L	AATAAA	87.4	-10.9	-2.5	6.4	neudesin neurotrophic factor	160.126	1	0.1	2	10.9
ELK4	mRNA	2005	NM_001973	chr1	-	205577071	L	AATAAA	20	5	0	6.4	ELK4, ETS-domain protein (SRF accessory protein 1)	7.483	1.1	0	4	1.1
NIPAL3	mRNA	57185	NM_020448	chr1	+	24803229	L	OtherPAS	3	20.3	2.8	6.4	NIPA-like domain containing 3	49.385	-1.7	-2.1	4	2.4
GTF2F1	mRNA	2962	NM_002096	chr19	-	6380258	F	OtherPAS	28.9	3.5	0.1	6.4	general transcription factor IIF, polypeptide 1, 74kDa	28.434	-1.2	-0.4	6	1.4
GABARAPL2	mRNA	11345	NM_007285	chr16	+	75611779	L	AATAAA	81.8	6.1	0.3	6.3	GABA(A) receptor-associated protein-like 2	24.692	1.6	1.4	3	18.9
ADO	mRNA	84890	NM_032804	chr10	+	64570865	M	OtherPAS	8	14	0.7	6.3	2-aminoethanethiol (cysteamine) dioxygenase	18.706	1.8	1.8	7	1.8
LDHA	mRNA	3939	NM_001165414	chr11	+	18429394	M	AATAAA	10.4	-1	-0.1	6.3	lactate dehydrogenase A	57.615	1.4	1.5	6	42.1
ABCC3	mRNA	8714	NM_003786	chr17	+	48739110	Ic	NoPAS	21.5	-18.3	-6.3	6.3	ATP-binding cassette, sub-family C (CFTR/MRP), member 3	205.77	-2.5	-17.3	6	17.3
VIPAR	mRNA	63894	NM_001193314	chr14	-	77916204	Ic	AATAAA	15	57.2	6.3	6.3	chromosome 14 open reading frame 133	29.93	-1.2	-0.4	3	0.4
VIPAR	mRNA	63894	NM_001193314	chr14	-	77893018	S	AATAAA	85	-57.2	-6.3	6.3	chromosome 14 open reading frame 133	29.93	-1.2	-0.4	3	0.4
COL6A3	mRNA	1293	NM_004369	chr2	-	238295093	Is	AATAAA	5.1	32	6.3	6.3	collagen, type VI, alpha 3	58.364	1	0.1	4	999
GFPT1	mRNA	2673	NM_002056	chr2	-	69553187	F	OtherPAS	36.8	-35.4	-6.3	6.3	glutamine--fructose-6-phosphate transaminase 1	28.434	1.8	2.4	5	27.1
ABL2	mRNA	27	NM_007314	chr1	-	179076275	F	OtherPAS	95.9	-15.6	-6.3	6.3	v-abl Abelson murine leukemia viral oncogene homolog 2	147.406	1	0.1	3	15.2
ABHD2	mRNA	11057	NM_007011	chr15	+	89745586	L	AATAAA	56	34.1	6.3	6.3	abhydrolase domain containing 2	68.091	-1.2	-0.8	3	19.8
DNASE2	mRNA	1777	NM_001375	chr19	-	12986023	L	AATAAA	12.3	-3.1	-0.4	6.3	deoxyribonuclease II, lysosomal	127.951	-1.1	-0.4	3	23.7
RPL28	mRNA	6158	NM_001136134	chr19	+	55903453	L	AATAAA	32.1	-8	-0.9	6.3	ribosomal protein L28	125.707	-1.1	-0.6	3	999
GALNT1	mRNA	2589	NM_020474	chr18	+	33290960	M	AATAAA	28.6	21.4	0.5	6.2	UDP-N-acetyl-alpha-D-galactosamine:polypeptide N-acetylgalactosaminyltransferase 1 (GalNAc-T1)	15.713	-1.5	-0.5	4	7.3
ADO	mRNA	84890	NM_032804	chr10	+	64567096	F	AATAAA	8	-2	0	6.2	2-aminoethanethiol (cysteamine) dioxygenase	18.706	1.8	1.8	7	1.8
MTA2	mRNA	9219	NM_004739	chr11	-	62360740	F	AATAAA	65.8	-0.3	0	6.2	metastasis associated 1 family, member 2	139.923	-1.5	-3.4	3	67.2
APOLD1	mRNA	81575	NM_001130415	chr12	+	12879215	Ic	ATTAAA	5.9	6.6	0.2	6.2	apolipoprotein L domain containing 1	12.72	6	15.7	4	15.7
NCOR2	mRNA	9612	NM_006312	chr12	-	124808961	S	ATTAAA	74.1	-52.7	-2.6	6.2	nuclear receptor corepressor 2	20.203	-2.1	-1.7	5	5.3
TMTC1	mRNA	83857	NM_175861	chr12	-	29658914	F	ATTAAA	6.9	-6.9	-0.7	6.2	transmembrane and tetratricopeptide repeat containing 1	21.699	1.1	0.1	5	1.6
ASB1	mRNA	51665	NM_001040445	chr2	+	239360891	L	AATAAA	4.4	10.2	3.4	6.2	ankyrin repeat and SOCS box containing 1	168.357	-1.2	-1.3	3	8.4
WDR61	mRNA	80349	NM_025234	chr15	-	78575577	F	OtherPAS	57.1	-44.6	-1.5	6.2	WD repeat domain 61	5.238	3.1	2.2	3	3.9
DIAPH2	mRNA	1730	NM_006729	chrX	+	96855597	F	AATAAA	97.8	-15.9	-6.1	6.1	diaphanous homolog 2 (Drosophila)	172.846	-2.4	-14.4	3	14.4
KCTD1	mRNA	284252	NM_001142730	chr18	-	24124931	Ic	AATAAA	75	13.1	0.9	6.1	potassium channel tetramerisation domain containing 1	23.944	1.7	1.7	7	4.2
INTS10	mRNA	55174	NM_018142	chr8	+	19701714	E	AATAAA	92.6	5.2	1.8	6.1	integrator complex subunit 10	111.49	1.7	6.6	3	6.6
PMM2	mRNA	5373	NM_000303	chr16	+	8943182	S	ATTAAA	5.6	-5.6	0	6.1	phosphomannomutase 2	13.469	-2.2	-1.3	3	1.7
CD59	mRNA	966	NM_001127223	chr11	-	33730981	M	NoPAS	6.2	1.5	0.3	6.1	CD59 molecule, complement regulatory protein	193.798	1.6	9.7	5	33.2
DUSP3	mRNA	1845	NM_004090	chr17	-	41843493	L	AATAAA	53.4	-0.8	0	6.1	dual specificity phosphatase 3	43.399	1.2	0.6	4	13
RABEP1	mRNA	9135	NM_004703	chr17	+	5287037	F	ATTAAA	55	-4.1	-0.2	6.1	rabaptin, RAB GTPase binding effector protein 1	44.895	1.7	3	5	3
RPS29	mRNA	6235	NM_001030001	chr14	-	50053620	UA	AATAAA	4.5	2.3	0.3	6.1	ribosomal protein S29	66.595	-1.1	-0.3	2	10.3
RPS29	mRNA	6235	NM_001030001	chr14	-	50050295	Is	AATAAA	95.5	-2.3	-0.3	6.1	ribosomal protein S29	66.595	-1.1	-0.3	2	10.3
PPP2R5C	mRNA	5527	NM_001161725	chr14	+	102378962	Ic	AATAAA	37	42.5	4.3	6.1	protein phosphatase 2, regulatory subunit B', gamma	34.42	-1.2	-0.3	6	1
MCFD2	mRNA	90411	NM_001171508	chr2	-	47132376	F	ATTAAA	13.5	-7.5	-1.4	6.1	multiple coagulation factor deficiency 2	71.832	2	8.6	3	8.6
VPS24	mRNA	51652	NM_016079	chr2	-	86730558	L	AATAAA	24.2	32.3	6.1	6.1	charged multivesicular body protein 3	120.469	-2.1	-7.8	3	47.5
VCAN	mRNA	1462	NM_004385	chr5	+	82880950	L	AATAAA	8.7	34.6	6.1	6.1	versican	68.839	-1.7	-2.8	6	2.8
CAST	mRNA	831	NM_001042440	chr5	+	96108758	M	OtherPAS	40.5	-30.3	-6.1	6.1	calpastatin	90.539	-1.5	-2.5	6	28.9
KAT8	mRNA	84148	NM_182958	chr16	+	31142706	L	NoPAS	0	24.6	6	6	K(lysine) acetyltransferase 8	57.615	-1.2	-0.7	5	1.5
SEPHS1	mRNA	22929	NM_012247	chr10	-	13360980	F	AATAAA	100	-6.9	0	6	selenophosphate synthetase 1	8.231	4.8	7.1	3	27.2
GLRX3	mRNA	10539	NM_001199868	chr10	+	131981907	L	AATAAA	1.2	-0.8	-0.4	6	glutaredoxin 3	239.441	-1.4	-3.8	3	27
ZFAND5	mRNA	7763	NM_001102420	chr9	-	74969374	M	AATAAA	93.3	-1.1	-0.4	6	zinc finger, AN1-type domain 5	671.183	-1.1	-1.8	5	50.8
ZMIZ2	mRNA	83637	NM_031449	chr7	+	44807215	F	NoPAS	2.6	0.2	0.1	6	zinc finger, MIZ-type containing 2	636.015	1.3	6.8	3	6.8
SLC6A15	mRNA	55117	NM_182767	chr12	-	85274627	Ic	AATAAA	1.3	4.9	0.8	6	solute carrier family 6 (neutral amino acid transporter), member 15	59.112	1.5	2.1	2	21.2
SLC6A15	mRNA	55117	NM_182767	chr12	-	85253498	S	AATAAA	98.7	-4.9	-0.8	6	solute carrier family 6 (neutral amino acid transporter), member 15	59.112	1.5	2.1	2	21.2
ABI2	mRNA	10152	NM_005759	chr2	+	204292321	F	AATAAA	11.2	-8.2	-1.8	6	abl-interactor 2	80.063	1.1	0.5	4	19.3
WIPF1	mRNA	7456	NM_001077269	chr2	-	175424302	L	AATAAA	50	-14.3	-0.3	6	WAS/WASL interacting protein family, member 1	14.965	-1.6	-0.6	6	8.8
ZBTB38	mRNA	253461	NM_001080412	chr3	+	141132022	Is	AATAAA	0	7.3	1	6	zinc finger and BTB domain containing 38	36.664	-1.3	-0.7	7	15.2
FEM1B	mRNA	10116	NM_015322	chr15	+	68588203	L	OtherPAS	57.1	16.2	0.3	6	fem-1 homolog b (C. elegans)	15.713	-1.5	-0.6	4	1.2
MAPK6	mRNA	5597	NM_002748	chr15	+	52309364	UA	AATAAA	73.2	-43.8	-6	6	mitogen-activated protein kinase 6	30.678	2.8	8.9	3	8.9
ARFRP1	mRNA	10139	NM_001134758	chr20	-	62330864	F	AATAAA	95	-2.9	-2.4	5.9	ADP-ribosylation factor related protein 1	761.722	1.3	10.5	2	17.6
ARFRP1	mRNA	10139	NM_001134758	chr20	-	62330809	L	NoPAS	5	2.9	2.4	5.9	ADP-ribosylation factor related protein 1	761.722	1.3	10.5	2	17.6
CLYBL	mRNA	171425	NM_206808	chr13	+	100517488	Ic	AATAAA	5.6	1.1	0	5.9	citrate lyase beta like	13.469	-1.3	-0.3	4	8.1
BEAN1	mRNA	146227	NM_001178020	chr16	+	66471924	Ic	AATAAA	50	-8.6	-0.2	5.9	brain expressed, associated with NEDD4, 1	17.958	1.1	0.1	3	1.8
CSTB	mRNA	1476	NM_000100	chr21	-	45193831	F	OtherPAS	70	-22.5	-1.4	5.9	cystatin B (stefin B)	44.895	-1.7	-1.9	5	12.4
ACO1	mRNA	48	NM_002197	chr9	+	32454370	L	OtherPAS	10.9	-5.3	-0.6	5.9	aconitase 1, soluble	47.888	1.3	0.8	4	11.3
STXBP1	mRNA	6812	NM_003165	chr9	+	130454978	L	AATAAA	30	21.3	0.8	5.9	syntaxin binding protein 1	14.965	1.8	1.4	3	6
ZMIZ2	mRNA	83637	NM_031449	chr7	+	44809480	L	OtherPAS	19.6	9.4	5.9	5.9	zinc finger, MIZ-type containing 2	636.015	1.3	6.8	3	6.8
MIOS	mRNA	54468	NM_019005	chr7	+	7646860	F	AATAAA	92	-74.4	-5.9	5.9	missing oocyte, meiosis regulator, homolog (Drosophila)	18.706	-1.6	-0.9	5	3.1
CTDNEP1	mRNA	23399	NM_015343	chr17	-	7147158	F	NoPAS	0	0.5	0.5	5.9	CTD nuclear envelope phosphatase 1	303.043	2.1	35.5	3	35.5
GOSR2	mRNA	9570	NM_004287	chr17	+	45014188	Ic	OtherPAS	7.7	5.5	1	5.9	golgi SNAP receptor complex member 2	135.434	-1.3	-1.5	7	20.5
TM9SF1	mRNA	10548	NM_006405	chr14	-	24658355	S	AATAAA	20	-6.1	-0.4	5.9	transmembrane 9 superfamily member 1	48.636	1.1	0.2	4	7.2
TMCO4	mRNA	255104	NM_181719	chr1	-	20008733	F	AATAAA	68.9	-21.4	-1.6	5.9	transmembrane and coiled-coil domains 4	45.643	-1.1	-0.3	5	11
RPS23	mRNA	6228	NM_001025	chr5	-	81571879	F	AATAAA	98.7	0.3	0.2	5.9	ribosomal protein S23	918.855	-1.3	-8.5	2	8.5
RPS23	mRNA	6228	NM_001025	chr5	-	81571632	L	AATAAA	1.3	-0.3	-0.2	5.9	ribosomal protein S23	918.855	-1.3	-8.5	2	8.5
NDFIP1	mRNA	80762	NM_030571	chr5	+	141524256	Ic	ATTAAA	3.3	22	5.9	5.9	Nedd4 family interacting protein 1	112.986	-2.2	-8.2	4	8.2
CEP89	mRNA	84902	NM_032816	chr19	-	33369915	F	AATAAA	14	-2.5	-0.2	5.9	centrosomal protein 89kDa	69.588	1.9	6.3	4	15.7
LOC100131089	lncRNA	100131089	NR_040059	chr15	+	40357725	F	NoPAS	22.2	7.5	0.1	5.9	uncharacterized LOC100131089	13.469	1.9	1.5	5	1.5
CD40	mRNA	958	NM_001250	chr20	+	44762884	L	ATTAAA	NA	NA	NA	5.8	CD40 molecule, TNF receptor superfamily member 5	0	999	0	6	13.9
POFUT1	mRNA	23509	NM_015352	chr20	+	30825871	M	OtherPAS	11	-7.2	-1.1	5.8	protein O-fucosyltransferase 1	109.245	-2	-6.6	6	6.6
NDUFA5	mRNA	4698	NM_005000	chr7	-	123182111	F	ATTAAA	0	0	NA	5.8	NADH dehydrogenase (ubiquinone) 1 alpha subcomplex, 5, 13kDa	269.371	1.8	19.9	2	19.9
NDUFA5	mRNA	4698	NM_005000	chr7	-	123181083	L	AATAAA	100	0	0	5.8	NADH dehydrogenase (ubiquinone) 1 alpha subcomplex, 5, 13kDa	269.371	1.8	19.9	2	19.9
NCKAP1	mRNA	10787	NM_205842	chr2	-	183789615	F	AATAAA	91.7	-11.2	-1.4	5.8	NCK-associated protein 1	62.853	-1.1	-0.4	2	1.1
NCKAP1	mRNA	10787	NM_205842	chr2	-	183773843	L	AATAAA	8.3	11.2	1.4	5.8	NCK-associated protein 1	62.853	-1.1	-0.4	2	1.1
IGF2R	mRNA	3482	NM_000876	chr6	+	160527915	M	AATAAA	66.2	-5.6	-0.5	5.8	insulin-like growth factor 2 receptor	97.273	2	11	4	11
KCNC4	mRNA	3749	NM_004978	chr1	+	110790878	M	AATAAA	0	0	NA	5.8	potassium voltage-gated channel, Shaw-related subfamily, member 4	113.734	1	0	5	1.1
LNPEP	mRNA	4012	NM_005575	chr5	+	96373217	L	AATAAA	0	0	NA	5.8	leucyl/cystinyl aminopeptidase	5.986	-2.2	-0.6	6	0.6
DIAPH2	mRNA	1730	NM_006729	chrX	+	96724835	Is	OtherPAS	2.2	14.9	5.7	5.7	diaphanous homolog 2 (Drosophila)	172.846	-2.4	-14.4	3	14.4
OGT	mRNA	8473	NM_181672	chrX	+	70794202	F	OtherPAS	27.3	13.2	1.3	5.7	O-linked N-acetylglucosamine (GlcNAc) transferase (UDP-N-acetylglucosamine:polypeptide-N-acetylglucosaminyl transferase)	65.846	1.1	0.4	2	6.6
OGT	mRNA	8473	NM_181672	chrX	+	70795742	L	AATAAA	72.7	-13.2	-1.3	5.7	O-linked N-acetylglucosamine (GlcNAc) transferase (UDP-N-acetylglucosamine:polypeptide-N-acetylglucosaminyl transferase)	65.846	1.1	0.4	2	6.6
AP1S2	mRNA	8905	NM_003916	chrX	-	15843931	M	AATAAA	25	8.3	0.2	5.7	adaptor-related protein complex 1, sigma 2 subunit	23.944	-5.9	-5.4	4	5.4
PCDH9	mRNA	5101	NM_203487	chr13	-	66876966	S	AATAAA	0	NA	NA	5.7	protocadherin 9	0.748	-999	-0.3	5	0.6
C10orf128	mRNA	170371	NM_001010863	chr10	-	50365918	Ic	OtherPAS	6.7	-6.7	-1.6	5.7	chromosome 10 open reading frame 128	33.671	2.1	5	4	8.8
CHCHD1	mRNA	118487	NM_203298	chr10	+	75543131	F	AATAAA	91.1	2.4	0.1	5.7	coiled-coil-helix-coiled-coil-helix domain containing 1	41.902	0	0	3	39.2
IFNGR2	mRNA	3460	NM_005534	chr21	+	34794254	Ic	AATAAA	16.7	-16.7	-0.8	5.7	interferon gamma receptor 2 (interferon gamma transducer 1)	4.49	4.2	3.4	3	3.4
TRAF1	mRNA	7185	NM_005658	chr9	-	123666247	F	Arich	31.6	-31.6	-0.3	5.7	TNF receptor-associated factor 1	14.217	-7	-3.5	3	3.5
ORAI2	mRNA	80228	NM_001126340	chr7	+	102090185	M	AATAAA	0	0	NA	5.7	ORAI calcium release-activated calcium modulator 2	22.448	2.5	5.1	6	5.1
CPT1A	mRNA	1374	NM_001876	chr11	-	68522357	S	AATAAA	5.8	35.3	5.7	5.7	carnitine palmitoyltransferase 1A (liver)	51.629	-1.4	-1.1	3	2.9
CCND1	mRNA	595	NM_053056	chr11	+	69456448	Ic	AATAAA	5.3	1.7	0	5.7	cyclin D1	42.65	-1.1	-0.2	6	38.5
PPP1R11	mRNA	6992	NM_021959	chr6	+	30038110	M	AATAAA	77.3	1.5	0	5.7	protein phosphatase 1, regulatory (inhibitor) subunit 11	56.119	-1.6	-2	3	2
NTPCR	mRNA	84284	NM_032324	chr1	+	233114397	M	ATTAAA	79.6	-19.3	-4.3	5.7	nucleoside-triphosphatase, cancer-related	183.322	-1.8	-8	5	8
CAPN2	mRNA	824	NM_001748	chr1	+	223963720	L	ATTAAA	0	0.3	0	5.7	calpain 2, (m/II) large subunit	50.881	4.6	39.7	6	70.9
CNN3	mRNA	1266	NM_001839	chr1	-	95362764	F	AATAAA	92.1	0.7	0	5.7	calponin 3, acidic	351.679	-4.2	-55.3	2	63.5
CNN3	mRNA	1266	NM_001839	chr1	-	95362513	L	AATAAA	7.9	-0.7	0	5.7	calponin 3, acidic	351.679	-4.2	-55.3	2	63.5
G3BP1	mRNA	10146	NM_005754	chr5	+	151184556	F	NoPAS	80.2	1	0.1	5.7	GTPase activating protein (SH3 domain) binding protein 1	282.84	-2.2	-19	4	19
WDR61	mRNA	80349	NM_025234	chr15	-	78566000	L	AATAAA	14.3	52.4	1.6	5.7	WD repeat domain 61	5.238	3.1	2.2	3	3.9
PTPLAD1	mRNA	51495	NM_016395	chr15	+	65868856	F	ATTAAA	87.5	-24.3	-1.8	5.7	protein tyrosine phosphatase-like A domain containing 1	29.93	-1.2	-0.3	3	3.8
PTPLAD1	mRNA	51495	NM_016395	chr15	+	65870687	L	ATTAAA	5	31.8	3.2	5.7	protein tyrosine phosphatase-like A domain containing 1	29.93	-1.2	-0.3	3	3.8
FBXO17	mRNA	115290	NM_024907	chr19	-	39432041	S	NoPAS	33.3	6.7	0	5.7	F-box protein 17	11.224	-1.7	-0.6	6	6.5
DIDO1	mRNA	11083	NM_033081	chr20	-	61533706	Is	Arich	7.9	-6.3	-5.6	5.6	death inducer-obliterator 1	264.133	1.6	11.6	4	16.7
FAM70B	mRNA	348013	NM_182614	chr13	+	114502633	Ic	ATTAAA	88.2	8	0.7	5.6	family with sequence similarity 70, member B	12.72	4.2	8.8	2	8.8
FAM70B	mRNA	348013	NM_182614	chr13	+	114515224	S	NoPAS	11.8	-8	-0.7	5.6	family with sequence similarity 70, member B	12.72	4.2	8.8	2	8.8
RNF40	mRNA	9810	NM_014771	chr16	+	30787627	M	AATAAA	22.8	-15.8	-5.6	5.6	ring finger protein 40	127.951	1.6	5.8	4	8.7
ATP5J	mRNA	522	NM_001003703	chr21	-	27096811	L	AATAAA	43.2	9.2	0.4	5.6	ATP synthase, H+ transporting, mitochondrial Fo complex, subunit F6	27.685	1.5	1.4	3	15.7
ZMIZ2	mRNA	83637	NM_031449	chr7	+	44808292	M	ATTAAA	77.8	-9.6	-5.6	5.6	zinc finger, MIZ-type containing 2	636.015	1.3	6.8	3	6.8
DUSP3	mRNA	1845	NM_004090	chr17	-	41845674	M	OtherPAS	19	0.2	0	5.6	dual specificity phosphatase 3	43.399	1.2	0.6	4	13
DNAL1	mRNA	83544	NM_001201366	chr14	+	74175880	M	AATAAA	51.3	22	1.1	5.6	dynein, axonemal, light chain 1	29.182	-1.4	-0.8	7	5.5
NRP2	mRNA	8828	NM_201266	chr2	+	206608422	Ic	AATAAA	2	16.5	5.6	5.6	neuropilin 2	229.714	-5.2	-43.7	12	43.7
HADHB	mRNA	3032	NM_000183	chr2	+	26512968	F	ATTAAA	23.6	5.4	0.6	5.6	hydroxyacyl-CoA dehydrogenase/3-ketoacyl-CoA thiolase/enoyl-CoA hydratase (trifunctional protein), beta subunit	158.63	-1.4	-2.8	2	2.8
HADHB	mRNA	3032	NM_000183	chr2	+	26513333	L	AATAAA	76.4	-5.4	-0.6	5.6	hydroxyacyl-CoA dehydrogenase/3-ketoacyl-CoA thiolase/enoyl-CoA hydratase (trifunctional protein), beta subunit	158.63	-1.4	-2.8	2	2.8
HNRPLL	mRNA	92906	NM_138394	chr2	-	38791174	F	AATAAA	51.9	8.1	0.2	5.6	heterogeneous nuclear ribonucleoprotein L-like	20.203	1	0	4	6.9
ASB1	mRNA	51665	NM_001040445	chr2	+	239355608	M	OtherPAS	73.8	-13.6	-2.5	5.6	ankyrin repeat and SOCS box containing 1	168.357	-1.2	-1.3	3	8.4
DCBLD2	mRNA	131566	NM_080927	chr3	-	98517491	F	OtherPAS	11.9	1	0.2	5.6	discoidin, CUB and LCCL domain containing 2	621.05	-1.6	-16	5	100.3
C1orf183	mRNA	55924	NM_019099	chr1	-	112266517	M	NoPAS	74.2	-22.3	-5.6	5.6	family with sequence similarity 212, member B	310.525	-3.5	-41.4	5	41.4
NFASC	mRNA	23114	NM_001005388	chr1	+	204987499	M	ATTAAA	5.9	13	0.4	5.6	neurofascin	12.72	2	1.7	5	4.4
FOXJ3	mRNA	22887	NM_001198851	chr1	-	42645004	F	OtherPAS	100	0	0	5.6	forkhead box J3	14.965	1.7	1.3	2	4.1
FOXJ3	mRNA	22887	NM_001198851	chr1	-	42642219	L	AATAAA	0	0	NA	5.6	forkhead box J3	14.965	1.7	1.3	2	4.1
UQCR11	mRNA	10975	NM_006830	chr19	-	1595502	L	OtherPAS	15.7	-4.6	-0.4	5.6	ubiquinol-cytochrome c reductase, complex III subunit XI	62.105	1.3	1	3	4.4
GNL3L	mRNA	54552	NM_001184819	chrX	+	54591709	M	OtherPAS	1.9	13.9	1.3	5.5	guanine nucleotide binding protein-like 3 (nucleolar)-like	40.406	-3.1	-5.3	5	5.3
PMM2	mRNA	5373	NM_000303	chr16	+	8905035	E	NoPAS	77.8	0	0	5.5	phosphomannomutase 2	13.469	-2.2	-1.3	3	1.7
ATP5J	mRNA	522	NM_001003703	chr21	-	27096856	F	AATAAA	56.8	-17.1	-0.8	5.5	ATP synthase, H+ transporting, mitochondrial Fo complex, subunit F6	27.685	1.5	1.4	3	15.7
THOC4	mRNA	10189	NM_005782	chr17	-	79845720	F	AATAAA	98.6	-24.2	-5.5	5.5	THO complex 4	53.126	1.5	2.1	2	152.7
THOC4	mRNA	10189	NM_005782	chr17	-	79836299	L	AATAAA	1.4	24.2	5.5	5.5	THO complex 4	53.126	1.5	2.1	2	152.7
C12orf75	mRNA	387882	NM_001145199	chr12	+	105765031	F	AATAAA	93.8	-15.8	-1.2	5.5	chromosome 12 open reading frame 75	23.944	1.4	0.8	2	33
C12orf75	mRNA	387882	NM_001145199	chr12	+	105765296	L	ATTAAA	6.2	15.8	1.2	5.5	chromosome 12 open reading frame 75	23.944	1.4	0.8	2	33
UHRF1BP1L	mRNA	23074	NM_015054	chr12	-	100463686	Is	AATAAA	30.2	8.4	0.3	5.5	UHRF1 binding protein 1-like	32.175	-1.1	-0.1	4	1.6
CORO1C	mRNA	23603	NM_014325	chr12	-	109040345	M	NoPAS	51	-16.4	-1.2	5.5	coronin, actin binding protein, 1C	76.322	-2.2	-5.5	4	15.5
FNDC3B	mRNA	64778	NM_022763	chr3	+	172116569	F	AATAAA	66.7	12.5	0.4	5.5	fibronectin type III domain containing 3B	8.979	1.8	1	5	3.6
DNAH1	mRNA	25981	NM_015512	chr3	+	52434508	F	ATTAAA	0	3.8	0.3	5.5	dynein, axonemal, heavy chain 1	20.203	1.7	1.7	3	18.6
RER1	mRNA	11079	NM_007033	chr1	+	2334656	F	OtherPAS	1.5	2.2	1.5	5.5	RER1 retention in endoplasmic reticulum 1 homolog (S. cerevisiae)	435.483	-1.3	-4.9	4	5.7
RABGGTB	mRNA	5876	NM_004582	chr1	+	76260476	F	AATAAA	90.5	-19.1	-0.6	5.5	Rab geranylgeranyltransferase, beta subunit	15.713	-1.1	-0.1	4	2.1
TBC1D17	mRNA	79735	NM_024682	chr19	+	50388791	Is	Arich	0	0	NA	5.5	TBC1 domain family, member 17	14.965	-1.2	-0.2	2	0.5
TBC1D17	mRNA	79735	NM_024682	chr19	+	50392001	S	ATTAAA	100	0	0	5.5	TBC1 domain family, member 17	14.965	-1.2	-0.2	2	0.5
CNOT7	mRNA	29883	NM_013354	chr8	-	17086737	F	AATAAA	0	0	NA	5.4	CCR4-NOT transcription complex, subunit 7	1.497	4.1	1.2	6	1.2
RAB2A	mRNA	5862	NM_002865	chr8	+	61533500	F	AATAAA	22	-16.5	-5.4	5.4	RAB2A, member RAS oncogene family	105.504	1.5	4	4	12.1
FAM114A1	mRNA	92689	NM_138389	chr4	+	38946563	F	AATAAA	56.5	-37.5	-1.8	5.4	family with sequence similarity 114, member A1	17.21	-1.2	-0.3	5	3.7
DCUN1D4	mRNA	23142	NM_001040402	chr4	+	52780972	M	AATAAA	5.9	10.8	0.3	5.4	DCN1, defective in cullin neddylation 1, domain containing 4 (S. cerevisiae)	12.72	-1.6	-0.6	5	0.6
DCUN1D4	mRNA	23142	NM_001040402	chr4	+	52783003	L	AATAAA	47.1	-5.4	0	5.4	DCN1, defective in cullin neddylation 1, domain containing 4 (S. cerevisiae)	12.72	-1.6	-0.6	5	0.6
MRPS18C	mRNA	51023	NM_016067	chr4	+	84382390	F	AATAAA	29.3	15.6	2.5	5.4	mitochondrial ribosomal protein S18C	140.672	-1.3	-2	2	23.2
MRPS18C	mRNA	51023	NM_016067	chr4	+	84382576	L	AATAAA	70.7	-15.6	-2.5	5.4	mitochondrial ribosomal protein S18C	140.672	-1.3	-2	2	23.2
COPZ2	mRNA	51226	NM_016429	chr17	-	46103533	L	AATAAA	33.3	9.4	0.3	5.4	coatomer protein complex, subunit zeta 2	20.203	2.5	4.8	3	10.4
SLC38A10	mRNA	124565	NM_001037984	chr17	-	79224670	Ic	AATAAA	54.3	-28.2	-1.2	5.4	solute carrier family 38, member 10	26.189	-1.7	-1.2	7	6.5
PPP2R5C	mRNA	5527	NM_001161725	chr14	+	102394314	L	AATAAA	21.7	-10.3	-0.6	5.4	protein phosphatase 2, regulatory subunit B', gamma	34.42	-1.2	-0.3	6	1
C2orf89	mRNA	129293	NM_001080824	chr2	-	85048790	S	AATAAA	80	3.3	0	5.4	chromosome 2 open reading frame 89	3.741	5.4	4.2	3	4.2
PRPF4B	mRNA	8899	NM_003913	chr6	+	4062139	F	AATAAA	83.3	3.5	0.1	5.4	PRP4 pre-mRNA processing factor 4 homolog B (yeast)	31.427	-1.2	-0.4	2	2.5
PRPF4B	mRNA	8899	NM_003913	chr6	+	4065217	L	AATAAA	16.7	-3.5	-0.1	5.4	PRP4 pre-mRNA processing factor 4 homolog B (yeast)	31.427	-1.2	-0.4	2	2.5
ARIH1	mRNA	25820	NM_005744	chr15	+	72875886	F	OtherPAS	37.3	-29	-5.4	5.4	ariadne homolog, ubiquitin-conjugating enzyme E2 binding protein, 1 (Drosophila)	44.147	2	5.4	2	5.4
ARIH1	mRNA	25820	NM_005744	chr15	+	72878896	L	AATAAA	62.7	29	5.4	5.4	ariadne homolog, ubiquitin-conjugating enzyme E2 binding protein, 1 (Drosophila)	44.147	2	5.4	2	5.4
NARG2	mRNA	79664	NM_024611	chr15	-	60739165	Ic	AATAAA	75	-5	0	5.4	NMDA receptor regulated 2	14.965	-2.2	-1.4	6	1.4
CSTF1	mRNA	1477	NM_001324	chr20	+	54979311	M	AATAAA	66.7	-2	0	5.3	cleavage stimulation factor, 3' pre-RNA, subunit 1, 50kDa	11.224	2	1.7	4	15.2
GMEB2	mRNA	26205	NM_012384	chr20	-	62218958	L	AATAAA	6.2	11.2	0.7	5.3	glucocorticoid modulatory element binding protein 2	23.944	-1.5	-0.9	3	1.3
AP1S2	mRNA	8905	NM_003916	chrX	-	15844193	F	AATAAA	59.4	7.3	0	5.3	adaptor-related protein complex 1, sigma 2 subunit	23.944	-5.9	-5.4	4	5.4
SLC25A5	mRNA	292	NM_001152	chrX	+	118605282	F	AATAAA	84.9	2.9	0.2	5.3	solute carrier family 25 (mitochondrial carrier; adenine nucleotide translocator), member 5	54.622	1.2	0.7	2	53.7
SLC25A5	mRNA	292	NM_001152	chrX	+	118605395	L	AATAAA	15.1	-2.9	-0.2	5.3	solute carrier family 25 (mitochondrial carrier; adenine nucleotide translocator), member 5	54.622	1.2	0.7	2	53.7
TXNL4A	mRNA	10907	NM_006701	chr18	-	77733513	F	AATAAA	81.9	-2.1	-0.1	5.3	thioredoxin-like 4A	53.874	2.8	15.4	3	15.4
PCCA	mRNA	5095	NM_000282	chr13	+	100738482	UA	AATAAA	64.1	14.2	1.8	5.3	propionyl CoA carboxylase, alpha polypeptide	106.252	-1.5	-2.6	2	8.8
PCCA	mRNA	5095	NM_000282	chr13	+	101182689	S	AATAAA	35.9	-14.2	-1.8	5.3	propionyl CoA carboxylase, alpha polypeptide	106.252	-1.5	-2.6	2	8.8
TGFB1I1	mRNA	7041	NM_001042454	chr16	+	31486660	Ic	AATAAA	6.7	3.7	0.4	5.3	transforming growth factor beta 1 induced transcript 1	56.119	1.3	0.9	2	2
TGFB1I1	mRNA	7041	NM_001042454	chr16	+	31489279	S	OtherPAS	93.3	-3.7	-0.4	5.3	transforming growth factor beta 1 induced transcript 1	56.119	1.3	0.9	2	2
VPS26A	mRNA	9559	NM_004896	chr10	+	70931477	F	AATAAA	45	5	0	5.3	vacuolar protein sorting 26 homolog A (S. pombe)	14.965	-3.7	-2.5	2	3.5
VPS26A	mRNA	9559	NM_004896	chr10	+	70932617	L	AATAAA	55	-5	0	5.3	vacuolar protein sorting 26 homolog A (S. pombe)	14.965	-3.7	-2.5	2	3.5
KDELR2	mRNA	11014	NM_006854	chr7	-	6501376	F	ATTAAA	84.3	-4.7	-1.1	5.3	KDEL (Lys-Asp-Glu-Leu) endoplasmic reticulum protein retention receptor 2	252.161	1.6	12.2	2	46.4
KDELR2	mRNA	11014	NM_006854	chr7	-	6500712	L	AATAAA	15.7	4.7	1.1	5.3	KDEL (Lys-Asp-Glu-Leu) endoplasmic reticulum protein retention receptor 2	252.161	1.6	12.2	2	46.4
RPL27A	mRNA	6157	NM_000990	chr11	+	8709077	M	ATTAAA	3	4.8	3.1	5.3	ribosomal protein L27a	378.616	-1.1	-0.8	3	45.2
MLX	mRNA	6945	NM_170607	chr17	+	40723845	F	OtherPAS	51.9	22	2.9	5.3	MAX-like protein X	60.609	1.6	3	2	6.1
MLX	mRNA	6945	NM_170607	chr17	+	40724731	L	AATAAA	48.1	-22	-2.9	5.3	MAX-like protein X	60.609	1.6	3	2	6.1
SLC38A10	mRNA	124565	NM_001037984	chr17	-	79218804	L	AATAAA	22.9	-1.2	0	5.3	solute carrier family 38, member 10	26.189	-1.7	-1.2	7	6.5
ETNK1	mRNA	55500	NM_018638	chr12	+	22843597	L	AATAAA	4.4	3.1	1.1	5.3	ethanolamine kinase 1	303.043	-1.1	-1	3	28
CORO1C	mRNA	23603	NM_014325	chr12	-	109038885	L	OtherPAS	43.1	14.6	1	5.3	coronin, actin binding protein, 1C	76.322	-2.2	-5.5	4	15.5
RPL37A	mRNA	6168	NM_000998	chr2	+	217367504	L	OtherPAS	10.9	-5.3	-0.7	5.3	ribosomal protein L37a	89.042	-1.5	-2.3	4	33.2
SHOX2	mRNA	6474	NM_003030	chr3	-	157822624	Ic	AATAAA	2.6	12.4	5.3	5.3	short stature homeobox 2	142.168	1.3	2.2	4	6.5
PRRT3	mRNA	285368	NM_207351	chr3	-	9987226	F	AATAAA	34.4	10	0.3	5.3	proline-rich transmembrane protein 3	23.944	1	0	6	0.6
SSR3	mRNA	6747	NM_007107	chr3	-	156260793	F	ATTAAA	18.5	7.4	1.6	5.3	signal sequence receptor, gamma (translocon-associated protein gamma)	335.217	-1.9	-16.1	6	16.1
LEPROT	mRNA	54741	NM_017526	chr1	+	65893692	Is	AATAAA	0	0	NA	5.3	leptin receptor overlapping transcript	13.469	1.1	0.1	8	0.3
LEPROT	mRNA	54741	NM_017526	chr1	+	65901690	L	AATAAA	50	-4.5	0	5.3	leptin receptor overlapping transcript	13.469	1.1	0.1	8	0.3
LMNA	mRNA	4000	NM_170707	chr1	+	156107657	Ic	ATTAAA	63.9	18.3	3.1	5.3	lamin A/C	174.343	-2.6	-15.6	2	45
LMNA	mRNA	4000	NM_170707	chr1	+	156109872	S	OtherPAS	36.1	-18.3	-3.1	5.3	lamin A/C	174.343	-2.6	-15.6	2	45
VCAN	mRNA	1462	NM_004385	chr5	+	82876648	F	AATAAA	82.6	-35.9	-5.3	5.3	versican	68.839	-1.7	-2.8	6	2.8
KIAA0930	mRNA	23313	NM_015264	chr22	-	45591709	M	ATTAAA	73.9	-4.1	-0.4	5.3	KIAA0930	117.476	-1.3	-1.3	4	8
KIAA0930	mRNA	23313	NM_015264	chr22	-	45588061	L	OtherPAS	21	3.5	0.3	5.3	KIAA0930	117.476	-1.3	-1.3	4	8
MICALL1	mRNA	85377	NM_033386	chr22	+	38347786	L	AATAAA	0	0	NA	5.3	MICAL-like 1	158.63	-2.7	-15.6	3	18.4
OAZ1	mRNA	4946	NM_004152	chr19	+	2273487	L	AATAAA	16.5	0.1	0	5.3	ornithine decarboxylase antizyme 1	794.645	1.4	13.7	3	263.5
AC003092.1	lncRNA	NA	ENST00000438538	chr7	+	93696052	F	AATAAA	5.1	-2.5	-0.2	5.3		29.182	3.5	14	9	75.1
RAB31	mRNA	11031	NM_006868	chr18	+	9716353	Ic	ATTAAA	14.4	15.4	1.9	5.2	RAB31, member RAS oncogene family	67.343	-1.1	-0.2	4	8.6
TCEB1	mRNA	6921	NM_001204858	chr8	-	74858838	F	AATAAA	59.5	-23.1	-3	5.2	transcription elongation factor B (SIII), polypeptide 1 (15kDa, elongin C)	83.056	-1.2	-0.9	6	23.1
ASPH	mRNA	444	NM_004318	chr8	-	62568687	Is	AATAAA	3.8	-2.3	-0.5	5.2	aspartate beta-hydroxylase	39.657	2.3	7.3	8	22.7
SLC25A37	mRNA	51312	NM_016612	chr8	+	23389350	Is	NoPAS	0	68.2	5.2	5.2	solute carrier family 25, member 37	13.469	1.1	0.1	5	7.1
JAM2	mRNA	58494	NM_021219	chr21	+	27089536	L	ATTAAA	42.9	29	2.4	5.2	junctional adhesion molecule 2	20.951	4.4	15	4	40.8
ANKS6	mRNA	203286	NM_173551	chr9	-	101543577	Ic	AATAAA	26.1	11.4	0.2	5.2	ankyrin repeat and sterile alpha motif domain containing 6	17.21	-3.2	-2.5	5	2.5
CALU	mRNA	813	NM_001199672	chr7	+	128410027	F	OtherPAS	11.7	-10.7	-5.2	5.2	calumenin	140.672	-1	-0.1	7	75
MED17	mRNA	9440	NM_004268	chr11	+	93545571	F	AATAAA	100	-9.1	-0.3	5.2	mediator complex subunit 17	8.979	1.7	0.8	3	1.1
COPZ1	mRNA	22818	NM_016057	chr12	+	54744661	F	ATTAAA	28.8	-7.6	-0.7	5.2	coatomer protein complex, subunit zeta 1	93.532	-1.3	-1.5	2	1.5
COPZ1	mRNA	22818	NM_016057	chr12	+	54745630	L	AATAAA	71.2	7.6	0.7	5.2	coatomer protein complex, subunit zeta 1	93.532	-1.3	-1.5	2	1.5
SNRNP27	mRNA	11017	NM_006857	chr2	+	70132368	L	ATTAAA	82.4	-2.4	0	5.2	small nuclear ribonucleoprotein 27kDa (U4/U6.U5)	25.441	-1.5	-0.9	3	1.4
DSE	mRNA	29940	NM_013352	chr6	+	116766020	L	AATAAA	0	0	NA	5.2	dermatan sulfate epimerase	46.392	-2	-2.8	10	2.8
MIB2	mRNA	142678	NM_080875	chr1	+	1565985	S	OtherPAS	31.6	49.8	5.2	5.2	mindbomb homolog 2 (Drosophila)	28.434	1	0	3	8.1
LEPR	mRNA	3953	NM_001003679	chr1	+	66101111	S	OtherPAS	0	4.3	0	5.2	leptin receptor	13.469	1.2	0.1	1	2.2
TMEM57	mRNA	55219	NM_018202	chr1	+	25825934	M	AATAAA	2.9	9.8	5.2	5.2	transmembrane protein 57	207.266	1.1	0.9	3	10
DAZAP1	mRNA	26528	NM_170711	chr19	+	1435136	F	AATAAA	44.2	4.3	0.3	5.2	DAZ associated protein 1	77.818	1.2	0.7	2	6.1
DAZAP1	mRNA	26528	NM_170711	chr19	+	1435683	L	AATAAA	55.8	-4.3	-0.3	5.2	DAZ associated protein 1	77.818	1.2	0.7	2	6.1
DNASE2	mRNA	1777	NM_001375	chr19	-	12986370	F	ATTAAA	67.3	4.5	0.4	5.2	deoxyribonuclease II, lysosomal	127.951	-1.1	-0.4	3	23.7
ANXA5	mRNA	308	NM_001154	chr4	-	122589152	F	AATAAA	100	-7.1	-0.7	5.1	annexin A5	44.147	-4.7	-8.2	3	8.7
PLA2G12A	mRNA	81579	NM_030821	chr4	-	110631145	L	AATAAA	29.2	13.7	0.3	5.1	phospholipase A2, group XIIA	17.958	-1.9	-1.1	8	12.2
ORAI3	mRNA	93129	NM_152288	chr16	+	30966259	M	AATAAA	16.7	-16.7	-0.3	5.1	ORAI calcium release-activated calcium modulator 3	8.979	-1.1	-0.1	4	1.2
ZNHIT3	mRNA	9326	NM_004773	chr17	+	34851600	F	AATAAA	68.2	-6.3	-0.2	5.1	zinc finger, HIT-type containing 3	32.923	-1.2	-0.3	2	0.3
ZNHIT3	mRNA	9326	NM_004773	chr17	+	34851666	L	AATAAA	31.8	6.3	0.2	5.1	zinc finger, HIT-type containing 3	32.923	-1.2	-0.3	2	0.3
KPNB1	mRNA	3837	NM_002265	chr17	+	45762028	F	AATAAA	78.2	-9.9	-3.1	5.1	karyopherin (importin) beta 1	282.091	1.4	5.3	2	30.9
KPNB1	mRNA	3837	NM_002265	chr17	+	45762871	L	AATAAA	21.8	9.9	3.1	5.1	karyopherin (importin) beta 1	282.091	1.4	5.3	2	30.9
MAX	mRNA	4149	NM_145113	chr14	-	65541916	F	AATAAA	20.6	13.8	5.1	5.1	MYC associated factor X	316.511	-1.2	-1.4	2	35.4
MAX	mRNA	4149	NM_145113	chr14	-	65541845	L	AATAAA	79.4	-13.8	-5.1	5.1	MYC associated factor X	316.511	-1.2	-1.4	2	35.4
ABI2	mRNA	10152	NM_005759	chr2	+	204296892	L	AATAAA	72.9	21.2	5.1	5.1	abl-interactor 2	80.063	1.1	0.5	4	19.3
PRKRA	mRNA	8575	NM_001139517	chr2	-	179296271	M	ATTAAA	45.7	-29.7	-1.6	5.1	protein kinase, interferon-inducible double stranded RNA dependent activator	26.189	-1.5	-1	4	2.1
ORMDL1	mRNA	94101	NM_016467	chr2	-	190636037	F	ATTAAA	97.1	-3.5	-1	5.1	ORM1-like 1 (S. cerevisiae)	157.133	-1.1	-0.3	2	3.7
ORMDL1	mRNA	94101	NM_016467	chr2	-	190635054	L	AATAAA	2.9	3.5	1	5.1	ORM1-like 1 (S. cerevisiae)	157.133	-1.1	-0.3	2	3.7
C6orf125	mRNA	84300	NM_032340	chr6	-	33665345	F	AATAAA	72.7	-22.7	-3.5	5.1	chromosome 6 open reading frame 125	98.769	-1.3	-1.4	2	21.4
C6orf125	mRNA	84300	NM_032340	chr6	-	33662070	L	OtherPAS	27.3	22.7	3.5	5.1	chromosome 6 open reading frame 125	98.769	-1.3	-1.4	2	21.4
PGM3	mRNA	5238	NM_001199917	chr6	-	83878628	F	ATTAAA	97.9	-38.4	-5.1	5.1	phosphoglucomutase 3	35.168	-1.4	-0.9	5	2.1
HEBP2	mRNA	23593	NM_014320	chr6	+	138734583	L	AATAAA	11.5	-2.4	-0.1	5.1	heme binding protein 2	45.643	1.1	0.3	3	1.1
FXR1	mRNA	8087	NM_001013439	chr3	+	180694334	F	ATTAAA	6.5	-0.8	0	5.1	fragile X mental retardation, autosomal homolog 1	68.839	-1.2	-0.5	5	13.8
NUCKS1	mRNA	64710	NM_022731	chr1	-	205686416	M	AATAAA	47.4	10.7	0.8	5.1	nuclear casein kinase and cyclin-dependent kinase substrate 1	56.867	1.2	0.8	6	20.7
LNPEP	mRNA	4012	NM_005575	chr5	+	96364740	F	AATAAA	25	25	0.3	5.1	leucyl/cystinyl aminopeptidase	5.986	-2.2	-0.6	6	0.6
RPL37	mRNA	6167	NM_000997	chr5	-	40831426	L	ATTAAA	12.5	33.7	0.8	5.1	ribosomal protein L37	5.986	1.5	0.3	3	33.7
GNAZ	mRNA	2781	NM_002073	chr22	+	23467219	L	AATAAA	41.7	-8.4	0	5.1	guanine nucleotide binding protein (G protein), alpha z polypeptide	8.979	-4.4	-1.8	4	7.5
ADRBK2	mRNA	157	NM_005160	chr22	+	26125261	L	AATAAA	58.3	-52.1	-3.3	5.1	adrenergic, beta, receptor kinase 2	26.937	-2.5	-2.7	7	9.3
CD40	mRNA	958	NM_001250	chr20	+	44758155	M	AATAAA	NA	NA	NA	5	CD40 molecule, TNF receptor superfamily member 5	0	999	0	6	13.9
LAMA5	mRNA	3911	NM_005560	chr20	-	60884214	F	AATAAA	100	-1.3	0	5	laminin, alpha 5	55.371	-1.1	-0.1	2	2.6
LAMA5	mRNA	3911	NM_005560	chr20	-	60884121	L	ATTAAA	0	1.3	0	5	laminin, alpha 5	55.371	-1.1	-0.1	2	2.6
EIF2S2	mRNA	8894	NM_003908	chr20	-	32676115	L	AATAAA	57.7	17	1.8	5	eukaryotic translation initiation factor 2, subunit 2 beta, 38kDa	77.818	-1.2	-0.8	3	41.9
SLAIN2	mRNA	57606	NM_020846	chr4	+	48426615	M	OtherPAS	0	2.3	0.6	5	SLAIN motif family, member 2	77.07	5.3	76.1	3	76.1
PITRM1	mRNA	10531	NM_001242307	chr10	-	3193368	Ic	ATTAAA	56.8	35.3	5	5	pitrilysin metallopeptidase 1	27.685	2.2	4.3	4	6.2
SEPHS1	mRNA	22929	NM_012247	chr10	-	13360080	M	AATAAA	0	0	NA	5	selenophosphate synthetase 1	8.231	4.8	7.1	3	27.2
SURF4	mRNA	6836	NM_033161	chr9	-	136229208	M	OtherPAS	42.9	-8	-2.2	5	surfeit 4	362.903	1.3	4.4	3	103.4
POLR2L	mRNA	5441	NM_021128	chr11	-	839721	L	NoPAS	24.7	7.9	0.7	5	polymerase (RNA) II (DNA directed) polypeptide L, 7.6kDa	72.581	1.3	1.6	4	35.2
ZNF219	mRNA	51222	NM_016423	chr14	-	21559914	Ic	Arich	55.8	-39.9	-5	5	zinc finger protein 219	38.909	1.1	0.2	4	10.5
PPM1A	mRNA	5494	NM_021003	chr14	+	60755273	Ic	AATAAA	18.2	2.9	0	5	protein phosphatase, Mg2+/Mn2+ dependent, 1A	8.231	1.6	0.6	5	1.4
LYRM4	mRNA	57128	NM_001164841	chr6	-	5109306	F	AATAAA	97.1	-1.4	-0.2	5	LYR motif containing 4	154.888	-1.1	-0.5	3	13.1
PFN2	mRNA	5217	NM_053024	chr3	-	149682691	L	AATAAA	60.7	6.8	0.3	5	profilin 2	45.643	1.2	0.6	3	1.4
ABCF3	mRNA	55324	NM_018358	chr3	+	183917190	L	AATAAA	1.7	5.8	1.3	5	ATP-binding cassette, sub-family F (GCN20), member 3	87.546	1.2	1	3	2.6
NFASC	mRNA	23114	NM_001005388	chr1	+	204946270	Ic	ATTAAA	70.6	-5.7	-0.1	5	neurofascin	12.72	2	1.7	5	4.4
NAV1	mRNA	89796	NM_020443	chr1	+	201796097	L	AATAAA	46	-17.8	-1.3	5	neuron navigator 1	47.14	1	0	4	19.5
ATF6	mRNA	22926	NM_007348	chr1	+	161933860	L	AATAAA	5.6	-5.6	-0.3	5	activating transcription factor 6	26.937	-1.7	-1.3	4	2.6
RNF11	mRNA	26994	NM_014372	chr1	+	51737446	F	ATTAAA	26.8	-4.8	-0.3	5	ring finger protein 11	92.035	-1.2	-0.6	5	2.2
PDPN	mRNA	10630	NM_006474	chr1	+	13942882	M	NoPAS	73.8	-10.3	-1.3	5	podoplanin	105.504	1.3	2.1	3	35.8
ENAH	mRNA	55740	NM_001008493	chr1	-	225682516	M	AATAAA	11.4	-9.7	-1.2	5	enabled homolog (Drosophila)	26.189	1.5	1.3	8	1.3
PDIA3	mRNA	2923	NM_005313	chr15	+	44063612	F	NoPAS	1.2	-0.8	-0.3	5	protein disulfide isomerase family A, member 3	128.7	1.4	3.8	4	8.3
MYO5A	mRNA	4644	NM_000259	chr15	-	52673740	Ic	AATAAA	4.8	9.1	0.4	5	myosin VA (heavy chain 12, myoxin)	15.713	1.5	1	4	6.8
CYB5R3	mRNA	1727	NM_001129819	chr22	-	43014819	M	OtherPAS	50.5	-33.3	-5	5	cytochrome b5 reductase 3	81.56	-1.9	-4.3	5	4.3
LDLR	mRNA	3949	NM_000527	chr19	+	11244492	L	ATTAAA	58.6	5.2	0.3	5	low density lipoprotein receptor	43.399	2.2	6.8	3	28.2
CCDC97	mRNA	90324	NM_052848	chr19	+	41830776	S	ATTAAA	60	-60	-2.4	5	coiled-coil domain containing 97	7.483	-1	0	7	2.4
RP11-613D13.8	lncRNA	NA	ENST00000501541	chr11	-	43965333	F	AATAAA	54.5	-49.8	-5	5		16.462	1.8	1.5	3	23.1
RP11-613D13.8	lncRNA	NA	ENST00000501541	chr11	-	43952426	M	OtherPAS	45.5	49.8	5	5		16.462	1.8	1.5	3	23.1
COX7B	mRNA	1349	NM_001866	chrX	+	77160882	F	AATAAA	0	100	0.5	4.9	cytochrome c oxidase subunit VIIb	1.497	-1.1	0	5	0.7
RNMT	mRNA	8731	NM_003799	chr18	+	13760279	F	OtherPAS	5.6	-5.6	0	4.9	RNA (guanine-7-) methyltransferase	13.469	-1.3	-0.3	2	8.9
RNMT	mRNA	8731	NM_003799	chr18	+	13764555	L	AATAAA	94.4	5.6	0	4.9	RNA (guanine-7-) methyltransferase	13.469	-1.3	-0.3	2	8.9
INTS10	mRNA	55174	NM_018142	chr8	+	19681579	Ic	AATAAA	7.4	-5.2	-1.8	4.9	integrator complex subunit 10	111.49	1.7	6.6	3	6.6
SLC30A9	mRNA	10463	NM_006345	chr4	+	42080926	Ic	AATAAA	57.1	-26.9	-3.7	4.9	solute carrier family 30 (zinc transporter), member 9	83.804	-1.4	-2	3	4.5
KCNMA1	mRNA	3778	NM_001014797	chr10	-	78644635	Ic	ATTAAA	16.7	53.9	2.7	4.9	potassium large conductance calcium-activated channel, subfamily M, alpha member 1	13.469	-1.2	-0.1	6	1.6
ITGB1	mRNA	3688	NM_002211	chr10	-	33189246	M	ATTAAA	18	-3.6	-0.3	4.9	integrin, beta 1 (fibronectin receptor, beta polypeptide, antigen CD29 includes MDF2, MSK12)	133.189	-1.9	-6.8	3	86.8
ANKS6	mRNA	203286	NM_173551	chr9	-	101494291	L	AATAAA	43.5	-6	0	4.9	ankyrin repeat and sterile alpha motif domain containing 6	17.21	-3.2	-2.5	5	2.5
ZNF655	mRNA	79027	NM_001083956	chr7	+	99162328	Ic	NoPAS	53.6	-26.4	-4.9	4.9	zinc finger protein 655	72.581	1.9	6.8	4	6.8
RAC1	mRNA	5879	NM_018890	chr7	+	6442248	F	OtherPAS	78.3	-67.8	-4.9	4.9	ras-related C3 botulinum toxin substrate 1 (rho family, small GTP binding protein Rac1)	17.21	-1.3	-0.4	4	7
VOPP1	mRNA	81552	NM_030796	chr7	-	55521258	L	AATAAA	4.8	13.7	2	4.9	vesicular, overexpressed in cancer, prosurvival protein 1	46.392	2.2	7.2	3	9.9
AKIP1	mRNA	56672	NM_182901	chr11	+	8941099	F	AATAAA	99.2	-0.7	0	4.9	A kinase (PRKA) interacting protein 1	92.783	1.5	3.3	2	78.4
AKIP1	mRNA	56672	NM_182901	chr11	+	8941626	L	AATAAA	0.8	0.7	0	4.9	A kinase (PRKA) interacting protein 1	92.783	1.5	3.3	2	78.4
SMAGP	mRNA	57228	NM_001031628	chr12	-	51665146	UA	AATAAA	0	2.7	0	4.9	small cell adhesion glycoprotein	20.203	3.8	11.2	3	81.3
GATC	mRNA	283459	NM_176818	chr12	+	120899390	M	AATAAA	98.3	-18.8	-4.9	4.9	glutamyl-tRNA(Gln) amidotransferase, subunit C homolog (bacterial)	86.797	-1.6	-3.2	3	20.2
TTL	mRNA	150465	NM_153712	chr2	+	113289983	F	OtherPAS	47.1	50.6	4.9	4.9	tubulin tyrosine ligase	12.72	2.3	2.7	5	14.2
PDIA6	mRNA	10130	NM_005742	chr2	-	10924118	F	Arich	6.2	-3	-0.4	4.9	protein disulfide isomerase family A, member 6	35.916	1.8	3	4	8.1
MTHFD2	mRNA	10797	NM_006636	chr2	+	74442425	M	AATAAA	5.9	-5.9	-0.3	4.9	methylenetetrahydrofolate dehydrogenase (NADP+ dependent) 2, methenyltetrahydrofolate cyclohydrolase	12.72	1	0	7	0.4
PDCD2	mRNA	5134	NM_002598	chr6	-	170886522	F	OtherPAS	14	-1.9	-0.4	4.9	programmed cell death 2	475.141	-1.9	-22.3	4	22.3
CRTAP	mRNA	10491	NM_006371	chr3	+	33186522	L	AATAAA	63.5	4.3	0.5	4.9	cartilage associated protein	190.805	1	0	5	47.2
NAA50	mRNA	80218	NM_025146	chr3	-	113432174	M	AATAAA	0	3.1	0.3	4.9	N(alpha)-acetyltransferase 50, NatE catalytic subunit	28.434	-1.3	-0.6	10	9.1
DHDDS	mRNA	79947	NM_024887	chr1	+	26794018	Is	OtherPAS	13.3	35.8	4.9	4.9	dehydrodolichyl diphosphate synthase	56.119	-1.5	-1.4	7	1.8
TMCO1	mRNA	54499	NM_019026	chr1	-	165696778	F	AATAAA	53.8	7	0.1	4.9	transmembrane and coiled-coil domains 1	9.727	5.1	9.7	4	12.1
C1orf144	mRNA	26099	NM_001114600	chr1	+	16722865	M	AATAAA	18.5	-9.8	-0.6	4.9	chromosome 1 open reading frame 144	40.406	-1.3	-0.7	5	9.2
RAP1A	mRNA	5906	NM_001010935	chr1	+	112255736	M	ATTAAA	68.6	-7.7	-0.2	4.9	RAP1A, member of RAS oncogene family	26.189	-1.7	-1.2	5	2
RRP15	mRNA	51018	NM_016052	chr1	+	218504793	M	ATTAAA	75.6	-23.5	-1.5	4.9	ribosomal RNA processing 15 homolog (S. cerevisiae)	30.678	1.1	0.1	4	7.1
G3BP1	mRNA	10146	NM_005754	chr5	+	151184915	M	ATTAAA	11.6	-0.1	0	4.9	GTPase activating protein (SH3 domain) binding protein 1	282.84	-2.2	-19	4	19
NARG2	mRNA	79664	NM_024611	chr15	-	60715200	F	AATAAA	20	-20	-0.6	4.9	NMDA receptor regulated 2	14.965	-2.2	-1.4	6	1.4
CREB3L3	mRNA	84699	NM_032607	chr19	+	4173051	F	AATAAA	95.8	-95.8	-4.9	4.9	cAMP responsive element binding protein 3-like 3	17.958	-4.4	-3.5	3	3.5
RALGAPB	mRNA	57148	NM_020336	chr20	+	37204466	M	ATTAAA	83.5	-0.8	-0.1	4.8	Ral GTPase activating protein, beta subunit (non-catalytic)	199.784	-1.5	-4.9	4	4.9
TUBB6	mRNA	84617	NM_032525	chr18	+	12307183	UA	NoPAS	0.4	3	1.9	4.8	tubulin, beta 6 class V	181.826	1.5	6.7	2	68.9
TUBB6	mRNA	84617	NM_032525	chr18	+	12326568	S	AATAAA	99.6	-3	-1.9	4.8	tubulin, beta 6 class V	181.826	1.5	6.7	2	68.9
RNF4	mRNA	6047	NM_001185009	chr4	+	2468600	UA	AATAAA	16.1	-2.4	-0.1	4.8	ring finger protein 4	41.902	-1.2	-0.5	3	9.4
CSTB	mRNA	1476	NM_000100	chr21	-	45192393	M	AATAAA	8.3	1.7	0	4.8	cystatin B (stefin B)	44.895	-1.7	-1.9	5	12.4
BCAP29	mRNA	55973	NM_018844	chr7	+	107260919	F	AATAAA	32.1	4.6	0.3	4.8	B-cell receptor-associated protein 29	102.511	1.1	0.3	3	30.3
RRAS2	mRNA	22800	NM_012250	chr11	-	14299468	L	ATTAAA	29.1	18.9	0.9	4.8	related RAS viral (r-ras) oncogene homolog 2	41.154	-2.4	-3.8	3	5.7
CYB5D2	mRNA	124936	NM_144611	chr17	+	4065696	L	AATAAA	4.6	19.6	4.8	4.8	cytochrome b5 domain containing 2	81.56	1	0.1	3	10.5
SPATS2L	mRNA	26010	NM_001100422	chr2	+	201343253	M	ATTAAA	94.3	2.8	0.2	4.8	spermatogenesis associated, serine-rich 2-like	26.189	1.8	2.2	5	41.7
HNRPLL	mRNA	92906	NM_138394	chr2	-	38790650	M	OtherPAS	3.7	-0.4	0	4.8	heterogeneous nuclear ribonucleoprotein L-like	20.203	1	0	4	6.9
RARS2	mRNA	57038	NM_020320	chr6	-	88224101	F	ATTAAA	25	-8.3	-0.2	4.8	arginyl-tRNA synthetase 2, mitochondrial	14.965	-1.2	-0.2	6	1.6
HLA-E	mRNA	3133	NM_005516	chr6	+	30461084	M	AATAAA	77.8	1.4	0	4.8	major histocompatibility complex, class I, E	33.671	-1	0	3	29.5
RHOA	mRNA	387	NM_001664	chr3	-	49396929	M	AATAAA	8.6	-3	-0.9	4.8	ras homolog gene family, member A	279.847	-1.1	-0.4	3	29.8
ZRANB2	mRNA	9406	NM_005455	chr1	-	71529682	M	ATTAAA	0	0	NA	4.8	zinc finger, RAN-binding domain containing 2	33.671	-2.4	-3.1	8	3.4
CEACAM19	mRNA	56971	NM_020219	chr19	+	45187627	F	AATAAA	NA	NA	NA	4.8	carcinoembryonic antigen-related cell adhesion molecule 19	0	999	0	4	1.7
BRSK1	mRNA	84446	NM_032430	chr19	+	55823961	L	AATAAA	50	-5.6	0	4.8	BR serine/threonine kinase 1	5.986	2	0.9	4	3.5
GMEB2	mRNA	26205	NM_012384	chr20	-	62221178	F	OtherPAS	87.5	-9.2	-0.3	4.7	glucocorticoid modulatory element binding protein 2	23.944	-1.5	-0.9	3	1.3
TCEA2	mRNA	6919	NM_003195	chr20	+	62695476	Is	AATAAA	46	-3	-0.2	4.7	transcription elongation factor A (SII), 2	84.553	-1.3	-1.4	2	159.9
TCEA2	mRNA	6919	NM_003195	chr20	+	62703700	S	ATTAAA	54	3	0.2	4.7	transcription elongation factor A (SII), 2	84.553	-1.3	-1.4	2	159.9
ANXA5	mRNA	308	NM_001154	chr4	-	122621702	UA	ATTAAA	0	0	NA	4.7	annexin A5	44.147	-4.7	-8.2	3	8.7
ITGB1	mRNA	3688	NM_002211	chr10	-	33189320	F	ATTAAA	82	-2.2	-0.2	4.7	integrin, beta 1 (fibronectin receptor, beta polypeptide, antigen CD29 includes MDF2, MSK12)	133.189	-1.9	-6.8	3	86.8
TM9SF3	mRNA	56889	NM_020123	chr10	-	98277867	L	AATAAA	0	3.2	0.3	4.7	transmembrane 9 superfamily member 3	32.923	1.9	3.6	4	3.6
ATG13	mRNA	9776	NM_001205119	chr11	+	46694586	F	AATAAA	5	0.4	0	4.7	ATG13 autophagy related 13 homolog (S. cerevisiae)	89.042	-1.8	-4	2	4
ATG13	mRNA	9776	NM_001205119	chr11	+	46696068	L	AATAAA	95	-0.4	0	4.7	ATG13 autophagy related 13 homolog (S. cerevisiae)	89.042	-1.8	-4	2	4
RBM4B	mRNA	83759	NM_031492	chr11	-	66432469	S	AATAAA	35.3	-17.1	-0.5	4.7	RNA binding motif protein 4B	12.72	1.2	0.1	9	0.2
ENDOV	mRNA	284131	NM_173627	chr17	+	78404143	Ic	OtherPAS	88.1	-5.3	-0.3	4.7	endonuclease V	50.133	1.2	0.5	6	0.9
CTDNEP1	mRNA	23399	NM_015343	chr17	-	7146910	L	OtherPAS	11.4	-6.7	-4.7	4.7	CTD nuclear envelope phosphatase 1	303.043	2.1	35.5	3	35.5
ANKRD9	mRNA	122416	NM_152326	chr14	-	102968104	L	AATAAA	31.8	-15.4	-1.2	4.7	ankyrin repeat domain 9	32.923	1.5	1.5	3	5.2
ACYP1	mRNA	97	NM_203488	chr14	-	75526471	Ic	OtherPAS	80	11.2	0.5	4.7	acylphosphatase 1, erythrocyte (common) type	7.483	3.1	2.9	2	6.9
ACYP1	mRNA	97	NM_203488	chr14	-	75519946	S	AATAAA	20	-11.2	-0.5	4.7	acylphosphatase 1, erythrocyte (common) type	7.483	3.1	2.9	2	6.9
PITPNM2	mRNA	57605	NM_020845	chr12	-	123484850	Is	AATAAA	52.6	38.8	4.7	4.7	phosphatidylinositol transfer protein, membrane-associated 2	28.434	1.4	0.9	3	8.2
KRT79	mRNA	338785	NM_175834	chr12	-	53215231	F	AATAAA	85.8	-3.1	-0.3	4.7	keratin 79	100.266	1.5	3.5	2	65.9
KRT79	mRNA	338785	NM_175834	chr12	-	53215192	L	NoPAS	14.2	3.1	0.3	4.7	keratin 79	100.266	1.5	3.5	2	65.9
HMGA2	mRNA	8091	NM_003483	chr12	+	66359999	M	AATAAA	48.1	22.7	4.7	4.7	high mobility group AT-hook 2	121.217	1.1	0.2	5	99.3
MMAB	mRNA	326625	NM_052845	chr12	-	109994502	F	AATAAA	100	0	0	4.7	methylmalonic aciduria (cobalamin deficiency) cblB type	2.993	1.4	0.1	2	10.9
MMAB	mRNA	326625	NM_052845	chr12	-	109991526	L	AATAAA	0	0	NA	4.7	methylmalonic aciduria (cobalamin deficiency) cblB type	2.993	1.4	0.1	2	10.9
C2orf89	mRNA	129293	NM_001080824	chr2	-	85063043	Is	NoPAS	20	-3.3	0	4.7	chromosome 2 open reading frame 89	3.741	5.4	4.2	3	4.2
PFN2	mRNA	5217	NM_053024	chr3	-	149682717	M	ATTAAA	39.3	-12.8	-1	4.7	profilin 2	45.643	1.2	0.6	3	1.4
TRAPPC3	mRNA	27095	NM_014408	chr1	-	36602641	F	AATAAA	1.8	1	1.5	4.7	trafficking protein particle complex 3	1700.03	-1.2	-6.5	2	128.2
TRAPPC3	mRNA	27095	NM_014408	chr1	-	36602179	L	AATAAA	98.2	-1	-1.5	4.7	trafficking protein particle complex 3	1700.03	-1.2	-6.5	2	128.2
EFHD2	mRNA	79180	NM_024329	chr1	+	15756704	M	OtherPAS	7.2	-4.3	-3.3	4.7	EF-hand domain family, member D2	574.658	-1.4	-10.7	3	228.3
MIER1	mRNA	57708	NM_001146110	chr1	+	67452174	F	AATAAA	16.4	14.3	1.5	4.7	mesoderm induction early response 1 homolog (Xenopus laevis)	54.622	1.2	0.8	4	3
GLUL	mRNA	2752	NM_002065	chr1	-	182353420	F	NoPAS	73.3	12.1	0.6	4.7	glutamate-ammonia ligase	22.448	1.4	0.9	3	19.1
GLUL	mRNA	2752	NM_002065	chr1	-	182352031	L	OtherPAS	26.7	-20.5	-1.7	4.7	glutamate-ammonia ligase	22.448	1.4	0.9	3	19.1
TSPAN3	mRNA	10099	NM_005724	chr15	-	77338326	M	NoPAS	12.1	0.7	0	4.7	tetraspanin 3	68.091	1.1	0.2	5	3.3
ARRDC4	mRNA	91947	NM_183376	chr15	+	98515306	F	AATAAA	95.8	-6.5	-0.2	4.7	arrestin domain containing 4	17.958	1.1	0	3	15.1
ARRDC4	mRNA	91947	NM_183376	chr15	+	98517063	M	AATAAA	4.2	6.5	0.2	4.7	arrestin domain containing 4	17.958	1.1	0	3	15.1
EIF3J	mRNA	8669	NM_003758	chr15	+	44854406	M	AATAAA	77	-14.8	-0.8	4.7	eukaryotic translation initiation factor 3, subunit J	45.643	-1.8	-2.4	6	9.1
CYB5R3	mRNA	1727	NM_001129819	chr22	-	43014908	F	NoPAS	24.8	33	4.7	4.7	cytochrome b5 reductase 3	81.56	-1.9	-4.3	5	4.3
NF2	mRNA	4771	NM_181832	chr22	+	30091053	F	NoPAS	92.3	-9.5	-1.3	4.7	neurofibromin 2 (merlin)	115.979	-2.7	-11.5	3	11.5
PARVB	mRNA	29780	NM_001003828	chr22	+	44565106	M	AATAAA	75.9	-24.9	-4.7	4.7	parvin, beta	80.811	1.7	5.5	3	5.5
LDLR	mRNA	3949	NM_000527	chr19	+	11242839	F	NoPAS	37.9	-8.8	-0.6	4.7	low density lipoprotein receptor	43.399	2.2	6.8	3	28.2
LOC100287314	lncRNA	100287314	NR_040245	chr12	+	30955780	M	OtherPAS	31.2	14.7	0.4	4.7	uncharacterized LOC100287314	11.972	2.1	1.9	10	14.5
LOC100505894	lncRNA	100505894	NR_039993	chr5	+	87583467	Ic	AATAAA	20	1.4	0	4.7	uncharacterized LOC100505894	7.483	2.5	2	5	2
RP11-134G8.8	lncRNA	NA	ENST00000430471	chr1	-	201433633	F	AATAAA	98.8	-1.9	-0.8	4.7		255.903	-2.3	-19.3	2	19.3
RP11-134G8.8	lncRNA	NA	ENST00000430471	chr1	-	201430289	L	AATAAA	1.2	1.9	0.8	4.7		255.903	-2.3	-19.3	2	19.3
EIF2S2	mRNA	8894	NM_003908	chr20	-	32677237	M	ATTAAA	24	-4	-0.2	4.6	eukaryotic translation initiation factor 2, subunit 2 beta, 38kDa	77.818	-1.2	-0.8	3	41.9
IL13RA1	mRNA	3597	NM_001560	chrX	+	117928496	L	AATAAA	89.7	-7.8	-1	4.6	interleukin 13 receptor, alpha 1	123.462	-1.7	-5.1	4	5.1
IMPAD1	mRNA	54928	NM_017813	chr8	-	57875265	M	AATAAA	8.8	5.2	0.2	4.6	inositol monophosphatase domain containing 1	25.441	4	15.4	7	15.4
PCDH7	mRNA	5099	NM_001173523	chr4	+	31148422	S	ATTAAA	0	0	NA	4.6	protocadherin 7	5.238	-1.1	0	5	6.2
GDI2	mRNA	2665	NM_001494	chr10	-	5807818	M	OtherPAS	1.5	3.7	0.5	4.6	GDP dissociation inhibitor 2	50.133	-1.3	-0.8	3	0.8
RSU1	mRNA	6251	NM_012425	chr10	-	16634912	F	AATAAA	81.7	4.5	0.7	4.6	Ras suppressor protein 1	401.064	-3	-44.6	2	44.6
RSU1	mRNA	6251	NM_012425	chr10	-	16634861	L	AATAAA	18.3	-4.5	-0.7	4.6	Ras suppressor protein 1	401.064	-3	-44.6	2	44.6
NDUFV3	mRNA	4731	NM_021075	chr21	+	44329210	F	AATAAA	31	-8.8	-0.3	4.6	NADH dehydrogenase (ubiquinone) flavoprotein 3, 10kDa	31.427	-1	0	5	2.2
DSCR3	mRNA	10311	NM_006052	chr21	-	38597701	F	OtherPAS	95.6	-3.1	-0.5	4.6	Down syndrome critical region gene 3	119.721	1.4	2.6	2	6.5
DSCR3	mRNA	10311	NM_006052	chr21	-	38595723	L	AATAAA	4.4	3.1	0.5	4.6	Down syndrome critical region gene 3	119.721	1.4	2.6	2	6.5
CBLL1	mRNA	79872	NM_024814	chr7	+	107383260	UA	AATAAA	98.2	-7.3	-1.6	4.6	Cas-Br-M (murine) ecotropic retroviral transforming sequence-like 1	83.804	1.1	0.2	3	8.1
NCAPG2	mRNA	54892	NM_017760	chr7	-	158424005	F	AATAAA	1	2.7	0.6	4.6	non-SMC condensin II complex, subunit G2	75.574	1.4	2.4	2	7.4
NCAPG2	mRNA	54892	NM_017760	chr7	-	158418303	L	AATAAA	99	-2.7	-0.6	4.6	non-SMC condensin II complex, subunit G2	75.574	1.4	2.4	2	7.4
LDHA	mRNA	3939	NM_001165414	chr11	+	18431423	L	AATAAA	5.2	3.3	0.2	4.6	lactate dehydrogenase A	57.615	1.4	1.5	6	42.1
TRMT5	mRNA	57570	NM_020810	chr14	-	61441729	F	AATAAA	83.3	11.1	0.4	4.6	TRM5 tRNA methyltransferase 5 homolog (S. cerevisiae)	17.958	-1.5	-0.7	3	3.1
ATP2A2	mRNA	488	NM_170665	chr12	+	110785118	F	AATAAA	88	3	0.5	4.6	ATPase, Ca++ transporting, cardiac muscle, slow twitch 2	142.916	1.6	7.5	3	7.5
FBRSL1	mRNA	57666	NM_001142641	chr12	+	133088538	Is	AATAAA	9.1	3.4	0	4.6	fibrosin-like 1	16.462	-3	-2.3	4	2.3
TMEM87B	mRNA	84910	NM_032824	chr2	+	112873938	F	ATTAAA	27.8	-27.8	-4.6	4.6	transmembrane protein 87B	13.469	5.8	16.1	4	16.1
PEX6	mRNA	5190	NM_000287	chr6	-	42944554	Ic	ATTAAA	71.4	-71.4	-1.7	4.6	peroxisomal biogenesis factor 6	5.238	-1.1	0	4	1.2
DCBLD2	mRNA	131566	NM_080927	chr3	-	98514811	L	OtherPAS	4.3	0.1	0	4.6	discoidin, CUB and LCCL domain containing 2	621.05	-1.6	-16	5	100.3
EIF2A	mRNA	83939	NM_032025	chr3	+	150302029	L	OtherPAS	0	0	NA	4.6	eukaryotic translation initiation factor 2A, 65kDa	7.483	-1.6	-0.3	4	13.2
ZDHHC3	mRNA	51304	NM_016598	chr3	-	44966661	M	AATAAA	91.3	-17.4	-0.6	4.6	zinc finger, DHHC-type containing 3	17.21	-1.1	-0.1	6	15.4
RCC1	mRNA	1104	NM_001048199	chr1	+	28873056	L	AATAAA	0	1.9	0	4.6	regulator of chromosome condensation 1	26.937	1.4	0.8	10	20.2
ZMYM6	mRNA	9204	NM_007167	chr1	-	35483062	Ic	OtherPAS	27.8	38.9	0.6	4.6	zinc finger, MYM-type 6	13.469	-6.6	-3.2	6	3.2
C1orf144	mRNA	26099	NM_001114600	chr1	+	16724640	L	OtherPAS	31.5	3.3	0.1	4.6	chromosome 1 open reading frame 144	40.406	-1.3	-0.7	5	9.2
HMGCR	mRNA	3156	NM_000859	chr5	+	74657554	M	AATAAA	5.2	-3.6	-1.2	4.6	3-hydroxy-3-methylglutaryl-CoA reductase	173.595	-1.3	-2.5	5	5.6
TFIP11	mRNA	24144	NM_001008697	chr22	-	26887893	S	AATAAA	84.7	-6.7	-0.4	4.6	tuftelin interacting protein 11	44.147	-1.6	-1.7	4	15.3
IL4I1	mRNA	259307	NM_172374	chr19	-	50392911	S	ATTAAA	73.1	-31.4	-1.9	4.6	interleukin 4 induced 1	38.909	-2.4	-3.5	2	3.8
OSBPL2	mRNA	9885	NM_144498	chr20	+	60869116	F	NoPAS	11.3	-5.3	-1.5	4.5	oxysterol binding protein-like 2	231.958	-1.5	-5	3	33
STARD8	mRNA	9754	NM_001142503	chrX	+	67891871	Ic	ATTAAA	26.1	15.4	0.9	4.5	StAR-related lipid transfer (START) domain containing 8	34.42	1	0	3	7
STARD8	mRNA	9754	NM_001142503	chrX	+	67945678	S	AATAAA	67.4	-8.9	-0.4	4.5	StAR-related lipid transfer (START) domain containing 8	34.42	1	0	3	7
ZMYM3	mRNA	9203	NM_001171162	chrX	-	70459474	S	AATAAA	100	-42.9	0	4.5	zinc finger, MYM-type 3	0.748	6.3	1.1	3	1.1
ASAH1	mRNA	427	NM_177924	chr8	-	17913935	L	NoPAS	9.5	3.8	0.2	4.5	N-acylsphingosine amidohydrolase (acid ceramidase) 1	55.371	-1.4	-1.1	4	1.4
C16orf72	mRNA	29035	NM_014117	chr16	+	9211389	M	OtherPAS	78.4	-0.9	0	4.5	chromosome 16 open reading frame 72	55.371	-1.2	-0.4	9	1.7
MKLN1	mRNA	4289	NM_001145354	chr7	+	130808178	Ic	AATAAA	1	1.7	0.4	4.5	muskelin 1, intracellular mediator containing kelch motifs	75.574	1.6	4.2	5	4.2
C17orf101	mRNA	79701	NM_175902	chr17	-	80350100	F	OtherPAS	26.2	-4	-0.1	4.5	chromosome 17 open reading frame 101	31.427	-1	0	6	0.2
SBNO1	mRNA	55206	NM_001167856	chr12	-	123779074	M	AATAAA	20.7	-9.6	-0.5	4.5	strawberry notch homolog 1 (Drosophila)	21.699	1.4	0.8	5	0.8
STX2	mRNA	2054	NM_194356	chr12	-	131286239	Ic	ATTAAA	5.7	-5.7	-0.3	4.5	syntaxin 2	26.189	-1.3	-0.4	7	0.4
GTF2H3	mRNA	2967	NM_001516	chr12	+	124147012	M	AATAAA	47.5	-44.3	-4.5	4.5	general transcription factor IIH, polypeptide 3, 34kDa	29.93	-1.4	-0.8	7	7.3
FAM176A	mRNA	84141	NM_001135032	chr2	-	75719444	L	AATAAA	61.5	26	2.2	4.5	family with sequence similarity 176, member A	29.182	1.1	0.2	4	0.8
SNRNP27	mRNA	11017	NM_006857	chr2	+	70131803	M	AATAAA	8.8	11.2	0.6	4.5	small nuclear ribonucleoprotein 27kDa (U4/U6.U5)	25.441	-1.5	-0.9	3	1.4
PBRM1	mRNA	55193	NM_018313	chr3	-	52718830	Ic	AATAAA	60	-17.9	-0.2	4.5	polybromo 1	3.741	6.9	6.1	8	6.1
PDHB	mRNA	5162	NM_000925	chr3	-	58413357	L	AATAAA	1.1	-0.3	-0.2	4.5	pyruvate dehydrogenase (lipoamide) beta	201.28	1.2	2.1	3	6.9
PDE4DIP	mRNA	9659	NM_014644	chr1	-	144902698	Ic	AATAAA	66.2	-7.4	-0.5	4.5	phosphodiesterase 4D interacting protein	55.371	1.2	0.6	5	12.8
HEATR1	mRNA	55127	NM_018072	chr1	-	236712305	L	OtherPAS	7.3	-0.4	0	4.5	HEAT repeat containing 1	92.783	-2.4	-7.6	4	7.6
RAB3B	mRNA	5865	NM_002867	chr1	-	52373628	L	ATTAAA	45.5	36.3	1.6	4.5	RAB3B, member RAS oncogene family	16.462	-1.1	-0.1	4	12.6
MCTP2	mRNA	55784	NM_018349	chr15	+	95025426	M	ATTAAA	37.5	42.5	0.8	4.5	multiple C2 domains, transmembrane 2	11.972	-3.5	-1.8	6	56.5
MAPK6	mRNA	5597	NM_002748	chr15	+	52358341	F	AATAAA	24.4	37.5	4.5	4.5	mitogen-activated protein kinase 6	30.678	2.8	8.9	3	8.9
NF2	mRNA	4771	NM_181832	chr22	+	30094587	L	AATAAA	7.7	3.2	0.4	4.5	neurofibromin 2 (merlin)	115.979	-2.7	-11.5	3	11.5
POLR2F	mRNA	5435	NM_021974	chr22	+	38363808	F	AATAAA	88.1	-26.3	-4.5	4.5	polymerase (RNA) II (DNA directed) polypeptide F	75.574	-1.3	-0.9	2	12.4
POLR2F	mRNA	5435	NM_021974	chr22	+	38365319	L	AATAAA	11.9	26.3	4.5	4.5	polymerase (RNA) II (DNA directed) polypeptide F	75.574	-1.3	-0.9	2	12.4
LMAN1	mRNA	3998	NM_005570	chr18	-	56995055	L	AATAAA	60	-11	-0.4	4.4	lectin, mannose-binding, 1	22.448	1.5	0.9	3	75.3
TYMS	mRNA	7298	NM_001071	chr18	+	673501	F	AATAAA	96.8	-8.3	-4.4	4.4	thymidylate synthetase	189.308	2.2	26.5	2	139
TYMS	mRNA	7298	NM_001071	chr18	+	673578	L	ATTAAA	3.2	8.3	4.4	4.4	thymidylate synthetase	189.308	2.2	26.5	2	139
NOV	mRNA	4856	NM_002514	chr8	+	120429346	Ic	AATAAA	29.2	-1.9	-0.1	4.4	nephroblastoma overexpressed gene	89.79	-1	0	3	51.7
GRSF1	mRNA	2926	NM_002092	chr4	-	71686347	M	OtherPAS	87.5	-43.9	-4.4	4.4	G-rich RNA sequence binding factor 1	29.93	-1.1	-0.2	7	0.9
ATAD1	mRNA	84896	NM_032810	chr10	-	89514419	F	OtherPAS	81	-47.7	-4.4	4.4	ATPase family, AAA domain containing 1	31.427	-1.4	-0.8	5	6.9
DDX31	mRNA	64794	NM_022779	chr9	-	135468851	M	ATTAAA	38.2	37.9	4.4	4.4	DEAD (Asp-Glu-Ala-Asp) box polypeptide 31	41.154	1.1	0.2	5	1.2
ARPC5L	mRNA	81873	NM_030978	chr9	+	127639694	F	AATAAA	79.3	16.4	1.8	4.4	actin related protein 2/3 complex, subunit 5-like	21.699	2.2	3.6	2	32.4
ARPC5L	mRNA	81873	NM_030978	chr9	+	127640012	L	AATAAA	20.7	-16.4	-1.8	4.4	actin related protein 2/3 complex, subunit 5-like	21.699	2.2	3.6	2	32.4
PSPH	mRNA	5723	NM_004577	chr7	-	56078056	M	ATTAAA	0	0	NA	4.4	phosphoserine phosphatase	20.951	-1.2	-0.2	6	1.9
NAMPT	mRNA	10135	NM_005746	chr7	-	105890489	M	ATTAAA	17.4	13.4	0.6	4.4	nicotinamide phosphoribosyltransferase	17.21	2.6	4.2	7	133.1
PFAS	mRNA	5198	NM_012393	chr17	+	8173804	M	AATAAA	75	-56.5	-2.9	4.4	phosphoribosylformylglycinamidine synthase	8.979	2	1.4	6	11.5
WBP2	mRNA	23558	NM_012478	chr17	-	73841824	F	AATAAA	69.1	18.1	1.5	4.4	WW domain binding protein 2	60.609	-1.9	-3.4	2	40.4
WBP2	mRNA	23558	NM_012478	chr17	-	73841780	L	OtherPAS	30.9	-18.1	-1.5	4.4	WW domain binding protein 2	60.609	-1.9	-3.4	2	40.4
MED6	mRNA	10001	NM_005466	chr14	-	71050957	F	AATAAA	100	-12.5	0	4.4	mediator complex subunit 6	3.741	1.4	0.2	4	0.4
TRMT5	mRNA	57570	NM_020810	chr14	-	61438170	L	AATAAA	4.2	1.4	0	4.4	TRM5 tRNA methyltransferase 5 homolog (S. cerevisiae)	17.958	-1.5	-0.7	3	3.1
SCAF11	mRNA	9169	NM_004719	chr12	-	46354238	Is	AATAAA	1.8	3.8	0.4	4.4	SR-related CTD-associated factor 11	41.902	-1.1	-0.3	5	4
ZNF641	mRNA	121274	NM_152320	chr12	-	48733910	F	AATAAA	25	57.1	4.4	4.4	zinc finger protein 641	20.951	-1.1	-0.1	6	0.9
RHOQ	mRNA	23433	NM_012249	chr2	+	46823509	L	AATAAA	40	-22.5	-0.6	4.4	ras homolog gene family, member Q	3.741	7.2	6.6	5	6.6
HNRNPA3	mRNA	220988	NM_194247	chr2	+	178086899	M	OtherPAS	10.4	-7	-0.6	4.4	heterogeneous nuclear ribonucleoprotein A3	35.916	1.1	0.2	10	28.8
PCMT1	mRNA	5110	NM_005389	chr6	+	150132044	F	ATTAAA	17.9	-4.3	-0.3	4.4	protein-L-isoaspartate (D-aspartate) O-methyltransferase	41.902	1.4	1.4	3	1.4
UMPS	mRNA	7372	NM_000373	chr3	+	124463114	F	NoPAS	2.6	-1.2	-2	4.4	uridine monophosphate synthetase	1495.01	-1.1	-1.2	2	196.4
UMPS	mRNA	7372	NM_000373	chr3	+	124463141	L	NoPAS	97.4	1.2	2	4.4	uridine monophosphate synthetase	1495.01	-1.1	-1.2	2	196.4
ITGB5	mRNA	3693	NM_002213	chr3	-	124480795	L	AATAAA	1.1	3.4	0.7	4.4	integrin, beta 5	68.839	-1.2	-0.5	3	1.5
HFM1	mRNA	164045	NM_001017975	chr1	-	91852969	Ic	OtherPAS	14.3	10.7	0.3	4.4	HFM1, ATP-dependent DNA helicase homolog (S. cerevisiae)	20.951	-1.1	-0.1	4	0.6
C1orf183	mRNA	55924	NM_019099	chr1	-	112262246	L	AATAAA	4.8	12	4.4	4.4	family with sequence similarity 212, member B	310.525	-3.5	-41.4	5	41.4
PEX19	mRNA	5824	NM_002857	chr1	-	160245625	L	OtherPAS	53.3	20	3.8	4.4	peroxisomal biogenesis factor 19	113.734	1.1	0.4	5	1.9
SH3GLB1	mRNA	51100	NM_001206651	chr1	+	87209001	F	AATAAA	21.7	-7.1	-0.4	4.4	SH3-domain GRB2-like endophilin B1	34.42	-1.2	-0.5	5	1.1
UBAP2L	mRNA	9898	NM_014847	chr1	+	154243329	S	OtherPAS	89.5	-59.2	-4.4	4.4	ubiquitin associated protein 2-like	14.217	1.6	0.9	3	13
ASH1L	mRNA	55870	NM_018489	chr1	-	155305059	L	ATTAAA	23.1	-23.1	-0.3	4.4	ash1 (absent, small, or homeotic)-like (Drosophila)	9.727	-2.1	-0.9	3	0.9
RER1	mRNA	11079	NM_007033	chr1	+	2335190	M	OtherPAS	92.4	-8	-4.4	4.4	RER1 retention in endoplasmic reticulum 1 homolog (S. cerevisiae)	435.483	-1.3	-4.9	4	5.7
ARF1	mRNA	375	NM_001024227	chr1	+	228286826	F	OtherPAS	4.1	1.6	0.5	4.4	ADP-ribosylation factor 1	258.147	1.2	2	2	4
ARF1	mRNA	375	NM_001024227	chr1	+	228286910	L	AATAAA	95.9	-1.6	-0.5	4.4	ADP-ribosylation factor 1	258.147	1.2	2	2	4
SLC2A1	mRNA	6513	NM_006516	chr1	-	43417282	Is	AATAAA	13.2	26.8	4.4	4.4	solute carrier family 2 (facilitated glucose transporter), member 1	50.881	2.6	12.1	7	85.5
ANXA6	mRNA	309	NM_001155	chr5	-	150480666	F	Arich	50.6	-27	-4.4	4.4	annexin A6	59.112	2	7.2	2	7.2
ANXA6	mRNA	309	NM_001155	chr5	-	150479071	L	OtherPAS	49.4	27	4.4	4.4	annexin A6	59.112	2	7.2	2	7.2
CYB5R3	mRNA	1727	NM_001129819	chr22	-	43014880	M	NoPAS	11	1.5	0.1	4.4	cytochrome b5 reductase 3	81.56	-1.9	-4.3	5	4.3
SLC27A1	mRNA	376497	NM_198580	chr19	+	17621072	L	NoPAS	NA	NA	NA	4.4	solute carrier family 27 (fatty acid transporter), member 1	0	999	2.1	5	9.1
CCDC97	mRNA	90324	NM_052848	chr19	+	41813153	UA	OtherPAS	20	7.3	0	4.4	coiled-coil domain containing 97	7.483	-1	0	7	2.4
VMA21	mRNA	203547	NM_001017980	chrX	+	150573633	F	AATAAA	65.1	-26.8	-4.3	4.3	VMA21 vacuolar H+-ATPase homolog (S. cerevisiae)	79.315	1.1	0.3	2	20.7
VMA21	mRNA	203547	NM_001017980	chrX	+	150577836	L	ATTAAA	34.9	26.8	4.3	4.3	VMA21 vacuolar H+-ATPase homolog (S. cerevisiae)	79.315	1.1	0.3	2	20.7
SIGLEC15	mRNA	284266	NM_213602	chr18	+	43427910	L	AATAAA	0	0	NA	4.3	sialic acid binding Ig-like lectin 15	1.497	3.2	0.7	5	2.8
VDAC3	mRNA	7419	NM_001135694	chr8	+	42263354	M	OtherPAS	25	-25	-1.4	4.3	voltage-dependent anion channel 3	11.972	-1	0	4	52.8
RNF4	mRNA	6047	NM_001185009	chr4	+	2517579	L	AATAAA	83.9	-3.5	-0.1	4.3	ring finger protein 4	41.902	-1.2	-0.5	3	9.4
HSBP1	mRNA	3281	NM_001537	chr16	+	83845271	F	ATTAAA	74.1	-12.1	-4.3	4.3	heat shock factor binding protein 1	387.595	-1.2	-2.8	2	21.6
HSBP1	mRNA	3281	NM_001537	chr16	+	83846598	L	AATAAA	25.9	12.1	4.3	4.3	heat shock factor binding protein 1	387.595	-1.2	-2.8	2	21.6
KCNMA1	mRNA	3778	NM_001014797	chr10	-	79393868	Is	AATAAA	0	23.5	1.3	4.3	potassium large conductance calcium-activated channel, subfamily M, alpha member 1	13.469	-1.2	-0.1	6	1.6
RECK	mRNA	8434	NM_021111	chr9	+	36086182	Is	ATTAAA	9.1	33.8	0.6	4.3	reversion-inducing-cysteine-rich protein with kazal motifs	8.231	-1.7	-0.5	6	2.2
C9orf37	mRNA	85026	NM_032937	chr9	-	140504657	L	AATAAA	8	1.1	0	4.3	chromosome 9 open reading frame 37	18.706	-1.3	-0.3	3	3.9
CALU	mRNA	813	NM_001199672	chr7	+	128411528	M	AATAAA	6.9	1	0.1	4.3	calumenin	140.672	-1	-0.1	7	75
RABL5	mRNA	64792	NM_001130821	chr7	-	100954195	L	ATTAAA	0	2.2	0	4.3	RAB, member RAS oncogene family-like 5	14.965	2	2.1	5	3.8
THRA	mRNA	7067	NM_003250	chr17	+	38248880	Ic	AATAAA	7.1	28.6	0.8	4.3	thyroid hormone receptor, alpha	10.476	-1.1	-0.1	5	5.5
HS3ST3A1	mRNA	9955	NM_006042	chr17	-	13399215	F	ATTAAA	49.7	-1.2	-0.1	4.3	heparan sulfate (glucosamine) 3-O-sulfotransferase 3A1	139.923	1.4	3.5	2	8.1
HS3ST3A1	mRNA	9955	NM_006042	chr17	-	13398087	L	AATAAA	50.3	1.2	0.1	4.3	heparan sulfate (glucosamine) 3-O-sulfotransferase 3A1	139.923	1.4	3.5	2	8.1
NEK9	mRNA	91754	NM_033116	chr14	-	75549561	M	ATTAAA	24	-4.6	-0.1	4.3	NIMA (never in mitosis gene a)- related kinase 9	18.706	1.3	0.4	3	4.2
CNOT2	mRNA	4848	NM_001199303	chr12	+	70748773	S	AATAAA	31.2	9.4	0.1	4.3	CCR4-NOT transcription complex, subunit 2	11.972	1.8	1.2	5	17.8
GGCX	mRNA	2677	NM_000821	chr2	-	85771843	L	AATAAA	2.8	-1.2	0	4.3	gamma-glutamyl carboxylase	26.937	1.6	1.6	7	9.4
FOSL2	mRNA	2355	NM_005253	chr2	+	28639318	M	ATTAAA	3.5	-1.5	-0.4	4.3	FOS-like antigen 2	367.392	-3.6	-50.1	4	50.1
ENPP1	mRNA	5167	NM_006208	chr6	+	132211913	F	AATAAA	94.5	-8.5	-4.3	4.3	ectonucleotide pyrophosphatase/phosphodiesterase 1	338.21	-1.5	-7.5	3	999
PGM3	mRNA	5238	NM_001199917	chr6	-	83883988	Ic	ATTAAA	2.1	33	4.3	4.3	phosphoglucomutase 3	35.168	-1.4	-0.9	5	2.1
ZMAT3	mRNA	64393	NM_152240	chr3	-	178737833	F	AATAAA	88.7	-0.9	-0.2	4.3	zinc finger, matrin-type 3	821.582	-4.6	-140.1	2	140.1
ZMAT3	mRNA	64393	NM_152240	chr3	-	178735017	L	AATAAA	11.3	0.9	0.2	4.3	zinc finger, matrin-type 3	821.582	-4.6	-140.1	2	140.1
OXNAD1	mRNA	92106	NM_138381	chr3	+	16347594	M	ATTAAA	70.6	-12.1	-0.5	4.3	oxidoreductase NAD-binding domain containing 1	25.441	1.1	0.1	5	1.3
ABL2	mRNA	27	NM_007314	chr1	-	179068465	L	AATAAA	3.6	11.6	4.3	4.3	v-abl Abelson murine leukemia viral oncogene homolog 2	147.406	1	0.1	3	15.2
SDCCAG8	mRNA	10806	NM_006642	chr1	+	243419901	Ic	AATAAA	27.3	44.1	0.8	4.3	serologically defined colon cancer antigen 8	8.231	-1.7	-0.5	4	0.6
ASH1L	mRNA	55870	NM_018489	chr1	-	155533735	UA	AATAAA	76.9	-19.8	-0.2	4.3	ash1 (absent, small, or homeotic)-like (Drosophila)	9.727	-2.1	-0.9	3	0.9
ZMYM6	mRNA	9204	NM_007167	chr1	-	35452583	L	ATTAAA	66.7	-33.4	-0.3	4.3	zinc finger, MYM-type 6	13.469	-6.6	-3.2	6	3.2
NIPAL3	mRNA	57185	NM_020448	chr1	+	24799466	M	ATTAAA	74.2	-6.8	-0.3	4.3	NIPA-like domain containing 3	49.385	-1.7	-2.1	4	2.4
EFNA5	mRNA	1946	NM_001962	chr5	-	106712595	F	AATAAA	92	1.8	0.1	4.3	ephrin-A5	37.413	2	4.7	2	13.5
EFNA5	mRNA	1946	NM_001962	chr5	-	106699186	L	AATAAA	8	-1.8	-0.1	4.3	ephrin-A5	37.413	2	4.7	2	13.5
SAR1B	mRNA	51128	NM_001033503	chr5	-	133942119	F	AATAAA	14.8	60.2	4.3	4.3	SAR1 homolog B (S. cerevisiae)	20.203	-1.5	-0.7	3	0.9
FBXO17	mRNA	115290	NM_024907	chr19	-	39434214	Ic	AATAAA	0	20	0.8	4.3	F-box protein 17	11.224	-1.7	-0.6	6	6.5
BRSK1	mRNA	84446	NM_032430	chr19	+	55823864	M	NoPAS	50	-16.7	-0.2	4.3	BR serine/threonine kinase 1	5.986	2	0.9	4	3.5
BRD4	mRNA	23476	NM_058243	chr19	-	15357858	Is	AATAAA	39.3	24.4	3.3	4.3	bromodomain containing 4	66.595	1.3	1	3	1
TXNL4A	mRNA	10907	NM_006701	chr18	-	77733406	L	OtherPAS	12.5	4.1	0.3	4.2	thioredoxin-like 4A	53.874	2.8	15.4	3	15.4
TXNL1	mRNA	9352	NM_004786	chr18	-	54264440	L	ATTAAA	0	0	NA	4.2	thioredoxin-like 1	138.427	-1.6	-4.7	3	13.9
CYHR1	mRNA	50626	NM_138496	chr8	-	145675314	F	ATTAAA	32.2	15.3	1.5	4.2	cysteine/histidine-rich 1	65.098	1.2	0.9	5	2.6
MTDH	mRNA	92140	NM_178812	chr8	+	98737247	F	AATAAA	31.2	-21.1	-4.2	4.2	metadherin	81.56	1.1	0.2	4	1
AIMP1	mRNA	9255	NM_004757	chr4	+	107269649	M	AATAAA	64.3	-3.7	-0.1	4.2	aminoacyl tRNA synthetase complex-interacting multifunctional protein 1	52.378	-2.3	-4.4	3	39.7
GABARAPL2	mRNA	11345	NM_007285	chr16	+	75611450	F	OtherPAS	12.1	0	0	4.2	GABA(A) receptor-associated protein-like 2	24.692	1.6	1.4	3	18.9
TERF2	mRNA	7014	NM_005652	chr16	-	69389470	M	ATTAAA	0	28.6	0.3	4.2	telomeric repeat binding factor 2	2.993	1.6	0.3	8	2.5
SVIL	mRNA	6840	NM_021738	chr10	-	29746362	F	AATAAA	63.6	-6.1	-0.2	4.2	supervillin	41.154	-1.5	-1.3	3	1.3
ZWINT	mRNA	11130	NM_032997	chr10	-	58117818	F	ATTAAA	95.2	-4.7	-4.2	4.2	ZW10 interactor	575.407	1.6	22.9	3	205.2
EXOSC1	mRNA	51013	NM_016046	chr10	-	99195998	F	AATAAA	49	-9.7	-0.3	4.2	exosome component 1	36.664	-1.9	-2.2	2	7.3
EXOSC1	mRNA	51013	NM_016046	chr10	-	99195902	L	OtherPAS	51	9.7	0.3	4.2	exosome component 1	36.664	-1.9	-2.2	2	7.3
CNNM2	mRNA	54805	NM_017649	chr10	+	104687375	Is	AATAAA	8.3	6.9	0.2	4.2	cyclin M2	17.958	1.2	0.4	5	9.7
NCS1	mRNA	23413	NM_014286	chr9	+	132998906	M	AATAAA	11.7	-7.3	-1.1	4.2	neuronal calcium sensor 1	134.686	-2.2	-9.7	7	50.9
GPSM1	mRNA	26086	NM_001145638	chr9	+	139236290	Ic	ATTAAA	13.6	-5.9	-0.3	4.2	G-protein signaling modulator 1	32.923	-1.2	-0.5	5	15.4
TNC	mRNA	3371	NM_002160	chr9	-	117781854	L	AATAAA	0	7.7	1.2	4.2	tenascin C	44.147	-1	0	5	10.8
CALU	mRNA	813	NM_001199672	chr7	+	128410183	M	ATTAAA	25.5	-7.8	-1.2	4.2	calumenin	140.672	-1	-0.1	7	75
ZNF655	mRNA	79027	NM_001083956	chr7	+	99162149	Ic	NoPAS	15.5	-13	-4.2	4.2	zinc finger protein 655	72.581	1.9	6.8	4	6.8
PSPH	mRNA	5723	NM_004577	chr7	-	56078757	M	AATAAA	85.7	-39.5	-2.5	4.2	phosphoserine phosphatase	20.951	-1.2	-0.2	6	1.9
EHD1	mRNA	10938	NM_006795	chr11	-	64620208	L	ATTAAA	76.2	-26.2	-4.2	4.2	EH-domain containing 1	94.28	-1.5	-2.2	3	27
FADD	mRNA	8772	NM_003824	chr11	+	70053482	M	ATTAAA	90.2	5.1	0.3	4.2	Fas (TNFRSF6)-associated via death domain	38.161	-1.3	-0.7	3	4
MTRNR2L1	mRNA	100462977	NM_001190452	chr17	+	22020932	UA	NoPAS	54.8	-40.7	-4.2	4.2	MT-RNR2-like 1	23.196	1.9	2.4	9	2.4
SEC14L1	mRNA	6397	NM_001204410	chr17	+	75210414	S	ATTAAA	28.8	-14.1	-1.5	4.2	SEC14-like 1 (S. cerevisiae)	44.147	2.5	9.6	4	9.6
TBCD	mRNA	6904	NM_005993	chr17	+	80706419	UA	AATAAA	0	16.7	0.6	4.2	tubulin folding cofactor D	11.224	1.1	0.1	3	16.3
MLEC	mRNA	9761	NM_014730	chr12	+	121135079	M	Arich	35.7	14.3	0.4	4.2	malectin	10.476	10.1	27.9	4	27.9
COL6A3	mRNA	1293	NM_004369	chr2	-	238232772	M	OtherPAS	2.6	0.8	0	4.2	collagen, type VI, alpha 3	58.364	1	0.1	4	999
MTHFD2	mRNA	10797	NM_006636	chr2	+	74442392	M	AATAAA	11.8	-11.8	-0.7	4.2	methylenetetrahydrofolate dehydrogenase (NADP+ dependent) 2, methenyltetrahydrofolate cyclohydrolase	12.72	1	0	7	0.4
DNPEP	mRNA	23549	NM_012100	chr2	-	220236765	L	OtherPAS	12	-5.3	0	4.2	aspartyl aminopeptidase	18.706	-1.8	-1.2	4	1.2
PRPF40A	mRNA	55660	NM_017892	chr2	-	153511843	L	ATTAAA	6.8	-1.3	-0.1	4.2	PRP40 pre-mRNA processing factor 40 homolog A (S. cerevisiae)	253.658	-1.9	-12.3	3	12.3
BCLAF1	mRNA	9774	NM_014739	chr6	-	136579432	M	AATAAA	8.2	-4.4	-0.6	4.2	BCL2-associated transcription factor 1	72.581	-1	-0.1	4	14
MAP3K4	mRNA	4216	NM_005922	chr6	+	161538412	F	AATAAA	100	-83.3	-4.2	4.2	mitogen-activated protein kinase kinase kinase 4	8.979	-1.1	-0.1	3	1.6
PDHB	mRNA	5162	NM_000925	chr3	-	58413762	F	AATAAA	95.9	0.8	0.2	4.2	pyruvate dehydrogenase (lipoamide) beta	201.28	1.2	2.1	3	6.9
ZNF672	mRNA	79894	NM_024836	chr1	+	249143714	L	AATAAA	91.7	-11.1	-0.4	4.2	zinc finger protein 672	17.958	1.2	0.2	4	6.8
ZMYM6NB	mRNA	100506144	NM_001195156	chr1	-	35447177	F	AATAAA	88.6	5.2	0	4.2	ZMYM6 neighbor	26.189	-2.4	-2.5	2	4
ZMYM6NB	mRNA	100506144	NM_001195156	chr1	-	35447134	L	OtherPAS	11.4	-5.2	0	4.2	ZMYM6 neighbor	26.189	-2.4	-2.5	2	4
KIAA0141	mRNA	9812	NM_014773	chr5	+	141321612	L	AATAAA	0	23.5	1.1	4.2	KIAA0141	10.476	2.2	1.9	6	1.9
C5orf24	mRNA	134553	NM_001135586	chr5	+	134195425	L	AATAAA	0	0	NA	4.2	chromosome 5 open reading frame 24	6.734	-2.5	-0.8	4	1.6
SRP14	mRNA	6727	NM_003134	chr15	-	40328242	F	ATTAAA	0	0	NA	4.2	signal recognition particle 14kDa (homologous Alu RNA binding protein)	255.903	1.9	24.2	2	31.6
SRP14	mRNA	6727	NM_003134	chr15	-	40327941	L	AATAAA	100	0	0	4.2	signal recognition particle 14kDa (homologous Alu RNA binding protein)	255.903	1.9	24.2	2	31.6
MAST1	mRNA	22983	NM_014975	chr19	+	12969138	Ic	ATTAAA	0	0	NA	4.2	microtubule associated serine/threonine kinase 1	8.979	2.9	3.2	3	16.9
MCTS1	mRNA	28985	NM_014060	chrX	+	119755014	L	AATAAA	0	0	NA	4.1	malignant T cell amplified sequence 1	19.455	-1.6	-0.9	3	10.5
PHF8	mRNA	23133	NM_015107	chrX	-	53963113	M	OtherPAS	100	-64	-4.1	4.1	PHD finger protein 8	10.476	1.6	0.7	5	0.7
SMAD2	mRNA	4087	NM_001003652	chr18	-	45367973	M	ATTAAA	18.8	-15.2	-1.7	4.1	SMAD family member 2	35.916	1.1	0.1	6	20.9
EIF3E	mRNA	3646	NM_001568	chr8	-	109245621	Is	AATAAA	55.6	-36.8	-4.1	4.1	eukaryotic translation initiation factor 3, subunit E	47.14	-1.5	-1.2	3	1.2
AIMP1	mRNA	9255	NM_004757	chr4	+	107270382	L	AATAAA	28.6	-1.3	0	4.1	aminoacyl tRNA synthetase complex-interacting multifunctional protein 1	52.378	-2.3	-4.4	3	39.7
LIAS	mRNA	11019	NM_006859	chr4	+	39465434	Ic	AATAAA	100	NA	NA	4.1	lipoic acid synthetase	2.993	-999	-1.3	2	1.3
LIAS	mRNA	11019	NM_006859	chr4	+	39479273	S	ATTAAA	0	NA	NA	4.1	lipoic acid synthetase	2.993	-999	-1.3	2	1.3
SCARB2	mRNA	950	NM_005506	chr4	-	77079890	L	AATAAA	5.4	3.5	0.1	4.1	scavenger receptor class B, member 2	41.902	-1.1	-0.2	5	25
CORO7-PAM16	mRNA	100529144	NM_001201479	chr16	-	4374654	L	AATAAA	14.3	-14.3	-0.6	4.1	CORO7-PAM16 readthrough	15.713	-1.5	-0.6	4	1.4
RNF40	mRNA	9810	NM_014771	chr16	+	30786539	M	NoPAS	64.9	16.6	4.1	4.1	ring finger protein 40	127.951	1.6	5.8	4	8.7
COX4NB	mRNA	10328	NM_006067	chr16	-	85804697	L	AATAAA	2.2	14.5	1.5	4.1	COX4 neighbor	33.671	-1	0	7	19.1
CYB5B	mRNA	80777	NM_030579	chr16	+	69498919	L	AATAAA	7.2	-3.4	-0.5	4.1	cytochrome b5 type B (outer mitochondrial membrane)	113.734	-1.3	-1.4	4	155.1
CHCHD1	mRNA	118487	NM_203298	chr10	+	75540386	UA	AATAAA	0	1.6	0	4.1	coiled-coil-helix-coiled-coil-helix domain containing 1	41.902	0	0	3	39.2
REEP3	mRNA	221035	NM_001001330	chr10	+	65381104	E	AATAAA	42.6	-18	-4.1	4.1	receptor accessory protein 3	187.812	-1.4	-3.7	3	3.7
GPSM1	mRNA	26086	NM_001145638	chr9	+	139254052	F	AATAAA	56.8	15	0.8	4.1	G-protein signaling modulator 1	32.923	-1.2	-0.5	5	15.4
ARPC1A	mRNA	10552	NM_006409	chr7	+	98963885	M	AATAAA	98.4	-7.3	-2.7	4.1	actin related protein 2/3 complex, subunit 1A, 41kDa	95.028	5.2	90.5	3	90.5
C7orf44	mRNA	55744	NM_018224	chr7	-	43677591	L	NoPAS	0	84.2	4.1	4.1	chromosome 7 open reading frame 44	5.986	2.1	1.1	5	1.8
RPA3	mRNA	6119	NM_002947	chr7	-	7676575	F	ATTAAA	4.8	-1.7	-0.5	4.1	replication protein A3, 14kDa	187.063	1.5	6.5	3	24.9
COPB1	mRNA	1315	NM_016451	chr11	-	14479096	F	AATAAA	80.4	-8.5	-0.4	4.1	coatomer protein complex, subunit beta 1	41.902	-1.1	-0.2	3	2.6
COPB1	mRNA	1315	NM_016451	chr11	-	14479058	L	AATAAA	12.5	15.6	1.2	4.1	coatomer protein complex, subunit beta 1	41.902	-1.1	-0.2	3	2.6
RPL27A	mRNA	6157	NM_000990	chr11	+	8711192	L	AATAAA	6.1	4.5	1.9	4.1	ribosomal protein L27a	378.616	-1.1	-0.8	3	45.2
GOSR2	mRNA	9570	NM_004287	chr17	+	45012674	Ic	NoPAS	2.2	1.6	0.3	4.1	golgi SNAP receptor complex member 2	135.434	-1.3	-1.5	7	20.5
C17orf85	mRNA	55421	NM_018553	chr17	-	3715002	M	AATAAA	5	66.4	4.1	4.1	chromosome 17 open reading frame 85	14.965	-1.6	-0.6	6	1.2
FZD2	mRNA	2535	NM_001466	chr17	+	42636857	F	AATAAA	97.3	0.6	0.2	4.1	frizzled family receptor 2	197.539	2.1	26.4	2	26.4
FZD2	mRNA	2535	NM_001466	chr17	+	42638625	L	AATAAA	2.7	-0.6	-0.2	4.1	frizzled family receptor 2	197.539	2.1	26.4	2	26.4
NEK9	mRNA	91754	NM_033116	chr14	-	75548824	L	AATAAA	24	1	0	4.1	NIMA (never in mitosis gene a)- related kinase 9	18.706	1.3	0.4	3	4.2
FAM176A	mRNA	84141	NM_001135032	chr2	-	75719612	M	AATAAA	17.9	-9.6	-0.7	4.1	family with sequence similarity 176, member A	29.182	1.1	0.2	4	0.8
KYNU	mRNA	8942	NM_001199241	chr2	+	143756970	Is	AATAAA	0	30	4	4.1	kynureninase	46.392	-3.4	-6.5	8	27.7
CYP1B1	mRNA	1545	NM_000104	chr2	-	38295247	F	AATAAA	67.5	-10.7	-1.9	4.1	cytochrome P450, family 1, subfamily B, polypeptide 1	363.651	-3.1	-41.1	3	128.3
FAM162A	mRNA	26355	NM_014367	chr3	+	122131181	M	AATAAA	14.6	-13.5	-2.5	4.1	family with sequence similarity 162, member A	30.678	2	4.1	6	30.4
RHOA	mRNA	387	NM_001664	chr3	-	49396578	L	AATAAA	74.9	11.3	4.1	4.1	ras homolog gene family, member A	279.847	-1.1	-0.4	3	29.8
ELK4	mRNA	2005	NM_001973	chr1	-	205600037	Ic	AATAAA	30	45	1.1	4.1	ELK4, ETS-domain protein (SRF accessory protein 1)	7.483	1.1	0	4	1.1
SARS	mRNA	6301	NM_006513	chr1	+	109780742	F	AATAAA	99.3	-0.3	0	4.1	seryl-tRNA synthetase	211.756	-1.6	-6.7	2	6.7
SARS	mRNA	6301	NM_006513	chr1	+	109780780	L	NoPAS	0.7	0.3	0	4.1	seryl-tRNA synthetase	211.756	-1.6	-6.7	2	6.7
DPH2	mRNA	1802	NM_001384	chr1	+	44439041	L	AATAAA	98.4	-9.5	-4.1	4.1	DPH2 homolog (S. cerevisiae)	279.847	-4.2	-44.4	3	44.4
HEATR1	mRNA	55127	NM_018072	chr1	-	236713964	F	OtherPAS	58.9	-12.3	-0.8	4.1	HEAT repeat containing 1	92.783	-2.4	-7.6	4	7.6
STK40	mRNA	83931	NM_032017	chr1	-	36806787	M	OtherPAS	3.8	37.9	4.1	4.1	serine/threonine kinase 40	39.657	-2.4	-3.7	6	4.9
ENAH	mRNA	55740	NM_001008493	chr1	-	225674531	L	AATAAA	40	34.6	3	4.1	enabled homolog (Drosophila)	26.189	1.5	1.3	8	1.3
LIFR	mRNA	3977	NM_001127671	chr5	-	38479901	M	OtherPAS	59.3	-19.3	-0.7	4.1	leukemia inhibitory factor receptor alpha	20.203	1.2	0.2	5	0.4
OSMR	mRNA	9180	NM_003999	chr5	+	38935743	M	AATAAA	69.4	-55.1	-4.1	4.1	oncostatin M receptor	26.937	-1.9	-1.6	6	14
NIM1	mRNA	167359	NM_153361	chr5	+	43245260	E	AATAAA	50	-50	-4.1	4.1	serine/threonine-protein kinase NIM1	5.986	6.8	9.3	2	9.3
NIM1	mRNA	167359	NM_153361	chr5	+	43280952	S	AATAAA	50	50	4.1	4.1	serine/threonine-protein kinase NIM1	5.986	6.8	9.3	2	9.3
MESDC2	mRNA	23184	NM_015154	chr15	-	81271305	F	OtherPAS	0	1.3	0.3	4.1	mesoderm development candidate 2	63.602	1.7	4.1	6	8.7
ILF3	mRNA	3609	NM_017620	chr19	+	10803074	L	AATAAA	81.5	4.2	0.3	4.1	interleukin enhancer binding factor 3, 90kDa	68.839	1.2	0.6	3	55.1
GLT25D1	mRNA	79709	NM_024656	chr19	+	17692671	F	OtherPAS	2.5	4.6	0.9	4.1	glycosyltransferase 25 domain containing 1	117.476	-2.5	-10.2	3	10.2
YIPF2	mRNA	78992	NM_024029	chr19	-	11032861	M	AATAAA	54.7	-0.7	0	4.1	Yip1 domain family, member 2	79.315	1.1	0.2	4	17.3
RP11-18C24.6	lncRNA	NA	ENST00000500741	chr12	-	120925329	F	AATAAA	8.5	0.6	0	4.1		44.147	2.5	9.8	2	9.8
RALY	mRNA	22913	NM_016732	chr20	+	32602763	Ic	AATAAA	25.2	-19.5	-4	4	RNA binding protein, autoantigenic (hnRNP-associated with lethal yellow homolog (mouse))	80.063	-1.1	-0.4	2	19
RALY	mRNA	22913	NM_016732	chr20	+	32668067	S	AATAAA	74.8	19.5	4	4	RNA binding protein, autoantigenic (hnRNP-associated with lethal yellow homolog (mouse))	80.063	-1.1	-0.4	2	19
IL13RA1	mRNA	3597	NM_001560	chrX	+	117926324	M	ATTAAA	1.8	4.9	1.3	4	interleukin 13 receptor, alpha 1	123.462	-1.7	-5.1	4	5.1
PRICKLE3	mRNA	4007	NM_006150	chrX	-	49020805	L	AATAAA	28.6	33.9	0.7	4	prickle homolog 3 (Drosophila)	5.238	3.1	2.2	6	2.2
FBXO32	mRNA	114907	NM_058229	chr8	-	124539984	Ic	AATAAA	0.8	24.2	4	4	F-box protein 32	193.049	-17.9	-62.4	8	62.4
MTHFD2L	mRNA	441024	NM_001144978	chr4	+	75025875	Ic	NoPAS	5.3	69.7	4	4	methylenetetrahydrofolate dehydrogenase (NADP+ dependent) 2-like	14.217	-1.8	-0.8	10	2.7
CLCN7	mRNA	1186	NM_001287	chr16	-	1495341	F	AATAAA	87.7	-10.4	-4	4	chloride channel 7	378.616	-1.7	-12.3	2	36.6
CLCN7	mRNA	1186	NM_001287	chr16	-	1494936	L	AATAAA	12.3	10.4	4	4	chloride channel 7	378.616	-1.7	-12.3	2	36.6
LCOR	mRNA	84458	NM_032440	chr10	+	98590389	UA	AATAAA	94.8	-14.6	-4	4	ligand dependent nuclear receptor corepressor	115.979	1	0	2	1.7
LCOR	mRNA	84458	NM_032440	chr10	+	98724193	S	AATAAA	5.2	14.6	4	4	ligand dependent nuclear receptor corepressor	115.979	1	0	2	1.7
ANXA11	mRNA	311	NM_145869	chr10	-	81915353	F	OtherPAS	68.2	2.1	0	4	annexin A11	32.923	-1.3	-0.6	5	26.9
MXI1	mRNA	4601	NM_130439	chr10	+	112044815	F	OtherPAS	0	0	NA	4	MAX interactor 1	7.483	4	4.8	5	26.7
NEK6	mRNA	10783	NM_001145001	chr9	+	127114692	M	AATAAA	19.3	11.7	1.3	4	NIMA (never in mitosis gene a)-related kinase 6	65.846	1.7	4.6	4	4.6
KIAA1324L	mRNA	222223	NM_001142749	chr7	-	86509331	F	ATTAAA	60	0	0	4	KIAA1324-like	3.741	1.8	0.5	6	0.8
ACTB	mRNA	60	NM_001101	chr7	-	5567299	F	Arich	0	0	NA	4	actin, beta	68.091	-2.5	-6.1	3	122.3
ACTB	mRNA	60	NM_001101	chr7	-	5566779	L	AATAAA	100	-7.3	-1.5	4	actin, beta	68.091	-2.5	-6.1	3	122.3
FOSL1	mRNA	8061	NM_005438	chr11	-	65657473	L	AATAAA	0.4	5.5	4	4	FOS-like antigen 1	182.574	1.9	16	5	148.5
ENDOV	mRNA	284131	NM_173627	chr17	+	78410435	M	OtherPAS	1.5	0.8	0	4	endonuclease V	50.133	1.2	0.5	6	0.9
CTDNEP1	mRNA	23399	NM_015343	chr17	-	7147114	M	OtherPAS	88.6	6.2	4	4	CTD nuclear envelope phosphatase 1	303.043	2.1	35.5	3	35.5
PAFAH1B1	mRNA	5048	NM_000430	chr17	+	2585204	F	AATAAA	0	0	NA	4	platelet-activating factor acetylhydrolase 1b, regulatory subunit 1 (45kDa)	8.979	1.4	0.3	5	2.3
ANKRD9	mRNA	122416	NM_152326	chr14	-	102969986	M	AATAAA	6.8	-1.3	0	4	ankyrin repeat domain 9	32.923	1.5	1.5	3	5.2
PCNX	mRNA	22990	NM_014982	chr14	+	71577745	M	AATAAA	44.5	-27.4	-4	4	pecanex homolog (Drosophila)	102.511	-2.2	-7.2	8	14.7
HSP90AA1	mRNA	3320	NM_001017963	chr14	-	102547385	F	OtherPAS	94.9	4	1.2	4	heat shock protein 90kDa alpha (cytosolic), class A member 1	58.364	2.2	8.7	2	999
HSP90AA1	mRNA	3320	NM_001017963	chr14	-	102547079	L	OtherPAS	5.1	-4	-1.2	4	heat shock protein 90kDa alpha (cytosolic), class A member 1	58.364	2.2	8.7	2	999
FBXW8	mRNA	26259	NM_153348	chr12	+	117352762	Ic	AATAAA	0	0	NA	4	F-box and WD repeat domain containing 8	4.49	-2.2	-0.5	7	1.3
GATC	mRNA	283459	NM_176818	chr12	+	120907040	L	AATAAA	0.9	14.5	4	4	glutamyl-tRNA(Gln) amidotransferase, subunit C homolog (bacterial)	86.797	-1.6	-3.2	3	20.2
GLIPR1	mRNA	11010	NM_006851	chr12	+	75897022	L	AATAAA	50	-19.2	-0.4	4	GLI pathogenesis-related 1	5.986	2.9	2.3	5	31.3
PTPN18	mRNA	26469	NM_014369	chr2	+	131132144	F	AATAAA	10.6	1.9	0	4	protein tyrosine phosphatase, non-receptor type 18 (brain-derived)	35.168	-1.6	-1.4	2	2.4
PTPN18	mRNA	26469	NM_014369	chr2	+	131132978	L	AATAAA	89.4	-1.9	0	4	protein tyrosine phosphatase, non-receptor type 18 (brain-derived)	35.168	-1.6	-1.4	2	2.4
PPP1R7	mRNA	5510	NM_002712	chr2	+	242106589	Is	AATAAA	78.9	0.3	0.1	4	protein phosphatase 1, regulatory subunit 7	873.96	-1.4	-13.9	2	52
PPP1R7	mRNA	5510	NM_002712	chr2	+	242122439	S	ATTAAA	21.1	-0.3	-0.1	4	protein phosphatase 1, regulatory subunit 7	873.96	-1.4	-13.9	2	52
WDR92	mRNA	116143	NM_138458	chr2	-	68357767	F	ATTAAA	91.7	-82.6	-4	4	WD repeat domain 92	8.979	-1.2	-0.2	5	4.2
TMEM185B	mRNA	79134	NM_024121	chr2	-	120979054	M	OtherPAS	46.9	-17.5	-3.3	4	transmembrane protein 185B	108.497	1.6	5.8	5	5.8
CUTA	mRNA	51596	NM_015921	chr6	-	33384327	F	AATAAA	65.2	17.2	2.8	4	cutA divalent cation tolerance homolog (E. coli)	83.804	1.3	1.4	2	1.4
CUTA	mRNA	51596	NM_015921	chr6	-	33384219	L	NoPAS	34.8	-17.2	-2.8	4	cutA divalent cation tolerance homolog (E. coli)	83.804	1.3	1.4	2	1.4
CCDC90A	mRNA	63933	NM_001031713	chr6	-	13791020	F	AATAAA	90.6	9.4	1.2	4	coiled-coil domain containing 90A	39.657	-1.5	-1.1	3	6.2
CCDC90A	mRNA	63933	NM_001031713	chr6	-	13786789	L	AATAAA	3.8	-3.8	-0.3	4	coiled-coil domain containing 90A	39.657	-1.5	-1.1	3	6.2
CRBN	mRNA	51185	NM_016302	chr3	-	3191395	M	OtherPAS	0	0	NA	4	cereblon	14.217	-2.3	-1.4	9	1.8
FSTL1	mRNA	11167	NM_007085	chr3	-	120113126	M	AATAAA	14.3	41.7	4	4	follistatin-like 1	26.189	1.3	0.6	6	999
CRTAP	mRNA	10491	NM_006371	chr3	+	33184652	F	OtherPAS	5.5	-0.6	-0.1	4	cartilage associated protein	190.805	1	0	5	47.2
CRTAP	mRNA	10491	NM_006371	chr3	+	33184901	M	NoPAS	3.5	2.5	0.6	4	cartilage associated protein	190.805	1	0	5	47.2
MIB2	mRNA	142678	NM_080875	chr1	+	1552703	Is	AATAAA	50	-33.7	-2.8	4	mindbomb homolog 2 (Drosophila)	28.434	1	0	3	8.1
WLS	mRNA	79971	NM_024911	chr1	-	68584718	L	OtherPAS	2.3	1.3	0	4	wntless homolog (Drosophila)	32.923	1.1	0.3	9	2.3
TMCO1	mRNA	54499	NM_019026	chr1	-	165696680	M	AATAAA	38.5	-19.6	-0.8	4	transmembrane and coiled-coil domains 1	9.727	5.1	9.7	4	12.1
OSMR	mRNA	9180	NM_003999	chr5	+	38933984	M	AATAAA	8.3	48.8	4	4	oncostatin M receptor	26.937	-1.9	-1.6	6	14
DAB2	mRNA	1601	NM_001343	chr5	-	39373140	M	AATAAA	80.6	3.5	0.2	4	disabled homolog 2, mitogen-responsive phosphoprotein (Drosophila)	69.588	-1.6	-2.5	3	2.5
PPIB	mRNA	5479	NM_000942	chr15	-	64452302	Ic	NoPAS	27.3	-20.6	-0.6	4	peptidylprolyl isomerase B (cyclophilin B)	8.231	1.2	0.2	6	5
PPIB	mRNA	5479	NM_000942	chr15	-	64448016	L	AATAAA	63.6	-3.6	0	4	peptidylprolyl isomerase B (cyclophilin B)	8.231	1.2	0.2	6	5
KIAA0930	mRNA	23313	NM_015264	chr22	-	45588125	M	ATTAAA	0.6	-0.6	0	4	KIAA0930	117.476	-1.3	-1.3	4	8
MUM1	mRNA	84939	NM_032853	chr19	+	1359922	Is	AATAAA	0	0	NA	4	melanoma associated antigen (mutated) 1	44.895	1.2	0.5	3	2.5
ELAVL1	mRNA	1994	NM_001419	chr19	-	8027157	M	ATTAAA	3.2	10.6	1.3	4	ELAV (embryonic lethal, abnormal vision, Drosophila)-like 1 (Hu antigen R)	47.14	-1.2	-0.5	5	0.5
LOC100506783	lncRNA	100506783	NR_038435	chr2	-	176996715	L	AATAAA	0	7.5	0.6	4	uncharacterized LOC100506783	18.706	1.4	0.8	4	4.8
IL13RA2	mRNA	3598	NM_000640	chrX	-	114239584	Ic	OtherPAS	20	5	0	3.9	interleukin 13 receptor, alpha 2	11.224	2.9	3.7	2	3.7
IL13RA2	mRNA	3598	NM_000640	chrX	-	114238545	S	AATAAA	80	-5	0	3.9	interleukin 13 receptor, alpha 2	11.224	2.9	3.7	2	3.7
LAMP2	mRNA	3920	NM_002294	chrX	-	119570354	Is	AATAAA	3.4	29.9	3.9	3.9	lysosomal-associated membrane protein 2	43.399	-1.5	-1.4	4	5.3
CEP76	mRNA	79959	NM_024899	chr18	-	12698940	Ic	AATAAA	66.7	6	0	3.9	centrosomal protein 76kDa	6.734	1.1	0	7	3.6
RAB2A	mRNA	5862	NM_002865	chr8	+	61536186	L	AATAAA	26.2	20.2	3.9	3.9	RAB2A, member RAS oncogene family	105.504	1.5	4	4	12.1
CLN8	mRNA	2055	NM_018941	chr8	+	1730861	M	AATAAA	0	22.6	0.5	3.9	ceroid-lipofuscinosis, neuronal 8 (epilepsy, progressive with mental retardation)	5.238	4	3.6	7	3.6
DCTD	mRNA	1635	NM_001012732	chr4	-	183795653	M	ATTAAA	0	0	NA	3.9	dCMP deaminase	3.741	2.5	1.1	8	11.1
TMEM33	mRNA	55161	NM_018126	chr4	+	41956478	F	OtherPAS	19.4	3.9	0.2	3.9	transmembrane protein 33	53.874	-1.9	-2.8	2	7.9
TMEM33	mRNA	55161	NM_018126	chr4	+	41962576	L	AATAAA	80.6	-3.9	-0.2	3.9	transmembrane protein 33	53.874	-1.9	-2.8	2	7.9
KAT8	mRNA	84148	NM_182958	chr16	+	31142680	F	AATAAA	15.6	0.3	0	3.9	K(lysine) acetyltransferase 8	57.615	-1.2	-0.7	5	1.5
ARL2BP	mRNA	23568	NM_012106	chr16	+	57287508	M	ATTAAA	0	11.1	0.5	3.9	ADP-ribosylation factor-like 2 binding protein	13.469	2.3	2.5	5	2.5
NDUFAB1	mRNA	4706	NM_005003	chr16	-	23590884	L	OtherPAS	0	13.6	0	3.9	NADH dehydrogenase (ubiquinone) 1, alpha/beta subcomplex, 1, 8kDa	3.741	4	2.5	3	4.8
FAM45A	mRNA	404636	NM_207009	chr10	+	120864498	Ic	AATAAA	42.4	32	2.1	3.9	family with sequence similarity 45, member A	24.692	1.1	0.1	6	0.4
KIAA1217	mRNA	56243	NM_019590	chr10	+	24834201	Ic	AATAAA	45.6	28.8	3.9	3.9	KIAA1217	77.07	-1.5	-2	4	2.3
KIAA1217	mRNA	56243	NM_019590	chr10	+	24836603	M	AATAAA	54.4	-28.8	-3.9	3.9	KIAA1217	77.07	-1.5	-2	4	2.3
BNIP3	mRNA	664	NM_004052	chr10	-	133781188	M	AATAAA	6.9	0.2	0	3.9	BCL2/adenovirus E1B 19kDa interacting protein 3	86.797	2.8	25	3	25
RCAN1	mRNA	1827	NM_004414	chr21	-	35893369	Ic	AATAAA	100	-62.5	-0.4	3.9	regulator of calcineurin 1	1.497	3.6	0.9	4	75.5
WDR5	mRNA	11091	NM_017588	chr9	+	137023422	F	NoPAS	94.8	0.7	0.1	3.9	WD repeat domain 5	362.903	-1.2	-2.4	3	20.4
NEK6	mRNA	10783	NM_001145001	chr9	+	127113737	F	OtherPAS	43.2	3.8	0.2	3.9	NIMA (never in mitosis gene a)-related kinase 6	65.846	1.7	4.6	4	4.6
C9orf37	mRNA	85026	NM_032937	chr9	-	140509784	F	AATAAA	80	6.4	0.2	3.9	chromosome 9 open reading frame 37	18.706	-1.3	-0.3	3	3.9
CALU	mRNA	813	NM_001199672	chr7	+	128399092	Ic	NoPAS	11.7	3.6	0.4	3.9	calumenin	140.672	-1	-0.1	7	75
LAMB1	mRNA	3912	NM_002291	chr7	-	107564244	S	AATAAA	72	22.7	3.9	3.9	laminin, beta 1	37.413	2.1	4.8	5	15.9
ARPC1A	mRNA	10552	NM_006409	chr7	+	98963721	F	OtherPAS	0	7.8	3.9	3.9	actin related protein 2/3 complex, subunit 1A, 41kDa	95.028	5.2	90.5	3	90.5
PHF21A	mRNA	51317	NM_001101802	chr11	-	45954116	M	ATTAAA	36.4	43.6	1.1	3.9	PHD finger protein 21A	8.231	-1.2	-0.2	5	8
TXNDC17	mRNA	84817	NM_032731	chr17	+	6546443	M	AATAAA	23.1	19.8	0.5	3.9	thioredoxin domain containing 17	9.727	1.5	0.5	5	6.7
GGNBP2	mRNA	79893	NM_024835	chr17	+	34945872	F	AATAAA	80	8.9	0	3.9	gametogenetin binding protein 2	3.741	1.6	0.4	3	2.8
PTPRB	mRNA	5787	NM_001109754	chr12	-	70914964	F	OtherPAS	0	0	NA	3.9	protein tyrosine phosphatase, receptor type, B	0.748	-1.1	0	3	1.2
ATF7	mRNA	11016	NM_006856	chr12	-	53936674	Ic	AATAAA	88.9	1.1	0	3.9	activating transcription factor 7	33.671	-2.5	-3.4	2	10.5
ATF7	mRNA	11016	NM_006856	chr12	-	53905843	S	ATTAAA	11.1	-1.1	0	3.9	activating transcription factor 7	33.671	-2.5	-3.4	2	10.5
CDK2AP1	mRNA	8099	NM_004642	chr12	-	123745553	F	AATAAA	17.6	6.3	0.4	3.9	cyclin-dependent kinase 2 associated protein 1	38.161	2	4.5	2	7.9
CDK2AP1	mRNA	8099	NM_004642	chr12	-	123745523	L	ATTAAA	82.4	-6.3	-0.4	3.9	cyclin-dependent kinase 2 associated protein 1	38.161	2	4.5	2	7.9
PRKAG1	mRNA	5571	NM_001206710	chr12	-	49396060	F	ATTAAA	94.1	-22.4	-3.9	3.9	protein kinase, AMP-activated, gamma 1 non-catalytic subunit	50.881	1.6	2.7	2	6.1
PRKAG1	mRNA	5571	NM_001206710	chr12	-	49394092	L	AATAAA	5.9	22.4	3.9	3.9	protein kinase, AMP-activated, gamma 1 non-catalytic subunit	50.881	1.6	2.7	2	6.1
CHPF	mRNA	79586	NM_024536	chr2	-	220406182	Ic	OtherPAS	9.1	12.3	1.4	3.9	chondroitin polymerizing factor	57.615	-1.2	-0.6	2	37
CHPF	mRNA	79586	NM_024536	chr2	-	220403676	S	AATAAA	90.9	-12.3	-1.4	3.9	chondroitin polymerizing factor	57.615	-1.2	-0.6	2	37
CYP1B1	mRNA	1545	NM_000104	chr2	-	38294292	L	AATAAA	25.1	13.5	3	3.9	cytochrome P450, family 1, subfamily B, polypeptide 1	363.651	-3.1	-41.1	3	128.3
ATP2C1	mRNA	27032	NM_001199179	chr3	+	130720621	F	AATAAA	84.2	-12.8	-0.4	3.9	ATPase, Ca++ transporting, type 2C, member 1	14.217	-1.5	-0.5	5	1.7
ABCF3	mRNA	55324	NM_018358	chr3	+	183912240	M	NoPAS	4.3	-3.7	-1.1	3.9	ATP-binding cassette, sub-family F (GCN20), member 3	87.546	1.2	1	3	2.6
POLR2H	mRNA	5437	NM_006232	chr3	+	184086331	F	ATTAAA	11.1	-2.3	-0.4	3.9	polymerase (RNA) II (DNA directed) polypeptide H	168.357	1.2	1.3	2	17.8
POLR2H	mRNA	5437	NM_006232	chr3	+	184086379	L	Arich	88.9	2.3	0.4	3.9	polymerase (RNA) II (DNA directed) polypeptide H	168.357	1.2	1.3	2	17.8
ATP11B	mRNA	23200	NM_014616	chr3	+	182640799	L	AATAAA	0	20	0.4	3.9	ATPase, class VI, type 11B	5.238	-1.5	-0.2	4	0.8
TGFB2	mRNA	7042	NM_001135599	chr1	+	218617338	L	AATAAA	66.2	-9.1	-0.3	3.9	transforming growth factor, beta 2	59.86	-6.3	-13.3	3	31.4
PQLC2	mRNA	54896	NM_001040125	chr1	+	19655794	M	AATAAA	66.7	-33.7	-3.9	3.9	PQ loop repeat containing 2	38.161	1.8	3.1	6	6
LPHN2	mRNA	23266	NM_012302	chr1	+	82458107	E	AATAAA	90.9	-90.9	-3.9	3.9	latrophilin 2	8.231	-1.5	-0.4	5	1
PPAP2B	mRNA	8613	NM_003713	chr1	-	56960433	F	AATAAA	4.3	-3.6	-1	3.9	phosphatidic acid phosphatase type 2B	52.378	1.8	4.7	2	4.7
PPAP2B	mRNA	8613	NM_003713	chr1	-	56948860	L	AATAAA	95.7	3.6	1	3.9	phosphatidic acid phosphatase type 2B	52.378	1.8	4.7	2	4.7
ZNF672	mRNA	79894	NM_024836	chr1	+	249140540	Ic	NoPAS	8.3	-1.8	0	3.9	zinc finger protein 672	17.958	1.2	0.2	4	6.8
TXNDC15	mRNA	79770	NM_024715	chr5	+	134237325	L	AATAAA	67.9	-9.6	-0.3	3.9	thioredoxin domain containing 15	20.951	2.3	4.1	6	4.1
HERC2	mRNA	8924	NM_004667	chr15	-	28524965	Ic	AATAAA	50	-40.9	-1.2	3.9	hect domain and RLD 2	8.979	-1.2	-0.2	4	2.6
TRIOBP	mRNA	11078	NM_001039141	chr22	+	38128928	Ic	AATAAA	0	0	NA	3.9	TRIO and F-actin binding protein	33.671	-1.2	-0.5	4	1.3
C19orf10	mRNA	56005	NM_019107	chr19	-	4657557	F	AATAAA	68.3	5.2	0.5	3.9	chromosome 19 open reading frame 10	92.035	2	10.6	2	10.6
C19orf10	mRNA	56005	NM_019107	chr19	-	4657509	L	NoPAS	31.7	-5.2	-0.5	3.9	chromosome 19 open reading frame 10	92.035	2	10.6	2	10.6
MEF2BNB-MEF2B	mRNA	4207	NM_005919	chr19	-	19287715	Is	NoPAS	82.2	-27.7	-3.9	3.9	MEF2BNB-MEF2B readthrough	88.294	-2	-5.2	1	5.2
GLT25D1	mRNA	79709	NM_024656	chr19	+	17693966	L	AATAAA	94.9	-13.5	-2.6	3.9	glycosyltransferase 25 domain containing 1	117.476	-2.5	-10.2	3	10.2
RP11-622J8.1	lncRNA	NA	ENST00000512546	chr4	+	60041883	F	AATAAA	NA	NA	NA	3.9		0	NA	0	2	1.8
RP11-622J8.1	lncRNA	NA	ENST00000512546	chr4	+	60044637	L	AATAAA	NA	NA	NA	3.9		0	NA	0	2	1.8
CPNE1	mRNA	8904	NM_003915	chr20	-	34213966	S	AATAAA	84.6	-0.8	0	3.8	copine I	48.636	1	0	1	10.5
RALGAPA2	mRNA	57186	NM_020343	chr20	-	20370202	L	AATAAA	90.5	-15.5	-0.6	3.8	Ral GTPase activating protein, alpha subunit 2 (catalytic)	15.713	-1.2	-0.2	4	4.1
POFUT1	mRNA	23509	NM_015352	chr20	+	30824519	M	NoPAS	8.9	11.1	1.7	3.8	protein O-fucosyltransferase 1	109.245	-2	-6.6	6	6.6
HDAC6	mRNA	10013	NM_006044	chrX	+	48665367	Ic	AATAAA	0	2.3	0	3.8	histone deacetylase 6	31.427	-1.1	-0.1	5	13.6
VAPA	mRNA	9218	NM_003574	chr18	+	9957686	M	AATAAA	0	0.3	0	3.8	VAMP (vesicle-associated membrane protein)-associated protein A, 33kDa	257.399	-1	-0.2	4	2.4
TCEB1	mRNA	6921	NM_001204858	chr8	-	74858630	M	AATAAA	20.7	13.6	1.5	3.8	transcription elongation factor B (SIII), polypeptide 1 (15kDa, elongin C)	83.056	-1.2	-0.9	6	23.1
PTK2	mRNA	5747	NM_001199649	chr8	-	141889265	Ic	AATAAA	2.6	33.1	3.8	3.8	PTK2 protein tyrosine kinase 2	28.434	-1	0	3	1.1
UBXN2B	mRNA	137886	NM_001077619	chr8	+	59364278	L	AATAAA	100	-1.1	-0.7	3.8	UBX domain protein 2B	172.846	-1.4	-2.9	4	2.9
OSTC	mRNA	58505	NM_021227	chr4	+	109578744	E	OtherPAS	7.7	-4.1	-0.2	3.8	oligosaccharyltransferase complex subunit	29.182	-1.5	-1.1	5	75
GDI2	mRNA	2665	NM_001494	chr10	-	5807185	L	AATAAA	68.7	-11.8	-0.7	3.8	GDP dissociation inhibitor 2	50.133	-1.3	-0.8	3	0.8
UBQLN1	mRNA	29979	NM_013438	chr9	-	86275787	F	ATTAAA	18.4	-3.9	-0.2	3.8	ubiquilin 1	28.434	1.6	1.8	5	1.8
GLIS3	mRNA	169792	NM_001042413	chr9	-	3824148	M	AATAAA	90.7	1.3	0.1	3.8	GLIS family zinc finger 3	64.35	1.2	0.5	3	72.4
RFK	mRNA	55312	NM_018339	chr9	-	79001518	F	OtherPAS	100	-15.8	0	3.8	riboflavin kinase	1.497	8.6	3.5	2	12.4
RFK	mRNA	55312	NM_018339	chr9	-	79000444	L	AATAAA	0	15.8	0	3.8	riboflavin kinase	1.497	8.6	3.5	2	12.4
DBNL	mRNA	28988	NM_001122956	chr7	+	44101021	M	NoPAS	51.1	7.4	0.4	3.8	drebrin-like	70.336	-2	-4.2	7	30
CTTN	mRNA	2017	NM_005231	chr11	+	70282681	M	AATAAA	27.3	8.5	0.5	3.8	cortactin	41.154	1.1	0.2	5	6.8
TTC17	mRNA	55761	NM_018259	chr11	+	43423172	Ic	OtherPAS	78.4	2.7	0.2	3.8	tetratricopeptide repeat domain 17	142.168	-1.5	-3.3	3	3.3
HSD17B12	mRNA	51144	NM_016142	chr11	+	43888840	L	ATTAAA	6.9	13.5	1.3	3.8	hydroxysteroid (17-beta) dehydrogenase 12	43.399	-1.2	-0.4	3	9.4
GALNTL4	mRNA	374378	NM_198516	chr11	-	11292410	S	AATAAA	75	14.8	0.7	3.8	UDP-N-acetyl-alpha-D-galactosamine:polypeptide N-acetylgalactosaminyltransferase-like 4	8.979	3.7	5.1	3	5.1
TRIP11	mRNA	9321	NM_004239	chr14	-	92504996	Ic	AATAAA	33.3	-13.3	0	3.8	thyroid hormone receptor interactor 11	2.245	1.5	0.1	6	0.7
PPP2R5E	mRNA	5529	NM_006246	chr14	-	63842154	F	OtherPAS	21.3	-11.5	-3.8	3.8	protein phosphatase 2, regulatory subunit B', epsilon isoform	168.357	1.5	5.3	3	5.3
MAP3K9	mRNA	4293	NM_033141	chr14	-	71196377	F	OtherPAS	43.1	-43.1	-3.8	3.8	mitogen-activated protein kinase kinase kinase 9	38.161	-2.8	-4.4	2	4.4
MAP3K9	mRNA	4293	NM_033141	chr14	-	71189243	L	AATAAA	56.9	43.1	3.8	3.8	mitogen-activated protein kinase kinase kinase 9	38.161	-2.8	-4.4	2	4.4
SBNO1	mRNA	55206	NM_001167856	chr12	-	123773656	L	AATAAA	55.2	13.7	0.5	3.8	strawberry notch homolog 1 (Drosophila)	21.699	1.4	0.8	5	0.8
ZNF384	mRNA	171017	NM_001135734	chr12	-	6775643	L	AATAAA	56	-17.1	-0.7	3.8	zinc finger protein 384	18.706	1.3	0.4	3	4.2
COL6A3	mRNA	1293	NM_004369	chr2	-	238232662	L	AATAAA	59	-12.9	-0.9	3.8	collagen, type VI, alpha 3	58.364	1	0.1	4	999
RPL37A	mRNA	6168	NM_000998	chr2	+	217366190	F	AATAAA	26.9	25.9	3.8	3.8	ribosomal protein L37a	89.042	-1.5	-2.3	4	33.2
RAB10	mRNA	10890	NM_016131	chr2	+	26357979	F	AATAAA	31.5	14.6	1.4	3.8	RAB10, member RAS oncogene family	68.839	1	0	4	4.5
CIAO1	mRNA	9391	NM_004804	chr2	+	96937381	M	OtherPAS	5.3	-4.5	-3.8	3.8	cytosolic iron-sulfur protein assembly 1	422.015	-1.7	-15.7	4	15.7
ANKRD13C	mRNA	81573	NM_030816	chr1	-	70724682	L	AATAAA	77.9	-30.1	-3.8	3.8	ankyrin repeat domain 13C	64.35	-1.4	-1.5	3	1.5
RWDD3	mRNA	25950	NM_015485	chr1	+	95712781	F	ATTAAA	85.7	-4.5	0	3.8	RWD domain containing 3	15.713	-1.5	-0.5	3	3.4
ABHD2	mRNA	11057	NM_007011	chr15	+	89738982	F	ATTAAA	33	-24.4	-3.8	3.8	abhydrolase domain containing 2	68.091	-1.2	-0.8	3	19.8
C15orf39	mRNA	56905	NM_015492	chr15	+	75504510	M	ATTAAA	33.3	50	1.2	3.8	chromosome 15 open reading frame 39	11.224	-2.8	-1.5	5	1.5
TRIOBP	mRNA	11078	NM_001039141	chr22	+	38155975	Is	AATAAA	24.4	0.6	0	3.8	TRIO and F-actin binding protein	33.671	-1.2	-0.5	4	1.3
KCTD17	mRNA	79734	NM_024681	chr22	+	37459425	F	AATAAA	100	0	0	3.8	potassium channel tetramerisation domain containing 17	219.986	1.4	6	2	6
KCTD17	mRNA	79734	NM_024681	chr22	+	37473833	L	AATAAA	0	0	NA	3.8	potassium channel tetramerisation domain containing 17	219.986	1.4	6	2	6
RAVER1	mRNA	125950	NM_133452	chr19	-	10446924	UA	AATAAA	0	11.1	0.3	3.8	ribonucleoprotein, PTB-binding 1	8.979	2	1.4	5	5
AIFM1	mRNA	9131	NM_001130847	chrX	-	129300882	UA	ATTAAA	87.7	4.5	0.5	3.7	apoptosis-inducing factor, mitochondrion-associated, 1	60.609	1.1	0.4	2	6.6
AIFM1	mRNA	9131	NM_001130847	chrX	-	129263342	S	AATAAA	12.3	-4.5	-0.5	3.7	apoptosis-inducing factor, mitochondrion-associated, 1	60.609	1.1	0.4	2	6.6
TGIF1	mRNA	7050	NM_170695	chr18	+	3458347	F	AATAAA	66.7	8.3	0.1	3.7	TGFB-induced factor homeobox 1	29.182	-3.6	-4.5	3	7.6
ALPK2	mRNA	115701	NM_052947	chr18	-	56148479	S	ATTAAA	80.4	16.7	3.7	3.7	alpha-kinase 2	38.161	3.1	13.8	3	13.8
LOC100127983	mRNA	100127983	NM_001190972	chr8	-	91969265	L	ATTAAA	64.6	9.5	0.6	3.7	uncharacterized LOC100127983	48.636	1.6	2.7	3	4
UBE2V2	mRNA	7336	NM_003350	chr8	+	48974123	F	AATAAA	76.1	5.4	0.5	3.7	ubiquitin-conjugating enzyme E2 variant 2	81.56	1.4	2.5	4	4.1
OTUD4	mRNA	54726	NM_001102653	chr4	-	146058281	F	OtherPAS	0	77.8	3.7	3.7	OTU domain containing 4	9.727	-1.6	-0.5	3	0.6
OTUD4	mRNA	54726	NM_001102653	chr4	-	146054802	L	ATTAAA	100	-77.8	-3.7	3.7	OTU domain containing 4	9.727	-1.6	-0.5	3	0.6
SPG20	mRNA	23111	NM_015087	chr13	-	36877739	M	ATTAAA	4.9	0.4	0	3.7	spastic paraplegia 20 (Troyer syndrome)	61.357	1.7	3.8	5	3.8
FAM192A	mRNA	80011	NM_024946	chr16	-	57188043	F	Arich	13	-10.3	-3.7	3.7	family with sequence similarity 192, member A	126.455	1	0	6	19.1
VSTM4	mRNA	196740	NM_001031746	chr10	-	50222418	L	AATAAA	81.5	1.4	0	3.7	V-set and transmembrane domain containing 4	40.406	-1.7	-1.8	5	26.4
ZNF503	mRNA	84858	NM_032772	chr10	-	77161852	UA	AATAAA	0	16.9	3.7	3.7	zinc finger protein 503	52.378	-1.2	-0.5	4	11.2
IPPK	mRNA	64768	NM_022755	chr9	-	95376753	M	Arich	62.5	-39.4	-3.7	3.7	inositol 1,3,4,5,6-pentakisphosphate 2-kinase	29.93	1.2	0.3	3	1.1
CCT6A	mRNA	908	NM_001762	chr7	+	56131265	M	OtherPAS	39	-25.7	-3.7	3.7	chaperonin containing TCP1, subunit 6A (zeta 1)	44.147	1.7	3.2	4	19.3
FAM126A	mRNA	84668	NM_032581	chr7	-	22983935	M	AATAAA	2.7	-1.7	-0.3	3.7	family with sequence similarity 126, member A	27.685	2.4	5.5	7	29.1
ZYX	mRNA	7791	NM_003461	chr7	+	143086363	Ic	NoPAS	6.3	10.6	3.6	3.7	zyxin	178.833	-1	-0.1	2	4.7
ZYX	mRNA	7791	NM_003461	chr7	+	143088204	S	AATAAA	93.7	-10.6	-3.6	3.7	zyxin	178.833	-1	-0.1	2	4.7
NUB1	mRNA	51667	NM_001243351	chr7	+	151058287	Is	AATAAA	0	0	NA	3.7	negative regulator of ubiquitin-like proteins 1	34.42	-1.3	-0.7	5	1.5
CTTN	mRNA	2017	NM_005231	chr11	+	70282961	L	AATAAA	18.2	-18.2	-3.7	3.7	cortactin	41.154	1.1	0.2	5	6.8
DPP3	mRNA	10072	NM_130443	chr11	+	66251300	Is	AATAAA	0.4	0	0	3.7	dipeptidyl-peptidase 3	338.21	-2.1	-21.7	2	114.6
DPP3	mRNA	10072	NM_130443	chr11	+	66277128	S	AATAAA	99.6	0	0	3.7	dipeptidyl-peptidase 3	338.21	-2.1	-21.7	2	114.6
ORAOV1	mRNA	220064	NM_153451	chr11	-	69486201	Ic	AATAAA	3.2	35.3	3.7	3.7	oral cancer overexpressed 1	23.196	1.5	1.1	6	4.4
PPFIA1	mRNA	8500	NM_003626	chr11	+	70230502	F	AATAAA	85.5	-4.2	-0.3	3.7	protein tyrosine phosphatase, receptor type, f polypeptide (PTPRF), interacting protein (liprin), alpha 1	87.546	-1.1	-0.2	3	4.3
INPPL1	mRNA	3636	NM_001567	chr11	+	71949978	F	OtherPAS	9.7	-1.8	-0.3	3.7	inositol polyphosphate phosphatase-like 1	115.231	1.8	8.8	2	76.2
INPPL1	mRNA	3636	NM_001567	chr11	+	71950149	L	AATAAA	90.3	1.8	0.3	3.7	inositol polyphosphate phosphatase-like 1	115.231	1.8	8.8	2	76.2
ITGB3	mRNA	3690	NM_000212	chr17	+	45391109	F	ATTAAA	22.3	-9.9	-3.7	3.7	integrin, beta 3 (platelet glycoprotein IIIa, antigen CD61)	282.091	1.1	0.6	4	46.6
SMARCE1	mRNA	6605	NM_003079	chr17	-	38805973	UA	ATTAAA	30	11.3	0.4	3.7	SWI/SNF related, matrix associated, actin dependent regulator of chromatin, subfamily e, member 1	29.93	1	0	4	7
CDCA4	mRNA	55038	NM_017955	chr14	-	105476278	M	ATTAAA	25	39.9	1.3	3.7	cell division cycle associated 4	5.986	6.4	8.6	5	15.6
PAPOLA	mRNA	10914	NM_032632	chr14	+	97001934	Ic	AATAAA	0	0	NA	3.7	poly(A) polymerase alpha	32.175	-1.1	-0.2	7	2.2
ZBTB24	mRNA	9841	NM_014797	chr6	-	109783797	M	ATTAAA	75	1.9	0	3.7	zinc finger and BTB domain containing 24	17.958	1.5	0.8	6	2.9
LYRM4	mRNA	57128	NM_001164841	chr6	-	5186834	Is	AATAAA	1	-0.5	0	3.7	LYR motif containing 4	154.888	-1.1	-0.5	3	13.1
RPP14	mRNA	11102	NM_001098783	chr3	+	58305800	M	OtherPAS	1.5	-0.7	-0.2	3.7	ribonuclease P/MRP 14kDa subunit	99.518	2.6	24	5	24
NCBP2	mRNA	22916	NM_007362	chr3	-	196662278	L	AATAAA	74.1	-10.6	-0.6	3.7	nuclear cap binding protein subunit 2, 20kDa	40.406	1.1	0.1	3	0.3
CCDC80	mRNA	151887	NM_199511	chr3	-	112315644	L	AATAAA	0	31.1	0.7	3.7	coiled-coil domain containing 80	5.238	9.5	13.1	3	38.2
DNAJB11	mRNA	51726	NM_016306	chr3	+	186303226	F	AATAAA	50.6	1.1	0	3.7	DnaJ (Hsp40) homolog, subfamily B, member 11	116.727	1.2	1.1	2	45
DNAJB11	mRNA	51726	NM_016306	chr3	+	186303582	L	OtherPAS	49.4	-1.1	0	3.7	DnaJ (Hsp40) homolog, subfamily B, member 11	116.727	1.2	1.1	2	45
UCHL5	mRNA	51377	NM_015984	chr1	-	192987535	Is	AATAAA	2.1	-2.1	-0.3	3.7	ubiquitin carboxyl-terminal hydrolase L5	35.168	1.1	0.1	6	5.1
CDC73	mRNA	79577	NM_024529	chr1	+	193223937	M	AATAAA	45	-40.6	-3.7	3.7	cell division cycle 73, Paf1/RNA polymerase II complex component, homolog (S. cerevisiae)	14.965	2	2.1	7	2.1
ZNF496	mRNA	84838	NM_032752	chr1	-	247463622	F	OtherPAS	23.8	-8.8	-0.2	3.7	zinc finger protein 496	15.713	-1.2	-0.2	6	1.4
PEX19	mRNA	5824	NM_002857	chr1	-	160248270	M	AATAAA	31.6	-17.2	-3.7	3.7	peroxisomal biogenesis factor 19	113.734	1.1	0.4	5	1.9
SRGAP2	mRNA	23380	NM_015326	chr1	+	206637774	L	AATAAA	39.1	50.6	3.7	3.7	SLIT-ROBO Rho GTPase activating protein 2	17.21	1.1	0.2	5	0.8
DFFA	mRNA	1676	NM_213566	chr1	-	10522898	M	OtherPAS	10.3	2.2	0	3.7	DNA fragmentation factor, 45kDa, alpha polypeptide	21.699	-1	0	9	1.6
NUCKS1	mRNA	64710	NM_022731	chr1	-	205686797	M	OtherPAS	5.3	2.3	0.1	3.7	nuclear casein kinase and cyclin-dependent kinase substrate 1	56.867	1.2	0.8	6	20.7
CENPH	mRNA	64946	NM_022909	chr5	+	68505652	F	NoPAS	23.1	59	3.7	3.7	centromere protein H	9.727	2.7	2.9	3	58.5
SUB1	mRNA	10923	NM_006713	chr5	+	32601236	F	AATAAA	0	0	NA	3.7	SUB1 homolog (S. cerevisiae)	11.224	1.3	0.4	4	32.4
TRMT2A	mRNA	27037	NM_022727	chr22	-	20099824	F	AATAAA	8.2	-2.4	-0.4	3.7	TRM2 tRNA methyltransferase 2 homolog A (S. cerevisiae)	109.993	1.4	2.5	2	2.5
TRMT2A	mRNA	27037	NM_022727	chr22	-	20099399	L	AATAAA	91.8	2.4	0.4	3.7	TRM2 tRNA methyltransferase 2 homolog A (S. cerevisiae)	109.993	1.4	2.5	2	2.5
WIZ	mRNA	58525	NM_021241	chr19	-	15532907	M	ATTAAA	100	-61.1	-1.4	3.7	widely interspaced zinc finger motifs	3.741	3.3	1.7	5	1.7
KAZALD1	mRNA	81621	uc001ksu.2	chr10	+	102826821	Ic	AATAAA	80	20	0.6	3.7	Kazal-type serine peptidase inhibitor domain 1	3.741	2.3	1	2	4.9
KAZALD1	mRNA	81621	uc001ksu.2	chr10	+	102827888	S	AATAAA	20	-20	-0.6	3.7	Kazal-type serine peptidase inhibitor domain 1	3.741	2.3	1	2	4.9
RALGAPB	mRNA	57148	NM_020336	chr20	+	37207501	L	ATTAAA	13.5	0.3	0	3.6	Ral GTPase activating protein, beta subunit (non-catalytic)	199.784	-1.5	-4.9	4	4.9
RNF24	mRNA	11237	NM_007219	chr20	-	3912068	M	ATTAAA	14.3	57.1	1.6	3.6	ring finger protein 24	5.238	1.8	0.6	8	0.6
C20orf112	mRNA	140688	NM_080616	chr20	-	31052583	Is	AATAAA	86.7	4.2	0	3.6	chromosome 20 open reading frame 112	11.224	-1.5	-0.5	5	1.5
PDK3	mRNA	5165	NM_001142386	chrX	+	24568583	L	AATAAA	0	62.5	3.6	3.6	pyruvate dehydrogenase kinase, isozyme 3	18.706	-3.5	-2.9	5	2.9
UBE2W	mRNA	55284	NM_001001481	chr8	-	74705192	F	OtherPAS	7.7	9.5	0.2	3.6	ubiquitin-conjugating enzyme E2W (putative)	9.727	2	1.4	6	4.2
MTDH	mRNA	92140	NM_178812	chr8	+	98738542	L	AATAAA	49.5	23.4	3.6	3.6	metadherin	81.56	1.1	0.2	4	1
SPP1	mRNA	6696	NM_001040058	chr4	+	88904480	F	AATAAA	44.4	-2	-0.1	3.6	secreted phosphoprotein 1	106.252	1.1	0.3	2	6.6
SPP1	mRNA	6696	NM_001040058	chr4	+	88904563	L	AATAAA	55.6	2	0.1	3.6	secreted phosphoprotein 1	106.252	1.1	0.3	2	6.6
TMCO3	mRNA	55002	NM_017905	chr13	+	114204544	M	ATTAAA	4.3	-4.3	0	3.6	transmembrane and coiled-coil domains 3	17.21	-1.5	-0.7	10	0.7
COL4A2	mRNA	1284	NM_001846	chr13	+	111165374	S	AATAAA	100	-37.3	-3.1	3.6	collagen, type IV, alpha 2	14.965	2.3	2.9	3	2.9
CUL4A	mRNA	8451	NM_001008895	chr13	+	113918857	F	ATTAAA	57.6	-8.4	-0.5	3.6	cullin 4A	63.602	-1.4	-1.6	5	3.4
C16orf52	mRNA	730094	NM_001164579	chr16	+	22092129	F	NoPAS	28.6	68.2	3.6	3.6	chromosome 16 open reading frame 52	5.238	4	3.6	6	3.6
KIAA0556	mRNA	23247	NM_015202	chr16	+	27694376	Ic	AATAAA	55.6	44.4	1	3.6	KIAA0556	6.734	-1.7	-0.4	2	1.3
KIAA0556	mRNA	23247	NM_015202	chr16	+	27791690	S	AATAAA	44.4	-44.4	-1	3.6	KIAA0556	6.734	-1.7	-0.4	2	1.3
SUMO3	mRNA	6612	NM_006936	chr21	-	46225777	M	ATTAAA	18.9	27.3	3.6	3.6	SMT3 suppressor of mif two 3 homolog 3 (S. cerevisiae)	55.371	1.1	0.3	3	27.2
C9orf9	mRNA	11092	NM_018956	chr9	+	135759695	Ic	AATAAA	1.9	-0.2	0	3.6	chromosome 9 open reading frame 9	271.616	-1.4	-4.6	3	8.2
C9orf95	mRNA	54981	NM_017881	chr9	-	77675493	L	AATAAA	0	0	NA	3.6	chromosome 9 open reading frame 95	2.993	4.1	2.1	3	9
ANGPTL2	mRNA	23452	NM_012098	chr9	-	129864507	Is	AATAAA	0	0	NA	3.6	angiopoietin-like 2	104.007	1	0	2	999
ANGPTL2	mRNA	23452	NM_012098	chr9	-	129850917	S	AATAAA	100	0	0	3.6	angiopoietin-like 2	104.007	1	0	2	999
CDK5RAP2	mRNA	55755	NM_018249	chr9	-	123151477	F	AATAAA	1.1	1	3.6	3.6	CDK5 regulatory subunit associated protein 2	3554.2	-1.4	-47.7	2	104.2
CDK5RAP2	mRNA	55755	NM_018249	chr9	-	123151153	L	ATTAAA	98.9	-1	-3.6	3.6	CDK5 regulatory subunit associated protein 2	3554.2	-1.4	-47.7	2	104.2
NUPL2	mRNA	11097	NM_007342	chr7	+	23236903	Is	AATAAA	49.1	2	0	3.6	nucleoporin like 2	39.657	-1.3	-0.7	4	15.4
PDAP1	mRNA	11333	NM_014891	chr7	-	98993608	F	ATTAAA	0	0	NA	3.6	PDGFA associated protein 1	22.448	2.2	3.6	3	11.1
CCDC85B	mRNA	11007	NM_006848	chr11	+	65659106	F	AATAAA	93.6	-12.6	-3.6	3.6	coiled-coil domain containing 85B	140.672	-1	-0.1	2	110.8
CCDC85B	mRNA	11007	NM_006848	chr11	+	65668383	L	AATAAA	6.4	12.6	3.6	3.6	coiled-coil domain containing 85B	140.672	-1	-0.1	2	110.8
TAX1BP3	mRNA	30851	NM_014604	chr17	-	3553420	L	AATAAA	1.2	-1.2	0	3.6	Tax1 (human T-cell leukemia virus type I) binding protein 3	62.853	-2	-3.8	3	89.6
ABCC3	mRNA	8714	NM_003786	chr17	+	48762825	Ic	AATAAA	43.6	20.1	3.6	3.6	ATP-binding cassette, sub-family C (CFTR/MRP), member 3	205.77	-2.5	-17.3	6	17.3
C17orf85	mRNA	55421	NM_018553	chr17	-	3715541	F	OtherPAS	60	-60	-3.6	3.6	chromosome 17 open reading frame 85	14.965	-1.6	-0.6	6	1.2
RPL23A	mRNA	6147	NM_000984	chr17	+	27050956	F	OtherPAS	79.9	1.6	0.2	3.6	ribosomal protein L23a	326.987	-1.2	-1.9	2	33.4
RPL23A	mRNA	6147	NM_000984	chr17	+	27051377	L	AATAAA	20.1	-1.6	-0.2	3.6	ribosomal protein L23a	326.987	-1.2	-1.9	2	33.4
TM9SF1	mRNA	10548	NM_006405	chr14	-	24661915	E	NoPAS	20	-4.8	-0.3	3.6	transmembrane 9 superfamily member 1	48.636	1.1	0.2	4	7.2
SMAGP	mRNA	57228	NM_001031628	chr12	-	51639135	F	ATTAAA	92.6	3.9	0.5	3.6	small cell adhesion glycoprotein	20.203	3.8	11.2	3	81.3
ZNF384	mRNA	171017	NM_001135734	chr12	-	6775904	M	OtherPAS	20	21.7	1	3.6	zinc finger protein 384	18.706	1.3	0.4	3	4.2
GAS2L3	mRNA	283431	NM_174942	chr12	+	101008553	Ic	OtherPAS	0	0	NA	3.6	growth arrest-specific 2 like 3	1.497	4.1	1.2	4	7
PA2G4	mRNA	5036	NM_006191	chr12	+	56497607	UA	AATAAA	58.1	7.9	0.5	3.6	proliferation-associated 2G4, 38kDa	46.392	1.4	1.4	3	11.4
LANCL1	mRNA	10314	NM_006055	chr2	-	211291842	L	OtherPAS	0	NA	NA	3.6	LanC lantibiotic synthetase component C-like 1 (bacterial)	3.741	-999	-1.6	4	2.3
HS1BP3	mRNA	64342	NM_022460	chr2	-	20821947	Is	AATAAA	41.2	2.3	0	3.6	HCLS1 binding protein 3	12.72	1.2	0.2	5	1.6
HS1BP3	mRNA	64342	NM_022460	chr2	-	20817582	F	AATAAA	41.2	-6.4	-0.1	3.6	HCLS1 binding protein 3	12.72	1.2	0.2	5	1.6
TRIM38	mRNA	10475	NM_006355	chr6	+	25984631	M	OtherPAS	31	-18	-0.7	3.6	tripartite motif containing 38	21.699	-1.4	-0.6	9	2.3
ENPP1	mRNA	5167	NM_006208	chr6	+	132216295	L	AATAAA	1.1	4.6	3.6	3.6	ectonucleotide pyrophosphatase/phosphodiesterase 1	338.21	-1.5	-7.5	3	999
SEC22C	mRNA	9117	NM_032970	chr3	-	42594245	F	ATTAAA	46.3	-29.4	-3.6	3.6	SEC22 vesicle trafficking protein homolog C (S. cerevisiae)	50.133	-1	-0.1	2	4.7
SEC22C	mRNA	9117	NM_032970	chr3	-	42589461	L	AATAAA	53.7	29.4	3.6	3.6	SEC22 vesicle trafficking protein homolog C (S. cerevisiae)	50.133	-1	-0.1	2	4.7
MINA	mRNA	84864	NM_001042533	chr3	-	97693966	UA	ATTAAA	10.5	33.9	1.2	3.6	MYC induced nuclear antigen	14.217	-2.3	-1.4	9	2.4
KIAA0090	mRNA	23065	NM_015047	chr1	-	19545427	M	OtherPAS	46.5	-0.3	0	3.6	KIAA0090	149.651	-1.4	-2.9	3	41.8
BTF3L4	mRNA	91408	NM_152265	chr1	+	52555199	M	ATTAAA	44.4	-17.5	-0.5	3.6	basic transcription factor 3-like 4	13.469	1.3	0.4	8	2.1
TOR1AIP1	mRNA	26092	NM_015602	chr1	+	179889206	M	AATAAA	16.7	67.9	3.6	3.6	torsin A interacting protein 1	13.469	-1.5	-0.6	6	0.7
ATAD3A	mRNA	55210	NM_018188	chr1	+	1470065	S	AATAAA	76.9	7.5	0.3	3.6	ATPase family, AAA domain containing 3A	19.455	1.6	1.1	3	23.8
CAPN2	mRNA	824	NM_001748	chr1	+	223957611	E	Arich	17.6	-2.7	-0.2	3.6	calpain 2, (m/II) large subunit	50.881	4.6	39.7	6	70.9
SH3GLB1	mRNA	51100	NM_001206651	chr1	+	87213865	L	AATAAA	50	15.9	0.7	3.6	SH3-domain GRB2-like endophilin B1	34.42	-1.2	-0.5	5	1.1
SLC1A3	mRNA	6507	NM_004172	chr5	+	36608656	S	Arich	62.5	-62.5	-3.6	3.6	solute carrier family 1 (glial high affinity glutamate transporter), member 3	5.986	2.7	1.9	5	8.2
TMED9	mRNA	54732	NM_017510	chr5	+	177023082	F	AATAAA	33.3	23.5	0.8	3.6	transmembrane emp24 protein transport domain containing 9	11.224	2.7	3.2	3	3.2
STC2	mRNA	8614	NM_003714	chr5	-	172741726	L	AATAAA	14.3	13.3	1.1	3.6	stanniocalcin 2	36.664	2.5	7.9	4	50.7
EDIL3	mRNA	10085	NM_005711	chr5	-	83236414	M	AATAAA	12	36.7	3.6	3.6	EGF-like repeats and discoidin I-like domains 3	37.413	-1.4	-1	3	7.8
NNT	mRNA	23530	NM_012343	chr5	+	43705590	M	OtherPAS	6.4	-6.4	-1	3.6	nicotinamide nucleotide transhydrogenase	35.168	-1	0	4	0.9
GABPB1	mRNA	2553	NM_005254	chr15	-	50578081	Ic	AATAAA	4.8	-0.3	0	3.6	GA binding protein transcription factor, beta subunit 1	15.713	1.9	1.8	4	1.8
EIF3J	mRNA	8669	NM_003758	chr15	+	44856784	L	OtherPAS	16.4	-8.3	-0.4	3.6	eukaryotic translation initiation factor 3, subunit J	45.643	-1.8	-2.4	6	9.1
SCAMP2	mRNA	10066	NM_005697	chr15	-	75137195	F	Arich	63.2	-10.1	-0.4	3.6	secretory carrier membrane protein 2	50.881	-2.4	-4.3	2	9.8
SCAMP2	mRNA	10066	NM_005697	chr15	-	75136071	L	AATAAA	36.8	10.1	0.4	3.6	secretory carrier membrane protein 2	50.881	-2.4	-4.3	2	9.8
TFIP11	mRNA	24144	NM_001008697	chr22	-	26910410	UA	OtherPAS	6.8	-1.9	0	3.6	tuftelin interacting protein 11	44.147	-1.6	-1.7	4	15.3
NDUFA6	mRNA	4700	NM_002490	chr22	-	42482118	F	AATAAA	99.1	-6.4	-3.6	3.6	NADH dehydrogenase (ubiquinone) 1 alpha subcomplex, 6, 14kDa	160.874	1.6	6.9	2	9.8
NDUFA6	mRNA	4700	NM_002490	chr22	-	42481530	L	AATAAA	0.9	6.4	3.6	3.6	NADH dehydrogenase (ubiquinone) 1 alpha subcomplex, 6, 14kDa	160.874	1.6	6.9	2	9.8
SYDE1	mRNA	85360	NM_033025	chr19	+	15223539	Ic	NoPAS	2.2	1.7	0.3	3.6	synapse defective 1, Rho GTPase, homolog 1 (C. elegans)	137.679	-1.3	-2	2	8
SYDE1	mRNA	85360	NM_033025	chr19	+	15225796	S	AATAAA	97.8	-1.7	-0.3	3.6	synapse defective 1, Rho GTPase, homolog 1 (C. elegans)	137.679	-1.3	-2	2	8
CRNKL1	mRNA	51340	NM_016652	chr20	-	20008836	L	AATAAA	0	13.6	0.3	3.5	crooked neck pre-mRNA splicing factor-like 1 (Drosophila)	5.986	2.5	1.6	11	1.6
PLXNB3	mRNA	5365	NM_001163257	chrX	+	153044796	S	AATAAA	33.3	44.5	0.6	3.5	plexin B3	2.245	2.7	0.8	3	11.1
SMC1A	mRNA	8243	NM_006306	chrX	-	53398313	M	AATAAA	16.7	29.5	0.4	3.5	structural maintenance of chromosomes 1A	4.49	3.9	3	9	3
TGIF1	mRNA	7050	NM_170695	chr18	+	3458409	L	AATAAA	25.6	-17.3	-0.4	3.5	TGFB-induced factor homeobox 1	29.182	-3.6	-4.5	3	7.6
SMAD2	mRNA	4087	NM_001003652	chr18	-	45368049	F	ATTAAA	52.1	6.8	0.3	3.5	SMAD family member 2	35.916	1.1	0.1	6	20.9
GTF2E2	mRNA	2961	NM_002095	chr8	-	30441942	Is	AATAAA	2.9	47.1	3.5	3.5	general transcription factor IIE, polypeptide 2, beta 34kDa	25.441	-2.7	-2.9	4	4.3
SLC25A32	mRNA	81034	NM_030780	chr8	-	104410873	M	AATAAA	6.7	10.7	0.7	3.5	solute carrier family 25, member 32	33.671	-2.2	-2.6	7	2.6
ERI1	mRNA	90459	NM_153332	chr8	+	8888416	M	AATAAA	33.3	66.7	0.8	3.5	exoribonuclease 1	2.245	1.2	0	6	1.4
CBR4	mRNA	84869	NM_032783	chr4	-	169908741	M	AATAAA	0	66.7	0	3.5	carbonyl reductase 4	0.748	2.7	0.2	4	0.6
PPAT	mRNA	5471	NM_002703	chr4	-	57259528	M	OtherPAS	1.7	2.5	0.3	3.5	phosphoribosyl pyrophosphate amidotransferase	44.147	-2.7	-4.7	8	4.7
SDAD1	mRNA	55153	NM_018115	chr4	-	76871068	M	AATAAA	46	5.9	0.3	3.5	SDA1 domain containing 1	37.413	-1.1	-0.1	4	2.7
SLC30A9	mRNA	10463	NM_006345	chr4	+	42101386	L	AATAAA	1.8	1.7	0.2	3.5	solute carrier family 30 (zinc transporter), member 9	83.804	-1.4	-2	3	4.5
FAM13A	mRNA	10144	NM_014883	chr4	-	89907805	Ic	AATAAA	6.2	-6.2	-0.4	3.5	family with sequence similarity 13, member A	11.972	1.2	0.2	6	1.8
DNAJC15	mRNA	29103	NM_013238	chr13	+	43681554	F	AATAAA	86.5	-29.6	-3.5	3.5	DnaJ (Hsp40) homolog, subfamily C, member 15	55.371	-1.6	-2	3	9
ORAI3	mRNA	93129	NM_152288	chr16	+	30967832	L	NoPAS	83.3	8.4	0	3.5	ORAI calcium release-activated calcium modulator 3	8.979	-1.1	-0.1	4	1.2
B3GNT9	mRNA	84752	NM_033309	chr16	-	67182007	M	ATTAAA	57.1	-48	-3.5	3.5	UDP-GlcNAc:betaGal beta-1,3-N-acetylglucosaminyltransferase 9	15.713	1.4	0.6	4	3.6
SYCE1L	mRNA	100130958	NM_001129979	chr16	+	77246900	S	AATAAA	82.4	7.6	0.9	3.5	synaptonemal complex central element protein 1-like	55.371	2.2	8.5	3	8.5
FAM192A	mRNA	80011	NM_024946	chr16	-	57187648	M	OtherPAS	39.6	-8.7	-1	3.5	family with sequence similarity 192, member A	126.455	1	0	6	19.1
COMMD3-BMI1	mRNA	100532731	NM_001204062	chr10	+	22619997	F	ATTAAA	7.7	6.6	0.2	3.5	COMMD3-BMI1 readthrough	19.455	-1	0	6	0.7
ZWINT	mRNA	11130	NM_032997	chr10	-	58117008	L	AATAAA	2.7	3.5	3.5	3.5	ZW10 interactor	575.407	1.6	22.9	3	205.2
ARID5B	mRNA	84159	NM_032199	chr10	+	63785114	Ic	OtherPAS	NA	NA	NA	3.5	AT rich interactive domain 5B (MRF1-like)	0	NA	0	2	1.1
ARID5B	mRNA	84159	NM_032199	chr10	+	63856699	S	AATAAA	NA	NA	NA	3.5	AT rich interactive domain 5B (MRF1-like)	0	NA	0	2	1.1
SHC3	mRNA	53358	NM_016848	chr9	-	91652274	Is	AATAAA	19.8	-14.1	-3.5	3.5	SHC (Src homology 2 domain containing) transforming protein 3	71.832	2.3	12.2	6	12.2
DDX31	mRNA	64794	NM_022779	chr9	-	135469676	M	Arich	56.4	-32.5	-3.5	3.5	DEAD (Asp-Glu-Ala-Asp) box polypeptide 31	41.154	1.1	0.2	5	1.2
VOPP1	mRNA	81552	NM_030796	chr7	-	55538387	F	OtherPAS	87.1	-9.6	-0.9	3.5	vesicular, overexpressed in cancer, prosurvival protein 1	46.392	2.2	7.2	3	9.9
RAB6A	mRNA	5870	NM_198896	chr11	-	73387002	F	OtherPAS	35.5	-7.2	-0.2	3.5	RAB6A, member RAS oncogene family	23.196	1.5	1.2	5	1.8
RRAS2	mRNA	22800	NM_012250	chr11	-	14300296	F	ATTAAA	36.4	-24.4	-1.5	3.5	related RAS viral (r-ras) oncogene homolog 2	41.154	-2.4	-3.8	3	5.7
COX11	mRNA	1353	NM_004375	chr17	-	53034118	L	AATAAA	91.7	-3.9	-0.2	3.5	COX11 cytochrome c oxidase assembly homolog (yeast)	44.895	1.2	0.6	6	1.2
C17orf51	mRNA	339263	NM_001113434	chr17	-	21431571	L	AATAAA	0	77.8	3.5	3.5	chromosome 17 open reading frame 51	8.979	-1.5	-0.4	8	0.6
MED6	mRNA	10001	NM_005466	chr14	-	71048385	M	NoPAS	0	12.5	0	3.5	mediator complex subunit 6	3.741	1.4	0.2	4	0.4
ZNF219	mRNA	51222	NM_016423	chr14	-	21558240	F	AATAAA	36.5	34.9	3.5	3.5	zinc finger protein 219	38.909	1.1	0.2	4	10.5
PCNX	mRNA	22990	NM_014982	chr14	+	71373369	UA	AATAAA	0	0	NA	3.5	pecanex homolog (Drosophila)	102.511	-2.2	-7.2	8	14.7
TRAF3	mRNA	7187	NM_145725	chr14	+	103372622	M	OtherPAS	15.9	0	0	3.5	TNF receptor-associated factor 3	47.14	1.2	0.4	3	13.6
PPP2R5C	mRNA	5527	NM_001161725	chr14	+	102233021	Ic	AATAAA	17.4	-15.1	-1.5	3.5	protein phosphatase 2, regulatory subunit B', gamma	34.42	-1.2	-0.3	6	1
GOLT1B	mRNA	51026	NM_016072	chr12	+	21671093	M	AATAAA	5.2	1.7	0.1	3.5	golgi transport 1B	57.615	-1.2	-0.5	4	0.5
PHLDA1	mRNA	22822	NM_007350	chr12	-	76422833	M	OtherPAS	1.6	-0.3	0	3.5	pleckstrin homology-like domain, family A, member 1	47.14	1.1	0.1	7	6.1
LOH12CR1	mRNA	118426	NM_058169	chr12	+	12619076	M	AATAAA	94.1	-12.1	-3.5	3.5	loss of heterozygosity, 12, chromosomal region 1	190.805	-2	-11.2	5	11.2
TTL	mRNA	150465	NM_153712	chr2	+	113253861	Ic	AATAAA	41.2	-38.9	-3.5	3.5	tubulin tyrosine ligase	12.72	2.3	2.7	5	14.2
GORASP2	mRNA	26003	NM_015530	chr2	+	171823193	M	NoPAS	71.8	-16.2	-1.1	3.5	golgi reassembly stacking protein 2, 55kDa	58.364	-1.9	-3.4	4	3.9
PTRHD1	mRNA	391356	NM_001013663	chr2	-	25013133	F	ATTAAA	100	-14.8	-3.5	3.5	peptidyl-tRNA hydrolase domain containing 1	56.867	-1	-0.1	3	15.8
TSPYL1	mRNA	7259	NM_003309	chr6	-	116597767	M	ATTAAA	3.3	-3.3	0	3.5	TSPY-like 1	22.448	-1.5	-0.8	7	1.3
HEBP2	mRNA	23593	NM_014320	chr6	+	138734433	M	OtherPAS	75.4	-0.1	0	3.5	heme binding protein 2	45.643	1.1	0.3	3	1.1
TATDN2	mRNA	9797	NM_014760	chr3	+	10322902	L	AATAAA	16.4	-3.4	-0.3	3.5	TatD DNase domain containing 2	123.462	-1.4	-2.3	3	4.8
C3orf18	mRNA	51161	NM_016210	chr3	-	50595462	F	ATTAAA	100	-6.5	-0.5	3.5	chromosome 3 open reading frame 18	23.196	1.8	2.2	2	2.2
C3orf18	mRNA	51161	NM_016210	chr3	-	50594201	L	AATAAA	0	6.5	0.5	3.5	chromosome 3 open reading frame 18	23.196	1.8	2.2	2	2.2
KLHL18	mRNA	23276	NM_025010	chr3	+	47388306	S	AATAAA	5.7	-4.7	-1	3.5	kelch-like 18 (Drosophila)	65.098	1.1	0.2	3	15.8
KPNA1	mRNA	3836	NM_002264	chr3	-	122144525	M	AATAAA	37.9	-24.9	-3.5	3.5	karyopherin alpha 1 (importin alpha 5)	65.098	-1.3	-0.8	10	10.6
SSR3	mRNA	6747	NM_007107	chr3	-	156259100	M	AATAAA	55.8	-13.6	-3.3	3.5	signal sequence receptor, gamma (translocon-associated protein gamma)	335.217	-1.9	-16.1	6	16.1
KIF21B	mRNA	23046	NM_017596	chr1	-	200938518	L	AATAAA	50	50	3.5	3.5	kinesin family member 21B	8.979	2	1.3	3	2.9
MRPS21	mRNA	54460	NM_018997	chr1	+	150280783	F	AATAAA	98.6	-18.9	-3.5	3.5	mitochondrial ribosomal protein S21	51.629	-1	-0.1	3	4
ALDH4A1	mRNA	8659	NM_003748	chr1	-	19209053	Is	AATAAA	89.5	10.5	0	3.5	aldehyde dehydrogenase 4 family, member A1	14.217	-3.5	-2.3	2	4.5
ALDH4A1	mRNA	8659	NM_003748	chr1	-	19197924	S	AATAAA	10.5	-10.5	0	3.5	aldehyde dehydrogenase 4 family, member A1	14.217	-3.5	-2.3	2	4.5
MEF2D	mRNA	4209	NM_005920	chr1	-	156436009	M	NoPAS	66.7	-25.8	-0.6	3.5	myocyte enhancer factor 2D	8.979	1.7	0.8	4	7.1
IL31RA	mRNA	133396	NM_001242638	chr5	+	55187141	Ic	AATAAA	72.7	-4.8	-0.2	3.5	interleukin 31 receptor A	49.385	-1.4	-1.1	11	1.1
ELL2	mRNA	22936	NM_012081	chr5	-	95220802	L	AATAAA	91	7.5	2	3.5	elongation factor, RNA polymerase II, 2	100.266	-1.1	-0.4	3	13
ADAM10	mRNA	102	NM_001110	chr15	-	58886813	L	AATAAA	25.5	32.6	3.5	3.5	ADAM metallopeptidase domain 10	41.154	1.2	0.5	5	0.5
UBE2L3	mRNA	7332	NM_003347	chr22	+	21977778	M	AATAAA	8.3	1.6	0.2	3.5	ubiquitin-conjugating enzyme E2L 3	89.79	1.1	0.2	3	2.5
TTLL12	mRNA	23170	NM_015140	chr22	-	43562628	M	AATAAA	0	6.7	0	3.5	tubulin tyrosine ligase-like family, member 12	8.231	2.5	1.9	4	2.5
C19orf66	mRNA	55337	NM_018381	chr19	+	10203051	M	NoPAS	24.1	-17.1	-3.5	3.5	chromosome 19 open reading frame 66	59.112	1.8	4.9	3	13.3
SAFB2	mRNA	9667	NM_014649	chr19	-	5587075	F	AATAAA	72.3	4	0.2	3.5	scaffold attachment factor B2	62.105	1.2	0.8	2	3.5
SAFB2	mRNA	9667	NM_014649	chr19	-	5587010	L	AATAAA	27.7	-4	-0.2	3.5	scaffold attachment factor B2	62.105	1.2	0.8	2	3.5
NCOA3	mRNA	8202	NM_181659	chr20	+	46285616	L	AATAAA	62.8	-15.4	-0.6	3.4	nuclear receptor coactivator 3	32.175	-2.5	-3.1	8	6.5
C20orf20	mRNA	55257	NM_018270	chr20	+	61431421	F	AATAAA	65	31.9	3.4	3.4	chromosome 20 open reading frame 20	14.965	2.9	5	2	10.7
C20orf20	mRNA	55257	NM_018270	chr20	+	61431945	L	ATTAAA	35	-31.9	-3.4	3.4	chromosome 20 open reading frame 20	14.965	2.9	5	2	10.7
SNRPD1	mRNA	6632	NM_006938	chr18	+	19213481	L	AATAAA	3.9	-2	-0.6	3.4	small nuclear ribonucleoprotein D1 polypeptide 16kDa	172.846	-1.2	-1.2	3	110.5
TMEM67	mRNA	91147	NM_153704	chr8	+	94830347	L	OtherPAS	4.2	22	3.4	3.4	transmembrane protein 67	53.126	-1.3	-0.8	5	1.3
CYHR1	mRNA	50626	NM_138496	chr8	-	145674970	M	ATTAAA	4.6	-0.4	0	3.4	cysteine/histidine-rich 1	65.098	1.2	0.9	5	2.6
CPNE3	mRNA	8895	NM_003909	chr8	+	87573724	L	AATAAA	60.6	34.3	3.4	3.4	copine III	24.692	1.1	0.1	4	0.8
CLN8	mRNA	2055	NM_018941	chr8	+	1744209	M	AATAAA	71.4	-39.1	-1	3.4	ceroid-lipofuscinosis, neuronal 8 (epilepsy, progressive with mental retardation)	5.238	4	3.6	7	3.6
NSMCE2	mRNA	286053	NM_173685	chr8	+	126379367	F	AATAAA	50	5.6	0.2	3.4	non-SMC element 2, MMS21 homolog (S. cerevisiae)	28.434	-1.2	-0.2	2	3
NSMCE2	mRNA	286053	NM_173685	chr8	+	126379451	L	NoPAS	50	-5.6	-0.2	3.4	non-SMC element 2, MMS21 homolog (S. cerevisiae)	28.434	-1.2	-0.2	2	3
FDFT1	mRNA	2222	NM_004462	chr8	+	11696471	M	ATTAAA	30.4	-1.8	0	3.4	farnesyl-diphosphate farnesyltransferase 1	41.902	-2.2	-3.4	4	17.3
SRP72	mRNA	6731	NM_006947	chr4	+	57368114	F	AATAAA	48.1	-3.5	-0.2	3.4	signal recognition particle 72kDa	80.811	-1.2	-0.6	5	2.6
NDFIP2	mRNA	54602	NM_019080	chr13	+	80127057	F	AATAAA	16.3	-1.8	-0.1	3.4	Nedd4 family interacting protein 2	64.35	-1.7	-2.9	6	3.5
IPO5	mRNA	3843	NM_002271	chr13	+	98676550	L	AATAAA	38	15.1	1	3.4	importin 5	37.413	1.5	1.4	4	40.8
CLYBL	mRNA	171425	NM_206808	chr13	+	100544824	S	ATTAAA	50	23.3	0.5	3.4	citrate lyase beta like	13.469	-1.3	-0.3	4	8.1
CHD9	mRNA	80205	NM_025134	chr16	+	53359033	F	OtherPAS	0	0	NA	3.4	chromodomain helicase DNA binding protein 9	4.49	5.3	4.9	9	4.9
EARS2	mRNA	124454	NM_001083614	chr16	-	23524321	M	ATTAAA	0	2.6	1.9	3.4	glutamyl-tRNA synthetase 2, mitochondrial (putative)	192.301	-1.5	-4.6	5	8.9
LDB1	mRNA	8861	NM_003893	chr10	-	103866249	F	AATAAA	87.8	-20.6	-3.4	3.4	LIM domain binding 1	67.343	1.3	1.5	2	1.5
LDB1	mRNA	8861	NM_003893	chr10	-	103860103	L	ATTAAA	12.2	20.6	3.4	3.4	LIM domain binding 1	67.343	1.3	1.5	2	1.5
BNIP3	mRNA	664	NM_004052	chr10	-	133781864	F	AATAAA	84.5	4.5	0.7	3.4	BCL2/adenovirus E1B 19kDa interacting protein 3	86.797	2.8	25	3	25
GPAM	mRNA	57678	NM_020918	chr10	-	113911689	M	OtherPAS	65.2	-54.7	-3.4	3.4	glycerol-3-phosphate acyltransferase, mitochondrial	17.21	-1.3	-0.4	4	5.3
NCS1	mRNA	23413	NM_014286	chr9	+	132995861	M	NoPAS	35.6	-14.5	-1.8	3.4	neuronal calcium sensor 1	134.686	-2.2	-9.7	7	50.9
TMEM38B	mRNA	55151	NM_018112	chr9	+	108536380	F	AATAAA	83.3	-75	-3.4	3.4	transmembrane protein 38B	4.49	5.4	5.1	5	5.1
TRIM4	mRNA	89122	NM_033017	chr7	-	99488574	M	ATTAAA	0	0	NA	3.4	tripartite motif containing 4	8.231	1.1	0.1	11	1.5
PGAM2	mRNA	5224	NM_000290	chr7	-	44108852	UA	OtherPAS	3.2	9.8	3.4	3.4	phosphoglycerate mutase 2 (muscle)	165.364	-1.4	-2.9	2	8.4
PGAM2	mRNA	5224	NM_000290	chr7	-	44083773	S	NoPAS	96.8	-9.8	-3.4	3.4	phosphoglycerate mutase 2 (muscle)	165.364	-1.4	-2.9	2	8.4
PDAP1	mRNA	11333	NM_014891	chr7	-	98992296	L	AATAAA	100	-5.5	-0.5	3.4	PDGFA associated protein 1	22.448	2.2	3.6	3	11.1
CFL1	mRNA	1072	NM_005507	chr11	-	65622426	F	NoPAS	6.9	28.5	3.4	3.4	cofilin 1 (non-muscle)	43.399	-1.3	-0.8	5	66.1
OAF	mRNA	220323	NM_178507	chr11	+	120100650	F	AATAAA	NA	NA	NA	3.4	OAF homolog (Drosophila)	0	999	0.9	3	1.7
OAF	mRNA	220323	NM_178507	chr11	+	120106161	L	ATTAAA	NA	NA	NA	3.4	OAF homolog (Drosophila)	0	999	0.9	3	1.7
SLC36A4	mRNA	120103	NM_152313	chr11	-	92880850	L	AATAAA	45.7	-6	-0.2	3.4	solute carrier family 36 (proton/amino acid symporter), member 4	26.189	1.6	1.7	3	1.7
CD59	mRNA	966	NM_001127223	chr11	-	33730413	M	Arich	2.3	6.5	3.4	3.4	CD59 molecule, complement regulatory protein	193.798	1.6	9.7	5	33.2
ARRB1	mRNA	408	NM_004041	chr11	-	74971166	L	AATAAA	12	45.6	3.4	3.4	arrestin, beta 1	18.706	1.2	0.3	6	0.5
HSD17B12	mRNA	51144	NM_016142	chr11	+	43878165	F	AATAAA	86.2	-6.6	-0.3	3.4	hydroxysteroid (17-beta) dehydrogenase 12	43.399	-1.2	-0.4	3	9.4
COPZ2	mRNA	51226	NM_016429	chr17	-	46103797	F	ATTAAA	59.3	-7.3	-0.2	3.4	coatomer protein complex, subunit zeta 2	20.203	2.5	4.8	3	10.4
RABEP1	mRNA	9135	NM_004703	chr17	+	5289130	M	ATTAAA	45	-4.8	-0.2	3.4	rabaptin, RAB GTPase binding effector protein 1	44.895	1.7	3	5	3
MRPS23	mRNA	51649	NM_016070	chr17	-	55912142	L	AATAAA	1.7	-1.7	0	3.4	mitochondrial ribosomal protein S23	44.147	-1.4	-1	3	24.1
CDCA4	mRNA	55038	NM_017955	chr14	-	105476916	M	NoPAS	0	10.5	0	3.4	cell division cycle associated 4	5.986	6.4	8.6	5	15.6
WDR89	mRNA	112840	NM_001008726	chr14	-	64063757	M	ATTAAA	11.8	-8.8	-0.6	3.4	WD repeat domain 89	12.72	1.8	1.2	6	1.4
PTGES3	mRNA	10728	NM_006601	chr12	-	57057382	F	AATAAA	3.4	-3.4	-0.5	3.4	prostaglandin E synthase 3 (cytosolic)	21.699	2.1	3	3	84.2
PTGES3	mRNA	10728	NM_006601	chr12	-	57057133	L	AATAAA	55.2	-11.3	-0.4	3.4	prostaglandin E synthase 3 (cytosolic)	21.699	2.1	3	3	84.2
RNF34	mRNA	80196	NM_194271	chr12	+	121862154	F	AATAAA	93.4	4.1	0.7	3.4	ring finger protein 34	90.539	-1.1	-0.5	2	33
RNF34	mRNA	80196	NM_194271	chr12	+	121862707	L	AATAAA	6.6	-4.1	-0.7	3.4	ring finger protein 34	90.539	-1.1	-0.5	2	33
DYNLL1	mRNA	8655	NM_001037494	chr12	+	120936201	F	OtherPAS	5.9	-2.7	-0.3	3.4	dynein, light chain, LC8-type 1	76.322	-1.2	-0.6	2	19.6
DYNLL1	mRNA	8655	NM_001037494	chr12	+	120936296	L	AATAAA	94.1	2.7	0.3	3.4	dynein, light chain, LC8-type 1	76.322	-1.2	-0.6	2	19.6
TMEM87B	mRNA	84910	NM_032824	chr2	+	112876891	L	AATAAA	5.6	12.5	0.5	3.4	transmembrane protein 87B	13.469	5.8	16.1	4	16.1
RETSAT	mRNA	54884	NM_017750	chr2	-	85568034	M	Arich	81.1	15.8	3.4	3.4	retinol saturase (all-trans-retinol 13,14-reductase)	55.371	1.6	2.7	3	3.4
LRPPRC	mRNA	10128	NM_133259	chr2	-	44169838	Ic	AATAAA	1.8	-1.8	0	3.4	leucine-rich PPR-motif containing	42.65	-1.3	-0.7	4	5.2
SLC35B3	mRNA	51000	NM_015948	chr6	-	8425244	Ic	AATAAA	45.5	-45.5	-3.4	3.4	solute carrier family 35, member B3	8.231	2.8	2.6	7	2.6
DHX16	mRNA	8449	NM_003587	chr6	-	30620904	M	AATAAA	86.2	-25.4	-3.4	3.4	DEAH (Asp-Glu-Ala-His) box polypeptide 16	48.636	1.4	1.5	4	5.3
C6orf35	mRNA	729515	NM_018452	chr6	-	157713526	F	ATTAAA	90.2	-4.5	-0.3	3.4	transmembrane protein 242	45.643	-1.4	-1	3	1
GMNN	mRNA	51053	NM_015895	chr6	+	24786327	L	OtherPAS	0	0	NA	3.4	geminin, DNA replication inhibitor	8.231	-1.5	-0.4	3	13.9
FAM120B	mRNA	84498	NM_032448	chr6	+	170714166	F	AATAAA	7.1	8.1	0.2	3.4	family with sequence similarity 120B	10.476	2.1	1.7	9	1.7
PBRM1	mRNA	55193	NM_018313	chr3	-	52579383	M	AATAAA	20	14.2	0	3.4	polybromo 1	3.741	6.9	6.1	8	6.1
RHOA	mRNA	387	NM_001664	chr3	-	49397045	F	AATAAA	16.6	-8.4	-3.4	3.4	ras homolog gene family, member A	279.847	-1.1	-0.4	3	29.8
CCDC80	mRNA	151887	NM_199511	chr3	-	112324112	F	AATAAA	100	-41.9	-1.4	3.4	coiled-coil domain containing 80	5.238	9.5	13.1	3	38.2
HPS3	mRNA	84343	NM_032383	chr3	+	148877724	Ic	ATTAAA	39.5	0	0	3.4	Hermansky-Pudlak syndrome 3	32.175	-1.3	-0.5	6	0.5
RLF	mRNA	6018	NM_012421	chr1	+	40706354	F	ATTAAA	81.2	-63.6	-3.4	3.4	rearranged L-myc fusion	11.972	-1	0	2	5
RLF	mRNA	6018	NM_012421	chr1	+	40706593	L	AATAAA	18.8	63.6	3.4	3.4	rearranged L-myc fusion	11.972	-1	0	2	5
DPH2	mRNA	1802	NM_001384	chr1	+	44433691	UA	AATAAA	0.3	5.8	3.4	3.4	DPH2 homolog (S. cerevisiae)	279.847	-4.2	-44.4	3	44.4
TIPRL	mRNA	261726	NM_152902	chr1	+	168169446	F	AATAAA	84.3	-51	-1.8	3.4	TIP41, TOR signaling pathway regulator-like (S. cerevisiae)	38.161	-9.4	-10.5	3	10.5
SLC2A1	mRNA	6513	NM_006516	chr1	-	43391626	M	OtherPAS	10.3	-4.1	-0.6	3.4	solute carrier family 2 (facilitated glucose transporter), member 1	50.881	2.6	12.1	7	85.5
PHAX	mRNA	51808	NM_032177	chr5	+	125966344	L	NoPAS	9.7	13.2	3.4	3.4	phosphorylated adaptor for RNA export	138.427	1.2	0.8	3	2.3
CLK3	mRNA	1198	NM_001130028	chr15	+	74937759	L	OtherPAS	0	22.2	0.9	3.4	CDC-like kinase 3	11.972	-2	-1	3	1.7
CHRNA5	mRNA	1138	NM_000745	chr15	+	78882589	E	OtherPAS	0	0	NA	3.4	cholinergic receptor, nicotinic, alpha 5	0.748	3.6	0.4	9	2.1
MESDC2	mRNA	23184	NM_015154	chr15	-	81270722	M	OtherPAS	27.1	23.8	3.4	3.4	mesoderm development candidate 2	63.602	1.7	4.1	6	8.7
SUN2	mRNA	25777	NM_001199579	chr22	-	39130739	F	AATAAA	93	2.1	0.3	3.4	Sad1 and UNC84 domain containing 2	106.252	1.4	3.1	2	4.7
SUN2	mRNA	25777	NM_001199579	chr22	-	39129283	L	AATAAA	7	-2.1	-0.3	3.4	Sad1 and UNC84 domain containing 2	106.252	1.4	3.1	2	4.7
DOT1L	mRNA	84444	NM_032482	chr19	+	2232577	L	AATAAA	92.9	-10.7	-1.7	3.4	DOT1-like, histone H3 methyltransferase (S. cerevisiae)	83.804	-1.2	-0.8	3	3.9
AKT2	mRNA	208	NM_001626	chr19	-	40738241	F	AATAAA	93.9	4.1	1.6	3.4	v-akt murine thymoma viral oncogene homolog 2	73.329	6	89.3	2	89.3
AKT2	mRNA	208	NM_001626	chr19	-	40736224	L	AATAAA	6.1	-4.1	-1.6	3.4	v-akt murine thymoma viral oncogene homolog 2	73.329	6	89.3	2	89.3
TIMM13	mRNA	26517	NM_012458	chr19	-	2426563	M	AATAAA	91.1	-1.9	-0.4	3.4	translocase of inner mitochondrial membrane 13 homolog (yeast)	234.203	1.8	16.3	3	25.1
ELAVL1	mRNA	1994	NM_001419	chr19	-	8023457	L	AATAAA	0	0	NA	3.4	ELAV (embryonic lethal, abnormal vision, Drosophila)-like 1 (Hu antigen R)	47.14	-1.2	-0.5	5	0.5
LINC00273	lncRNA	649159	NR_038368	chr16	-	33963192	UA	Arich	8.3	-2.6	-0.2	3.4	long intergenic non-protein coding RNA 273	35.916	-1	0	5	5.3
LOC400927	lncRNA	400927	NR_002821	chr22	-	38753759	Is	ATTAAA	40	60	3.4	3.4	TPTE and PTEN homologous inositol lipid phosphatase pseudogene	7.483	1.7	0.7	3	1.1
LOC400927	lncRNA	400927	NR_002821	chr22	-	38750870	Is	ATTAAA	60	-60	-3.4	3.4	TPTE and PTEN homologous inositol lipid phosphatase pseudogene	7.483	1.7	0.7	3	1.1
TP53RK	mRNA	112858	NM_033550	chr20	-	45315282	F	OtherPAS	98.2	-6.4	-3.3	3.3	TP53 regulating kinase	245.427	-1.6	-7	2	8
TP53RK	mRNA	112858	NM_033550	chr20	-	45313872	L	NoPAS	1.8	6.4	3.3	3.3	TP53 regulating kinase	245.427	-1.6	-7	2	8
PSMF1	mRNA	9491	NM_006814	chr20	+	1147961	L	AATAAA	2.3	5.7	3.3	3.3	proteasome (prosome, macropain) inhibitor subunit 1 (PI31)	318.756	-1.4	-5.5	3	30
TM9SF4	mRNA	9777	NM_014742	chr20	+	30755058	L	AATAAA	25.7	5.5	0.2	3.3	transmembrane 9 superfamily protein member 4	26.189	1.7	1.8	4	1.8
GNL3L	mRNA	54552	NM_001184819	chrX	+	54596486	L	AATAAA	1.9	-1.9	0	3.3	guanine nucleotide binding protein-like 3 (nucleolar)-like	40.406	-3.1	-5.3	5	5.3
COL4A6	mRNA	1288	NM_033641	chrX	-	107398844	S	AATAAA	0	0	NA	3.3	collagen, type IV, alpha 6	7.483	-1.1	-0.1	4	2.6
HDAC6	mRNA	10013	NM_006044	chrX	+	48683386	S	AATAAA	92.9	-6.5	-0.3	3.3	histone deacetylase 6	31.427	-1.1	-0.1	5	13.6
AP3M2	mRNA	10947	NM_001134296	chr8	+	42028700	L	AATAAA	40	-21	-0.7	3.3	adaptor-related protein complex 3, mu 2 subunit	14.965	-1.1	-0.1	3	1
PEX2	mRNA	5828	NM_001172086	chr8	-	77895157	F	OtherPAS	96.6	-1.5	0	3.3	peroxisomal biogenesis factor 2	44.147	-1.1	-0.2	2	2.2
PEX2	mRNA	5828	NM_001172086	chr8	-	77894297	L	AATAAA	3.4	1.5	0	3.3	peroxisomal biogenesis factor 2	44.147	-1.1	-0.2	2	2.2
CDCA2	mRNA	157313	NM_152562	chr8	+	25372446	M	AATAAA	3.1	29.7	3.3	3.3	cell division cycle associated 2	23.944	3.3	10	7	10
LOXL2	mRNA	4017	NM_002318	chr8	-	23155035	F	OtherPAS	1	-1	-0.5	3.3	lysyl oxidase-like 2	75.574	1.7	4.6	5	157.5
KLF10	mRNA	7071	NM_001032282	chr8	-	103661075	F	ATTAAA	78.1	-8.3	-0.4	3.3	Kruppel-like factor 10	23.944	1.2	0.4	4	5.6
HGSNAT	mRNA	138050	NM_152419	chr8	+	43055072	F	Arich	67.7	-47.7	-3.3	3.3	heparan-alpha-glucosaminide N-acetyltransferase	23.196	-1.4	-0.6	4	0.7
FDFT1	mRNA	2222	NM_004462	chr8	+	11696807	M	AATAAA	12.5	16.1	0.9	3.3	farnesyl-diphosphate farnesyltransferase 1	41.902	-2.2	-3.4	4	17.3
DCTN6	mRNA	10671	NM_006571	chr8	+	30058788	L	AATAAA	2.6	27.6	3.3	3.3	dynactin 6	29.182	1.5	1.1	7	1.2
MRFAP1	mRNA	93621	NM_033296	chr4	+	6644456	L	AATAAA	16.7	-3.4	0	3.3	Morf4 family associated protein 1	13.469	-1.3	-0.3	7	9.2
SLC30A9	mRNA	10463	NM_006345	chr4	+	42089551	F	AATAAA	41.1	25.2	3.3	3.3	solute carrier family 30 (zinc transporter), member 9	83.804	-1.4	-2	3	4.5
IQCK	mRNA	124152	NM_153208	chr16	+	19868687	F	AATAAA	24	-24	-3.3	3.3	IQ motif containing K	18.706	2.1	2.6	4	2.6
C16orf52	mRNA	730094	NM_001164579	chr16	+	22087380	Ic	AATAAA	57.1	-57.1	-3.3	3.3	chromosome 16 open reading frame 52	5.238	4	3.6	6	3.6
PSKH1	mRNA	5681	NM_006742	chr16	+	67963579	L	NoPAS	77.8	-69.5	-3.3	3.3	protein serine kinase H1	13.469	-1.7	-0.7	3	2.6
COX4NB	mRNA	10328	NM_006067	chr16	-	85812230	M	AATAAA	44.4	1.4	0	3.3	COX4 neighbor	33.671	-1	0	7	19.1
NETO2	mRNA	81831	NM_018092	chr16	-	47116740	F	AATAAA	91.4	-26.5	-3.3	3.3	neuropilin (NRP) and tolloid (TLL)-like 2	69.588	-2.8	-7.5	6	28.9
USP7	mRNA	7874	NM_003470	chr16	-	8987349	M	AATAAA	30.6	7.7	0.3	3.3	ubiquitin specific peptidase 7 (herpes virus-associated)	26.937	1.2	0.3	9	0.8
ANKRD16	mRNA	54522	NM_019046	chr10	-	5920052	Ic	AATAAA	100	0	0	3.3	ankyrin repeat domain 16	0.748	9	1.9	3	1.9
TM9SF3	mRNA	56889	NM_020123	chr10	-	98280430	M	AATAAA	70.5	-0.3	0	3.3	transmembrane 9 superfamily member 3	32.923	1.9	3.6	4	3.6
DHX32	mRNA	55760	NM_018180	chr10	-	127524906	L	AATAAA	0	9.5	0.3	3.3	DEAH (Asp-Glu-Ala-His) box polypeptide 32	15.713	-1.1	-0.1	4	1.1
RUNX1	mRNA	861	NM_001001890	chr21	-	36160582	M	AATAAA	6.2	-4.4	-0.4	3.3	runt-related transcription factor 1	47.888	-1.3	-0.8	5	4.5
PDXK	mRNA	8566	NM_003681	chr21	+	45176095	M	NoPAS	21.4	19.6	3.3	3.3	pyridoxal (pyridoxine, vitamin B6) kinase	143.665	-2	-8.5	6	8.5
C9orf9	mRNA	11092	NM_018956	chr9	+	135759761	Ic	NoPAS	0.8	0.6	0.2	3.3	chromosome 9 open reading frame 9	271.616	-1.4	-4.6	3	8.2
RPL12	mRNA	6136	NM_000976	chr9	-	130210615	Ic	NoPAS	0	0	NA	3.3	ribosomal protein L12	86.049	1	0.1	2	11.7
RPL12	mRNA	6136	NM_000976	chr9	-	130209955	S	AATAAA	100	0	0	3.3	ribosomal protein L12	86.049	1	0.1	2	11.7
HERPUD2	mRNA	64224	NM_022373	chr7	-	35733877	E	ATTAAA	48	-30.4	-1.3	3.3	HERPUD family member 2	18.706	-1.6	-0.9	4	7
ASL	mRNA	435	NM_001024943	chr7	+	65557941	F	AATAAA	60	-47.9	-3.3	3.3	argininosuccinate lyase	14.965	1.5	0.8	5	3.1
NOM1	mRNA	64434	NM_138400	chr7	+	156756042	Ic	NoPAS	0	1.9	1	3.3	nucleolar protein with MIF4G domain 1	141.42	-1.3	-1.9	2	11.8
NOM1	mRNA	64434	NM_138400	chr7	+	156765868	S	AATAAA	100	-1.9	-1	3.3	nucleolar protein with MIF4G domain 1	141.42	-1.3	-1.9	2	11.8
CHCHD3	mRNA	54927	NM_017812	chr7	-	132457968	L	AATAAA	7.7	17.3	1.6	3.3	coiled-coil-helix-coiled-coil-helix domain containing 3	29.182	1.9	2.9	7	4.8
NAP1L4	mRNA	4676	NM_005969	chr11	-	2972489	E	NoPAS	7.1	-4	-0.7	3.3	nucleosome assembly protein 1-like 4	74.077	1.2	0.6	3	10.8
YIF1A	mRNA	10897	NM_020470	chr11	-	66058099	UA	AATAAA	11.1	-11.1	-1	3.3	Yip1 interacting factor homolog A (S. cerevisiae)	20.203	-1	0	2	14.7
YIF1A	mRNA	10897	NM_020470	chr11	-	66052051	S	NoPAS	88.9	11.1	1	3.3	Yip1 interacting factor homolog A (S. cerevisiae)	20.203	-1	0	2	14.7
BAIAP2	mRNA	10458	NM_006340	chr17	+	79084313	Is	AATAAA	35.7	34.7	1.3	3.3	BAI1-associated protein 2	10.476	1.7	0.9	5	22.3
BIRC5	mRNA	332	NM_001012271	chr17	+	76219779	F	NoPAS	26.8	-17.9	-3.3	3.3	baculoviral IAP repeat containing 5	61.357	1.7	4.4	4	200.8
ERGIC2	mRNA	51290	NM_016570	chr12	-	29493649	M	AATAAA	58.3	-28	-1.2	3.3	ERGIC and golgi 2	17.958	1.2	0.4	10	15.5
DENR	mRNA	8562	NM_003677	chr12	+	123254038	M	AATAAA	18.9	-14.6	-0.9	3.3	density-regulated protein	27.685	-1.8	-1.6	6	40.4
DENR	mRNA	8562	NM_003677	chr12	+	123255608	L	ATTAAA	10.8	2.2	0	3.3	density-regulated protein	27.685	-1.8	-1.6	6	40.4
CALCOCO1	mRNA	57658	NM_020898	chr12	-	54104942	F	AATAAA	42.9	23.8	0.2	3.3	calcium binding and coiled-coil domain 1	5.238	-1.3	-0.1	3	0.8
VPS33A	mRNA	65082	NM_022916	chr12	-	122716643	F	NoPAS	68.1	-29.8	-3.3	3.3	vacuolar protein sorting 33 homolog A (S. cerevisiae)	107.748	-3.4	-14.3	4	14.3
PRR13	mRNA	54458	NM_018457	chr12	+	53841770	L	AATAAA	33.9	13.8	1.4	3.3	proline rich 13	90.539	-1.2	-0.9	3	15.4
TMTC1	mRNA	83857	NM_175861	chr12	-	29653773	L	ATTAAA	58.6	4.3	0.1	3.3	transmembrane and tetratricopeptide repeat containing 1	21.699	1.1	0.1	5	1.6
LOH12CR1	mRNA	118426	NM_058169	chr12	+	12622631	L	ATTAAA	1.6	7.8	3.3	3.3	loss of heterozygosity, 12, chromosomal region 1	190.805	-2	-11.2	5	11.2
MCFD2	mRNA	90411	NM_001171508	chr2	-	47124050	L	AATAAA	7.3	-3.1	-0.6	3.3	multiple coagulation factor deficiency 2	71.832	2	8.6	3	8.6
COPS8	mRNA	10920	NM_198189	chr2	+	238006679	F	OtherPAS	3.5	20	2.3	3.3	COP9 constitutive photomorphogenic homolog subunit 8 (Arabidopsis)	42.65	-1.9	-2.4	2	5.6
COPS8	mRNA	10920	NM_198189	chr2	+	238007336	L	AATAAA	96.5	-20	-2.3	3.3	COP9 constitutive photomorphogenic homolog subunit 8 (Arabidopsis)	42.65	-1.9	-2.4	2	5.6
RRM2	mRNA	6241	NM_001165931	chr2	+	10269927	M	AATAAA	0	0	NA	3.3	ribonucleotide reductase M2	10.476	3	3.8	6	81.8
WDR33	mRNA	55339	NM_018383	chr2	-	128520687	E	AATAAA	48.3	4.3	0.1	3.3	WD repeat domain 33	43.399	1.2	0.5	5	5.3
MFSD6	mRNA	54842	NM_017694	chr2	+	191366643	F	AATAAA	0	100	3.3	3.3	major facilitator superfamily domain containing 6	15.713	-7.8	-4	3	4
STAM2	mRNA	10254	NM_005843	chr2	-	152974823	M	OtherPAS	59.1	-1.2	0	3.3	signal transducing adaptor molecule (SH3 domain and ITAM motif) 2	32.923	-2.6	-3.4	5	9.8
TMEM198	mRNA	130612	NM_001005209	chr2	+	220415317	F	OtherPAS	100	0	0	3.3	transmembrane protein 198	5.238	-3.9	-1	2	1.4
TMEM198	mRNA	130612	NM_001005209	chr2	+	220424348	L	OtherPAS	0	0	NA	3.3	transmembrane protein 198	5.238	-3.9	-1	2	1.4
CEP57L1	mRNA	285753	NM_001083535	chr6	+	109489303	M	OtherPAS	31.6	1.7	0	3.3	centrosomal protein 57kDa-like 1	14.217	-1.8	-0.8	6	2.4
ZXDC	mRNA	79364	NM_001040653	chr3	-	126177744	F	AATAAA	100	-100	-3.3	3.3	ZXD family zinc finger C	6.734	-2	-0.5	3	3.6
ATP11B	mRNA	23200	NM_014616	chr3	+	182639417	M	AATAAA	14.3	5.7	0	3.3	ATPase, class VI, type 11B	5.238	-1.5	-0.2	4	0.8
C1orf123	mRNA	54987	NM_017887	chr1	-	53679771	L	ATTAAA	3.6	0.6	0	3.3	chromosome 1 open reading frame 123	41.902	1.1	0.3	4	0.5
RWDD3	mRNA	25950	NM_015485	chr1	+	95718345	L	AATAAA	14.3	-1.8	0	3.3	RWD domain containing 3	15.713	-1.5	-0.5	3	3.4
NFASC	mRNA	23114	NM_001005388	chr1	+	204987860	M	ATTAAA	5.9	-3.2	-0.3	3.3	neurofascin	12.72	2	1.7	5	4.4
IRF2BP2	mRNA	359948	NM_182972	chr1	-	234740015	L	AATAAA	77.8	-15.3	-0.2	3.3	interferon regulatory factor 2 binding protein 2	6.734	-1.2	-0.1	4	12.2
ATAD3A	mRNA	55210	NM_018188	chr1	+	1446664	UA	OtherPAS	3.8	2.9	0	3.3	ATPase family, AAA domain containing 3A	19.455	1.6	1.1	3	23.8
UBAP2L	mRNA	9898	NM_014847	chr1	+	154235980	Is	AATAAA	10.5	50.1	3.3	3.3	ubiquitin associated protein 2-like	14.217	1.6	0.9	3	13
ATP2B4	mRNA	493	NM_001001396	chr1	+	203713167	M	AATAAA	42.3	-28.7	-3.3	3.3	ATPase, Ca++ transporting, plasma membrane 4	92.035	-3.1	-11.1	4	11.1
MCL1	mRNA	4170	NM_021960	chr1	-	150547032	M	AATAAA	34.6	21.5	0.9	3.3	myeloid cell leukemia sequence 1 (BCL2-related)	19.455	1.4	0.8	7	8.5
DCLRE1B	mRNA	64858	NM_022836	chr1	+	114455092	M	ATTAAA	92.1	-12.9	-1.3	3.3	DNA cross-link repair 1B	47.14	-1.5	-1.2	3	14.4
RRP15	mRNA	51018	NM_016052	chr1	+	218504620	F	ATTAAA	12.2	-6	-0.3	3.3	ribosomal RNA processing 15 homolog (S. cerevisiae)	30.678	1.1	0.1	4	7.1
MAPK9	mRNA	5601	NM_139068	chr5	-	179680507	Is	AATAAA	9.1	0.9	0	3.3	mitogen-activated protein kinase 9	16.462	-1.2	-0.3	12	2.6
AGXT2L2	mRNA	85007	NM_153373	chr5	-	177630855	L	NoPAS	16.7	83.3	3.3	3.3	alanine-glyoxylate aminotransferase 2-like 2	4.49	2	0.8	6	0.8
TTLL12	mRNA	23170	NM_015140	chr22	-	43560372	L	NoPAS	18.2	11.8	0.2	3.3	tubulin tyrosine ligase-like family, member 12	8.231	2.5	1.9	4	2.5
CREB3L3	mRNA	84699	NM_032607	chr19	+	4182937	L	NoPAS	0	66.7	3.3	3.3	cAMP responsive element binding protein 3-like 3	17.958	-4.4	-3.5	3	3.5
C19orf63	mRNA	284361	NM_175063	chr19	+	50985879	F	NoPAS	0.9	0.7	0.2	3.3	chromosome 19 open reading frame 63	161.623	1	0.2	4	2.8
POLR2E	mRNA	5434	NM_002695	chr19	-	1088163	F	AATAAA	94.3	-2.1	-1.4	3.3	polymerase (RNA) II (DNA directed) polypeptide E, 25kDa	796.89	1.7	40.2	2	94
POLR2E	mRNA	5434	NM_002695	chr19	-	1086598	L	ATTAAA	5.7	2.1	1.4	3.3	polymerase (RNA) II (DNA directed) polypeptide E, 25kDa	796.89	1.7	40.2	2	94
NEAT1	lncRNA	283131	NR_028272	chr11	+	65193887	M	NoPAS	9.4	8.6	1.5	3.3	nuclear paraspeckle assembly transcript 1 (non-protein coding)	118.972	1	0.1	7	15.4
LOC100506783	lncRNA	100506783	NR_038435	chr2	-	176999574	F	AATAAA	88	4.5	0.2	3.3	uncharacterized LOC100506783	18.706	1.4	0.8	4	4.8
RPL32P3	lncRNA	132241	NR_003111	chr3	-	129091825	L	NoPAS	0	0	NA	3.3	ribosomal protein L32 pseudogene 3	29.93	-1	0	4	8.9
LOC100287616	lncRNA	100287616	NR_040066	chr15	-	74209941	M	ATTAAA	0	20	0.6	3.3	uncharacterized LOC100287616	8.979	1.1	0.1	9	2
CSTF1	mRNA	1477	NM_001324	chr20	+	54979105	M	ATTAAA	20	12.4	0.3	3.2	cleavage stimulation factor, 3' pre-RNA, subunit 1, 50kDa	11.224	2	1.7	4	15.2
UBE2V1	mRNA	7335	NM_021988	chr20	-	48711368	Is	OtherPAS	51.7	-28.6	-3.2	3.2	ubiquitin-conjugating enzyme E2 variant 1	44.895	1.2	0.4	8	3.4
RBM12	mRNA	10137	NM_006047	chr20	-	34239945	M	AATAAA	40	1.2	0	3.2	RNA binding motif protein 12	11.224	1	0	7	4.8
C20orf132	mRNA	140699	NM_152503	chr20	-	35729629	E	AATAAA	100	-100	-0.6	3.2	chromosome 20 open reading frame 132	2.245	-3.3	-0.4	3	0.5
NKRF	mRNA	55922	NM_001173488	chrX	-	118722300	L	AATAAA	4.3	9	0.7	3.2	NFKB repressing factor	35.168	-1.7	-1.7	4	2.7
CTSB	mRNA	1508	NM_147780	chr8	-	11700033	L	AATAAA	17.8	3.8	1.2	3.2	cathepsin B	514.05	1.1	2.2	3	999
PHF20L1	mRNA	51105	NM_016018	chr8	+	133824561	Ic	AATAAA	6.8	-6.8	-0.3	3.2	PHD finger protein 20-like 1	32.923	-2.7	-3.5	10	3.5
HAS2	mRNA	3037	NM_005328	chr8	-	122624356	L	AATAAA	NA	NA	NA	3.2	hyaluronan synthase 2	0	999	0	4	7.3
VDAC3	mRNA	7419	NM_001135694	chr8	+	42263415	M	AATAAA	75	13.2	0.4	3.2	voltage-dependent anion channel 3	11.972	-1	0	4	52.8
TMEM68	mRNA	137695	NM_152417	chr8	-	56674763	Ic	ATTAAA	0	0	NA	3.2	transmembrane protein 68	5.238	-3.9	-1	5	1
SGCB	mRNA	6443	NM_000232	chr4	-	52890100	F	ATTAAA	37	-3.7	-0.1	3.2	sarcoglycan, beta (43kDa dystrophin-associated glycoprotein)	20.203	1	0	8	0.5
MTHFD2L	mRNA	441024	NM_001144978	chr4	+	75167040	Is	AATAAA	0	0	NA	3.2	methylenetetrahydrofolate dehydrogenase (NADP+ dependent) 2-like	14.217	-1.8	-0.8	10	2.7
CCNA2	mRNA	890	NM_001237	chr4	-	122738525	M	AATAAA	57.1	-43.9	-3.2	3.2	cyclin A2	15.713	1.6	1.2	9	61.6
DCUN1D2	mRNA	55208	NM_001014283	chr13	-	114110424	F	AATAAA	15	15.4	1	3.2	DCN1, defective in cullin neddylation 1, domain containing 2 (S. cerevisiae)	29.93	1.3	0.6	3	1.8
GSPT1	mRNA	2935	NM_001130007	chr16	-	11963995	M	OtherPAS	48.4	-29.9	-3.2	3.2	G1 to S phase transition 1	46.392	-1.1	-0.1	5	18.4
USP7	mRNA	7874	NM_003470	chr16	-	8985954	L	ATTAAA	2.8	-0.7	0	3.2	ubiquitin specific peptidase 7 (herpes virus-associated)	26.937	1.2	0.3	9	0.8
GSTO2	mRNA	119391	NM_183239	chr10	+	106029670	Ic	AATAAA	0	100	3.2	3.2	glutathione S-transferase omega 2	5.238	-1.3	-0.1	4	0.4
GSTO2	mRNA	119391	NM_183239	chr10	+	106059176	S	AATAAA	100	-100	-3.2	3.2	glutathione S-transferase omega 2	5.238	-1.3	-0.1	4	0.4
PITRM1	mRNA	10531	NM_001242307	chr10	-	3179920	S	AATAAA	32.4	-24.5	-2.8	3.2	pitrilysin metallopeptidase 1	27.685	2.2	4.3	4	6.2
LHPP	mRNA	64077	NM_022126	chr10	+	126187084	Is	AATAAA	0	100	0.6	3.2	phospholysine phosphohistidine inorganic pyrophosphate phosphatase	2.245	-3.3	-0.4	4	3.5
PDCL	mRNA	5082	NM_005388	chr9	-	125580623	L	AATAAA	85.7	3.8	0.1	3.2	phosducin-like	26.189	-1	0	3	0.3
ERP44	mRNA	23071	NM_015051	chr9	-	102744420	M	AATAAA	67.9	-35.3	-3.2	3.2	endoplasmic reticulum protein 44	41.902	-1.4	-1.1	5	6.1
ERP44	mRNA	23071	NM_015051	chr9	-	102743596	M	AATAAA	0	0	NA	3.2	endoplasmic reticulum protein 44	41.902	-1.4	-1.1	5	6.1
CNTRL	mRNA	11064	NM_007018	chr9	+	123939888	S	AATAAA	42.9	-22.9	-0.2	3.2	centriolin	5.238	-1.5	-0.2	4	7.9
SHB	mRNA	6461	NM_003028	chr9	-	37919547	F	ATTAAA	2.4	2	0.2	3.2	Src homology 2 domain containing adaptor protein B	62.853	-1	0	2	1.7
SHB	mRNA	6461	NM_003028	chr9	-	37919129	L	AATAAA	97.6	-2	-0.2	3.2	Src homology 2 domain containing adaptor protein B	62.853	-1	0	2	1.7
DENND4C	mRNA	55667	NM_017925	chr9	+	19373035	F	AATAAA	0	0	NA	3.2	DENN/MADD domain containing 4C	5.986	-2.2	-0.6	6	2.9
BCAP29	mRNA	55973	NM_018844	chr7	+	107262315	M	AATAAA	65	-5.4	-0.4	3.2	B-cell receptor-associated protein 29	102.511	1.1	0.3	3	30.3
TAX1BP1	mRNA	8887	NM_006024	chr7	+	27868650	F	AATAAA	67.3	-21.8	-3.2	3.2	Tax1 (human T-cell leukemia virus type I) binding protein 1	112.238	-1.6	-4	4	4
CDK6	mRNA	1021	NM_001145306	chr7	-	92354889	Ic	ATTAAA	71.4	13.9	0.4	3.2	cyclin-dependent kinase 6	10.476	2.2	1.9	3	1.9
CHCHD3	mRNA	54927	NM_017812	chr7	-	132752107	Ic	ATTAAA	61.5	-10.3	-0.5	3.2	coiled-coil-helix-coiled-coil-helix domain containing 3	29.182	1.9	2.9	7	4.8
AKR1B15	mRNA	441282	NM_001080538	chr7	+	134242603	Ic	AATAAA	60	-60	0	3.2	aldo-keto reductase family 1, member B15	3.741	-5.5	-1	5	24.9
CD44	mRNA	960	NM_000610	chr11	+	35251015	F	OtherPAS	11.6	-1	-0.3	3.2	CD44 molecule (Indian blood group)	990.687	-2	-51	3	51
FNBP4	mRNA	23360	NM_015308	chr11	-	47738075	L	AATAAA	46.9	47.5	3.2	3.2	formin binding protein 4	23.944	-2	-1.6	3	1.6
CHEK1	mRNA	1111	NM_001114122	chr11	+	125495032	UA	AATAAA	0	0	NA	3.2	checkpoint kinase 1	2.245	-3.3	-0.4	4	2.9
RCN1	mRNA	5954	NM_002901	chr11	+	32126320	F	ATTAAA	13.8	-13.8	-1.3	3.2	reticulocalbin 1, EF-hand calcium binding domain	21.699	-1	0	5	18.4
ENDOV	mRNA	284131	NM_173627	chr17	+	78411886	L	AATAAA	0	0	NA	3.2	endonuclease V	50.133	1.2	0.5	6	0.9
DNAL1	mRNA	83544	NM_001201366	chr14	+	74142758	Ic	AATAAA	0	0	NA	3.2	dynein, axonemal, light chain 1	29.182	-1.4	-0.8	7	5.5
FAM177A1	mRNA	283635	NM_001079519	chr14	+	35552584	L	OtherPAS	42.9	3.3	0	3.2	family with sequence similarity 177, member A1	10.476	-1.2	-0.2	4	0.4
PPM1A	mRNA	5494	NM_021003	chr14	+	60765805	L	AATAAA	63.6	-11	-0.1	3.2	protein phosphatase, Mg2+/Mn2+ dependent, 1A	8.231	1.6	0.6	5	1.4
STXBP6	mRNA	29091	NM_014178	chr14	-	25278865	L	ATTAAA	0	12.5	0.6	3.2	syntaxin binding protein 6 (amisyn)	18.706	-3.5	-2.9	4	2.9
TMEM116	mRNA	89894	NM_001193531	chr12	-	112448229	Ic	AATAAA	42.9	-42.9	-1.5	3.2	transmembrane protein 116	5.238	1.7	0.4	3	2.2
TMEM116	mRNA	89894	NM_001193531	chr12	-	112369102	S	AATAAA	42.9	57.1	2.1	3.2	transmembrane protein 116	5.238	1.7	0.4	3	2.2
PRPF40B	mRNA	25766	NM_012272	chr12	+	50028604	Ic	AATAAA	20	5	0	3.2	PRP40 pre-mRNA processing factor 40 homolog B (S. cerevisiae)	3.741	-1.4	-0.1	3	2.8
CNOT2	mRNA	4848	NM_001199303	chr12	+	70636269	UA	ATTAAA	31.2	21.9	0.7	3.2	CCR4-NOT transcription complex, subunit 2	11.972	1.8	1.2	5	17.8
PLBD2	mRNA	196463	NM_173542	chr12	+	113829371	M	AATAAA	34.8	-1.5	-0.1	3.2	phospholipase B domain containing 2	86.049	1.5	2.8	3	38.4
ORMDL2	mRNA	29095	NM_014182	chr12	+	56217336	M	NoPAS	0	1	0	3.2	ORM1-like 2 (S. cerevisiae)	38.909	1.7	2.6	6	3.7
RPE	mRNA	6120	NM_199229	chr2	+	210886984	M	AATAAA	89.2	-17	-0.9	3.2	ribulose-5-phosphate-3-epimerase	27.685	-2.3	-2.4	5	2.8
PPP1CB	mRNA	5500	NM_002709	chr2	+	29025806	L	ATTAAA	26.9	-3.8	0	3.2	protein phosphatase 1, catalytic subunit, beta isozyme	19.455	-2.2	-1.6	5	4.1
TEX261	mRNA	113419	NM_144582	chr2	-	71213072	M	AATAAA	81.8	1.5	0	3.2	testis expressed 261	8.231	-1	0	3	15.1
C2orf68	mRNA	388969	NM_001013649	chr2	-	85835410	F	AATAAA	17.6	-1.9	0	3.2	chromosome 2 open reading frame 68	25.441	1.4	0.7	4	2.8
KYNU	mRNA	8942	NM_001199241	chr2	+	143813402	L	AATAAA	0	25	3.2	3.2	kynureninase	46.392	-3.4	-6.5	8	27.7
GLS	mRNA	2744	NM_014905	chr2	+	191800015	Is	AATAAA	12	-12	-0.8	3.2	glutaminase	37.413	-2.6	-3.9	13	3.9
TMEM185B	mRNA	79134	NM_024121	chr2	-	120977908	M	AATAAA	2.1	3.6	0.9	3.2	transmembrane protein 185B	108.497	1.6	5.8	5	5.8
SRSF3	mRNA	6428	NM_003017	chr6	+	36570561	M	ATTAAA	42.2	14.6	1.1	3.2	serine/arginine-rich splicing factor 3	47.888	1.6	2.4	4	66.3
KIF13A	mRNA	63971	NM_001105568	chr6	-	17815157	Is	NoPAS	0	0	NA	3.2	kinesin family member 13A	8.231	1.3	0.2	10	3.8
WDR27	mRNA	253769	NM_182552	chr6	-	169958423	Ic	ATTAAA	3	-0.3	0	3.2	WD repeat domain 27	100.266	-4	-15.8	6	52.2
SSR1	mRNA	6745	NM_003144	chr6	-	7289862	F	ATTAAA	14	-10.1	-3.2	3.2	signal sequence receptor, alpha	85.301	2.6	20.2	4	27.6
COX7A2	mRNA	1347	NM_001865	chr6	-	75950901	S	AATAAA	13.3	-11.6	-3.2	3.2	cytochrome c oxidase subunit VIIa polypeptide 2 (liver)	95.776	-1.2	-0.9	2	16.2
COX7A2	mRNA	1347	NM_001865	chr6	-	75947505	S	AATAAA	86.7	11.6	3.2	3.2	cytochrome c oxidase subunit VIIa polypeptide 2 (liver)	95.776	-1.2	-0.9	2	16.2
BTN2A1	mRNA	11120	NM_078476	chr6	+	26474669	L	ATTAAA	53.3	-48	-3.2	3.2	butyrophilin, subfamily 2, member A1	22.448	-1.7	-1.2	3	1.2
ASCC3	mRNA	10973	NM_006828	chr6	-	100956610	S	AATAAA	97.7	-8.2	-0.7	3.2	activating signal cointegrator 1 complex subunit 3	32.923	-2.6	-3.4	3	3.4
SLC22A23	mRNA	63027	NM_015482	chr6	-	3387701	Ic	ATTAAA	0	0	NA	3.2	solute carrier family 22, member 23	10.476	1.4	0.5	7	2.1
ACPL2	mRNA	92370	NM_152282	chr3	+	141013475	M	AATAAA	13	-13	-1	3.2	acid phosphatase-like 2	17.21	1	0	6	10.7
HEG1	mRNA	57493	NM_020733	chr3	-	124687881	M	OtherPAS	12.3	-11.4	-3.2	3.2	HEG homolog 1 (zebrafish)	79.315	-1.1	-0.2	3	20.6
CCDC71	mRNA	64925	NM_022903	chr3	-	49199968	F	NoPAS	36	20.8	0.9	3.2	coiled-coil domain containing 71	18.706	1.3	0.5	4	3.1
YEATS2	mRNA	55689	NM_018023	chr3	+	183511278	Is	AATAAA	0	20	0	3.2	YEATS domain containing 2	1.497	2.3	0.3	4	1.6
TIMP4	mRNA	7079	NM_003256	chr3	-	12190147	L	AATAAA	27.7	25.5	3.2	3.2	TIMP metallopeptidase inhibitor 4	75.574	-1.4	-1.7	3	11.2
ANKRD13C	mRNA	81573	NM_030816	chr1	-	70726271	F	AATAAA	17.4	25.9	3.2	3.2	ankyrin repeat domain 13C	64.35	-1.4	-1.5	3	1.5
CMPK1	mRNA	51727	NM_016308	chr1	+	47844507	L	AATAAA	79.5	-0.3	0	3.2	cytidine monophosphate (UMP-CMP) kinase 1, cytosolic	58.364	1.1	0.3	3	5.8
DCAF6	mRNA	55827	NM_001198956	chr1	+	168045025	M	AATAAA	37.5	18.9	0.8	3.2	DDB1 and CUL4 associated factor 6	17.958	2.9	6.1	3	6.1
DCAF6	mRNA	55827	NM_001198956	chr1	+	168045070	L	ATTAAA	54.2	-13.2	-0.5	3.2	DDB1 and CUL4 associated factor 6	17.958	2.9	6.1	3	6.1
IPO9	mRNA	55705	NM_018085	chr1	+	201852906	M	AATAAA	7.9	1.2	0	3.2	importin 9	28.434	-1.3	-0.5	5	3.8
PTGS2	mRNA	5743	NM_000963	chr1	-	186640965	L	AATAAA	33.3	41.7	0.6	3.2	prostaglandin-endoperoxide synthase 2 (prostaglandin G/H synthase and cyclooxygenase)	8.979	-3.3	-1.4	8	59.5
EPHB2	mRNA	2048	NM_004442	chr1	+	23241166	M	OtherPAS	77.6	-3.6	-0.2	3.2	EPH receptor B2	56.867	-1.2	-0.4	5	2.2
SRGAP2	mRNA	23380	NM_015326	chr1	+	206629505	Ic	AATAAA	34.8	-34.8	-3.2	3.2	SLIT-ROBO Rho GTPase activating protein 2	17.21	1.1	0.2	5	0.8
MAN1A2	mRNA	10905	NM_006699	chr1	+	118067974	M	ATTAAA	51.9	-1.9	0	3.2	mannosidase, alpha, class 1A, member 2	20.203	1.8	1.9	6	1.9
S100PBP	mRNA	64766	NM_022753	chr1	+	33321787	F	OtherPAS	25	28.8	0.8	3.2	S100P binding protein	11.972	-1.4	-0.3	5	2.9
LARS	mRNA	51520	NM_020117	chr5	-	145493474	M	AATAAA	56.6	4.1	0.2	3.2	leucyl-tRNA synthetase	91.287	-1.5	-2.5	3	9
HMGCR	mRNA	3156	NM_000859	chr5	+	74657248	M	AATAAA	2.2	-2.2	-1.2	3.2	3-hydroxy-3-methylglutaryl-CoA reductase	173.595	-1.3	-2.5	5	5.6
FAT2	mRNA	2196	NM_001447	chr5	-	150883653	S	AATAAA	100	0	0	3.2	FAT tumor suppressor homolog 2 (Drosophila)	0.748	1.8	0	3	25.6
PDIA3	mRNA	2923	NM_005313	chr15	+	44063738	M	AATAAA	94.8	-0.3	0	3.2	protein disulfide isomerase family A, member 3	128.7	1.4	3.8	4	8.3
ZSCAN2	mRNA	54993	NM_181877	chr15	+	85166947	S	AATAAA	0	33.3	0.5	3.2	zinc finger and SCAN domain containing 2	5.238	-2.6	-0.7	4	0.7
DTWD1	mRNA	56986	NM_020234	chr15	+	49948429	L	AATAAA	11.1	-11.1	-0.3	3.2	DTW domain containing 1	6.734	1	0	6	10.3
MFAP1	mRNA	4236	NM_005926	chr15	-	44093469	L	OtherPAS	1.6	-0.7	0	3.2	microfibrillar-associated protein 1	47.14	1.6	2.3	4	6.6
XPNPEP3	mRNA	63929	NM_022098	chr22	+	41257830	Is	OtherPAS	4.3	42.4	3.2	3.2	X-prolyl aminopeptidase (aminopeptidase P) 3, putative	17.21	1.2	0.2	6	1.2
C19orf2	mRNA	8725	NM_003796	chr19	+	30507515	L	ATTAAA	6.4	35.3	3.2	3.2	URI1, prefoldin-like chaperone	35.168	-2.2	-2.7	5	2.7
FZR1	mRNA	51343	NM_016263	chr19	+	3536748	M	ATTAAA	42.3	-2.9	0	3.2	fizzy/cell division cycle 20 related 1 (Drosophila)	19.455	1.1	0.2	5	6.3
MPND	mRNA	84954	NM_032868	chr19	+	4354574	Ic	AATAAA	15.8	43.3	2	3.2	MPN domain containing	14.217	1	0	3	1.6
LOC100129387	lncRNA	100129387	NR_024490	chr15	+	50648527	S	AATAAA	0	0	NA	3.2	uncharacterized LOC100129387	8.231	-4.1	-1.5	3	4
RP11-453E17.1	lncRNA	NA	ENST00000500538	chr4	+	68595916	Ic	ATTAAA	12.5	57.5	2.3	3.2		5.986	3.4	3	7	3
SNX21	mRNA	90203	NM_001042633	chr20	+	44477865	L	OtherPAS	0	5.8	1.4	3.1	sorting nexin family member 21	56.119	1.3	0.8	5	12.8
DSTN	mRNA	11034	NM_001011546	chr20	+	17588573	M	OtherPAS	2.3	14.5	3.1	3.1	destrin (actin depolymerizing factor)	65.846	1.2	0.5	6	4.5
C20orf112	mRNA	140688	NM_080616	chr20	-	31034930	F	NoPAS	6.7	-6.7	0	3.1	chromosome 20 open reading frame 112	11.224	-1.5	-0.5	5	1.5
IDS	mRNA	3423	NM_000202	chrX	-	148564072	F	ATTAAA	11.2	-7.5	-1.5	3.1	iduronate 2-sulfatase	66.595	1.4	1.7	5	26.3
CLCN4	mRNA	1183	NM_001830	chrX	+	10202819	M	ATTAAA	92.3	-36.9	-3.1	3.1	chloride channel 4	19.455	1.9	2.3	5	2.3
MYL12B	mRNA	103910	NM_001144944	chr18	+	3278186	F	AATAAA	80.6	11.2	3.1	3.1	myosin, light chain 12B, regulatory	169.853	-1.2	-1.3	2	60
MYL12B	mRNA	103910	NM_001144944	chr18	+	3278255	L	AATAAA	19.4	-11.2	-3.1	3.1	myosin, light chain 12B, regulatory	169.853	-1.2	-1.3	2	60
ATP6V1C1	mRNA	528	NM_001695	chr8	+	104081511	M	AATAAA	17.7	-1.3	0	3.1	ATPase, H+ transporting, lysosomal 42kDa, V1 subunit C1	71.832	-1.5	-1.8	5	14.8
SORBS3	mRNA	10174	NM_005775	chr8	+	22430851	Ic	AATAAA	33.3	27.8	0.6	3.1	sorbin and SH3 domain containing 3	6.734	1.8	0.8	3	4.3
SORBS3	mRNA	10174	NM_005775	chr8	+	22433008	S	AATAAA	55.6	-22.3	-0.4	3.1	sorbin and SH3 domain containing 3	6.734	1.8	0.8	3	4.3
RAB2A	mRNA	5862	NM_002865	chr8	+	61535655	M	AATAAA	11.3	3.6	0.4	3.1	RAB2A, member RAS oncogene family	105.504	1.5	4	4	12.1
PHF20L1	mRNA	51105	NM_016018	chr8	+	133861052	L	AATAAA	27.3	6	0.1	3.1	PHD finger protein 20-like 1	32.923	-2.7	-3.5	10	3.5
GSR	mRNA	2936	NM_000637	chr8	-	30535578	M	AATAAA	44.4	-3.5	0	3.1	glutathione reductase	6.734	2.2	1.3	5	3.1
TNFRSF10C	mRNA	8794	NM_003841	chr8	+	22961071	Ic	AATAAA	20	80	0.5	3.1	tumor necrosis factor receptor superfamily, member 10c, decoy without an intracellular domain	3.741	-5.5	-1	4	1
PDS5A	mRNA	23244	NM_001100399	chr4	-	39826422	F	ATTAAA	17.8	-13.3	-3.1	3.1	PDS5, regulator of cohesion maintenance, homolog A (S. cerevisiae)	101.014	-1.1	-0.4	7	0.9
PLA2G12A	mRNA	81579	NM_030821	chr4	-	110635073	M	OtherPAS	12.5	-5.4	0	3.1	phospholipase A2, group XIIA	17.958	-1.9	-1.1	8	12.2
METAP1	mRNA	23173	NM_015143	chr4	+	99983960	M	ATTAAA	69.6	-19.6	-0.6	3.1	methionyl aminopeptidase 1	17.21	-1.3	-0.4	5	7.6
TMCO3	mRNA	55002	NM_017905	chr13	+	114189601	Ic	AATAAA	17.4	-11.5	-0.4	3.1	transmembrane and coiled-coil domains 3	17.21	-1.5	-0.7	10	0.7
BORA	mRNA	79866	NM_024808	chr13	+	73321355	Ic	ATTAAA	100	-100	-3.1	3.1	bora, aurora kinase A activator	2.993	2.5	0.9	3	12.8
GPC6	mRNA	10082	NM_005708	chr13	+	94989241	Ic	AATAAA	0	35.3	3.1	3.1	glypican 6	24.692	-2.1	-2	11	7
KAT8	mRNA	84148	NM_182958	chr16	+	31135385	Ic	AATAAA	48.1	-4.6	-0.2	3.1	K(lysine) acetyltransferase 8	57.615	-1.2	-0.7	5	1.5
RNF40	mRNA	9810	NM_014771	chr16	+	30788051	L	AATAAA	0	0.3	0	3.1	ring finger protein 40	127.951	1.6	5.8	4	8.7
CSTF2T	mRNA	23283	NM_015235	chr10	-	53449053	L	AATAAA	0	0	NA	3.1	cleavage stimulation factor, 3' pre-RNA, subunit 2, 64kDa, tau variant	1.497	-2.2	-0.2	7	1.7
ANXA11	mRNA	311	NM_145869	chr10	-	81916751	Ic	NoPAS	20.5	-15.1	-1.2	3.1	annexin A11	32.923	-1.3	-0.6	5	26.9
GLRX3	mRNA	10539	NM_001199868	chr10	+	131978646	F	AATAAA	98.8	0.4	0.2	3.1	glutaredoxin 3	239.441	-1.4	-3.8	3	27
PSMD5	mRNA	5711	NM_005047	chr9	-	123593946	Ic	AATAAA	0	41.2	3.1	3.1	proteasome (prosome, macropain) 26S subunit, non-ATPase, 5	17.958	-1.6	-0.8	3	1.1
FUBP3	mRNA	8939	NM_003934	chr9	+	133513084	F	OtherPAS	33.3	-21.5	-0.7	3.1	far upstream element (FUSE) binding protein 3	11.224	1	0	3	2.5
TRIM4	mRNA	89122	NM_033017	chr7	-	99498142	Is	AATAAA	90.9	-12.3	-0.2	3.1	tripartite motif containing 4	8.231	1.1	0.1	11	1.5
HGF	mRNA	3082	NM_000601	chr7	-	81401704	UA	AATAAA	0	0	NA	3.1	hepatocyte growth factor (hepapoietin A; scatter factor)	4.49	1.8	0.6	11	0.6
TBXAS1	mRNA	6916	NM_001130966	chr7	+	139497285	Is	ATTAAA	80	8.9	0.3	3.1	thromboxane A synthase 1 (platelet)	3.741	3.3	1.7	5	2.5
TBXAS1	mRNA	6916	NM_001130966	chr7	+	139720093	S	AATAAA	0	0	NA	3.1	thromboxane A synthase 1 (platelet)	3.741	3.3	1.7	5	2.5
VKORC1L1	mRNA	154807	NM_173517	chr7	+	65423535	M	AATAAA	0	1	0	3.1	vitamin K epoxide reductase complex, subunit 1-like 1	44.895	1.6	2.1	5	4.3
C7orf73	mRNA	647087	NM_001130929	chr7	+	135359918	M	ATTAAA	7.1	7.5	3.1	3.1	chromosome 7 open reading frame 73	252.91	1.3	4.4	4	9
NDUFC2	mRNA	4718	NM_004549	chr11	-	77780901	F	ATTAAA	25	10.3	0	3.1	NADH dehydrogenase (ubiquinone) 1, subcomplex unknown, 2, 14.5kDa	5.986	1.9	0.8	4	11.5
TIMM8B	mRNA	26521	NM_012459	chr11	-	111955873	F	OtherPAS	100	-5.9	0	3.1	translocase of inner mitochondrial membrane 8 homolog B (yeast)	5.986	1.9	0.8	2	2.5
TIMM8B	mRNA	26521	NM_012459	chr11	-	111953454	L	AATAAA	0	5.9	0	3.1	translocase of inner mitochondrial membrane 8 homolog B (yeast)	5.986	1.9	0.8	2	2.5
PHF21A	mRNA	51317	NM_001101802	chr11	-	45950875	L	AATAAA	0	0	NA	3.1	PHD finger protein 21A	8.231	-1.2	-0.2	5	8
MED17	mRNA	9440	NM_004268	chr11	+	93546454	M	AATAAA	0	0	NA	3.1	mediator complex subunit 17	8.979	1.7	0.8	3	1.1
NBR1	mRNA	4077	NM_031858	chr17	+	41363490	M	AATAAA	21.8	15.2	0.9	3.1	neighbor of BRCA1 gene 1	41.154	-1.3	-0.8	4	0.9
SKA2	mRNA	348235	NM_182620	chr17	-	57188618	M	AATAAA	12.3	-10.7	-2.7	3.1	spindle and kinetochore associated complex subunit 2	54.622	1.6	2.8	8	16.9
SARM1	mRNA	23098	NM_015077	chr17	+	26725180	F	OtherPAS	100	-25	-0.3	3.1	sterile alpha and TIR motif containing 1	2.993	1.8	0.4	5	0.9
CCDC103	mRNA	388389	NM_213607	chr17	+	42981047	M	AATAAA	11.2	-7.7	-3.1	3.1	coiled-coil domain containing 103	173.595	1.1	0.7	3	11
FASN	mRNA	2194	NM_004104	chr17	-	80036337	F	Arich	0	50	0.4	3.1	fatty acid synthase	2.245	-1.7	-0.2	2	9.1
FASN	mRNA	2194	NM_004104	chr17	-	80036214	L	ATTAAA	100	-50	-0.4	3.1	fatty acid synthase	2.245	-1.7	-0.2	2	9.1
TRAF3	mRNA	7187	NM_145725	chr14	+	103377832	L	AATAAA	76.2	-3	-0.2	3.1	TNF receptor-associated factor 3	47.14	1.2	0.4	3	13.6
MAPK1IP1L	mRNA	93487	NM_144578	chr14	+	55531550	F	OtherPAS	3.3	-3.3	-0.3	3.1	mitogen-activated protein kinase 1 interacting protein 1-like	68.091	-2.8	-7.3	8	7.3
DCAF5	mRNA	8816	NM_003861	chr14	-	69520454	F	ATTAAA	86.2	-0.3	0	3.1	DDB1 and CUL4 associated factor 5	43.399	1.1	0.2	3	1.2
TFCP2	mRNA	7024	NM_005653	chr12	-	51488620	M	OtherPAS	79	5.1	0.3	3.1	transcription factor CP2	78.567	-1.8	-4	4	12.9
HMGA2	mRNA	8091	NM_003483	chr12	+	66360071	L	AATAAA	4.3	6.6	1.5	3.1	high mobility group AT-hook 2	121.217	1.1	0.2	5	99.3
TMCC3	mRNA	57458	NM_020698	chr12	-	95042337	Ic	ATTAAA	0	14.7	0.8	3.1	transmembrane and coiled-coil domain family 3	13.469	1.7	1.1	4	2
BRAP	mRNA	8315	NM_006768	chr12	-	112081890	F	NoPAS	99.2	-5.2	-3.1	3.1	BRCA1 associated protein	290.322	-2.9	-30.4	2	30.4
BRAP	mRNA	8315	NM_006768	chr12	-	112079950	L	ATTAAA	0.8	5.2	3.1	3.1	BRCA1 associated protein	290.322	-2.9	-30.4	2	30.4
TFPI	mRNA	7035	NM_006287	chr2	-	188328957	M	OtherPAS	34.1	24.5	1.3	3.1	tissue factor pathway inhibitor (lipoprotein-associated coagulation inhibitor)	30.678	-1.6	-1.1	7	22.1
MBD5	mRNA	55777	NM_018328	chr2	+	149271036	S	AATAAA	85.7	-6.8	0	3.1	methyl-CpG binding domain protein 5	5.238	2.5	1.3	6	5.6
ERLEC1	mRNA	27248	NM_015701	chr2	+	54045289	M	OtherPAS	49.2	-32.9	-3.1	3.1	endoplasmic reticulum lectin 1	44.147	-1.5	-1.4	7	2.1
EFHC1	mRNA	114327	NM_018100	chr6	+	52357439	M	AATAAA	27.8	-25.7	-2.3	3.1	EF-hand domain (C-terminal) containing 1	13.469	2.4	2.8	8	2.8
DSE	mRNA	29940	NM_013352	chr6	+	116721590	Ic	AATAAA	32.3	-9.4	-0.4	3.1	dermatan sulfate epimerase	46.392	-2	-2.8	10	2.8
RARS2	mRNA	57038	NM_020320	chr6	-	88229258	Ic	ATTAAA	10	23.3	0.9	3.1	arginyl-tRNA synthetase 2, mitochondrial	14.965	-1.2	-0.2	6	1.6
REPS1	mRNA	85021	NM_031922	chr6	-	139226074	F	ATTAAA	0	6.3	0.5	3.1	RALBP1 associated Eps domain containing 1	24.692	1.7	2	3	6.2
ARHGAP18	mRNA	93663	NM_033515	chr6	-	129994063	Ic	AATAAA	0	17.9	3.1	3.1	Rho GTPase activating protein 18	38.909	1.4	1	4	38.3
ARHGAP18	mRNA	93663	NM_033515	chr6	-	129898243	M	ATTAAA	96.2	-21.8	-3.1	3.1	Rho GTPase activating protein 18	38.909	1.4	1	4	38.3
HLA-DPA1	mRNA	3113	NM_001242524	chr6	-	33035437	Ic	ATTAAA	5.3	1.4	0	3.1	major histocompatibility complex, class II, DP alpha 1	42.65	-1.4	-1	2	245.2
HLA-DPA1	mRNA	3113	NM_001242524	chr6	-	33032793	S	AATAAA	94.7	-1.4	0	3.1	major histocompatibility complex, class II, DP alpha 1	42.65	-1.4	-1	2	245.2
STX7	mRNA	8417	NM_003569	chr6	-	132775119	L	AATAAA	4.2	6.3	0.2	3.1	syntaxin 7	17.958	-1.4	-0.5	7	1.7
C6orf35	mRNA	729515	NM_018452	chr6	-	157710418	L	ATTAAA	0	2	0.4	3.1	transmembrane protein 242	45.643	-1.4	-1	3	1
SERPINB1	mRNA	1992	NM_030666	chr6	-	2832566	L	AATAAA	66.7	23.7	3.1	3.1	serpin peptidase inhibitor, clade B (ovalbumin), member 1	42.65	1.3	0.9	3	18
PDCD6IP	mRNA	10015	NM_001162429	chr3	+	33911195	L	AATAAA	45.6	27.4	3.1	3.1	programmed cell death 6 interacting protein	67.343	-1.6	-2.2	3	2.2
SLC33A1	mRNA	9197	NM_004733	chr3	-	155538813	L	AATAAA	0	33.3	0.4	3.1	solute carrier family 33 (acetyl-CoA transporter), member 1	3.741	-1.8	-0.3	6	3.2
DPH3	mRNA	285381	NM_206831	chr3	-	16301843	M	ATTAAA	9.5	-4.5	0	3.1	DPH3, KTI11 homolog (S. cerevisiae)	15.713	-1.2	-0.2	6	20.9
CTDSPL	mRNA	10217	NM_001008392	chr3	+	38025960	L	AATAAA	58.3	-51.6	-3.1	3.1	CTD (carboxy-terminal domain, RNA polymerase II, polypeptide A) small phosphatase-like	8.979	2.3	1.7	4	6.4
CCDC71	mRNA	64925	NM_022903	chr3	-	49203100	Ic	AATAAA	52	-16.9	-0.7	3.1	coiled-coil domain containing 71	18.706	1.3	0.5	4	3.1
GNG12	mRNA	55970	NM_018841	chr1	-	68170406	F	AATAAA	15.9	-13.5	-3.1	3.1	guanine nucleotide binding protein (G protein), gamma 12	61.357	1.4	1.4	3	10.4
PEX19	mRNA	5824	NM_002857	chr1	-	160246597	M	OtherPAS	0	6.4	3.1	3.1	peroxisomal biogenesis factor 19	113.734	1.1	0.4	5	1.9
DFFA	mRNA	1676	NM_213566	chr1	-	10518531	M	ATTAAA	3.4	-3.4	-0.3	3.1	DNA fragmentation factor, 45kDa, alpha polypeptide	21.699	-1	0	9	1.6
IPO13	mRNA	9670	NM_014652	chr1	+	44433694	L	ATTAAA	20.4	14.7	3.1	3.1	importin 13	121.217	1.9	10.4	4	10.4
CEP104	mRNA	9731	NM_014704	chr1	-	3728650	L	AATAAA	0	25	0.7	3.1	centrosomal protein 104kDa	6.734	-1.2	-0.1	8	1.8
SLC30A1	mRNA	7779	NM_021194	chr1	-	211753597	UA	OtherPAS	16.7	34.5	2.5	3.1	solute carrier family 30 (zinc transporter), member 1	22.448	1.3	0.5	7	8.1
PRELID1	mRNA	27166	NM_013237	chr5	+	176733668	F	ATTAAA	23.8	-16.3	-1	3.1	PRELI domain containing 1	15.713	1.7	1.3	2	18.9
PRELID1	mRNA	27166	NM_013237	chr5	+	176733950	L	AATAAA	76.2	16.3	1	3.1	PRELI domain containing 1	15.713	1.7	1.3	2	18.9
CAST	mRNA	831	NM_001042440	chr5	+	96110387	L	ATTAAA	16.5	7.4	0.7	3.1	calpastatin	90.539	-1.5	-2.5	6	28.9
SPEF2	mRNA	79925	NM_024867	chr5	+	35671678	Ic	ATTAAA	0	NA	NA	3.1	sperm flagellar 2	0.748	-999	-0.3	3	1
SKP1	mRNA	6500	NM_006930	chr5	-	133493173	F	AATAAA	77.3	1.9	0.1	3.1	S-phase kinase-associated protein 1	65.846	-1.4	-1.2	4	138.3
C15orf40	mRNA	123207	NM_144597	chr15	-	83670103	M	AATAAA	83.3	-37.8	-0.5	3.1	chromosome 15 open reading frame 40	4.49	1.7	0.5	7	1.4
ILF3	mRNA	3609	NM_017620	chr19	+	10796441	Is	OtherPAS	18.5	-5.9	-0.6	3.1	interleukin enhancer binding factor 3, 90kDa	68.839	1.2	0.6	3	55.1
PLEKHJ1	mRNA	55111	NM_018049	chr19	-	2233152	F	AATAAA	90	5.3	0.7	3.1	pleckstrin homology domain containing, family J member 1	52.378	1.1	0.3	3	27
C19orf66	mRNA	55337	NM_018381	chr19	+	10203919	L	AATAAA	1.3	2.5	0.4	3.1	chromosome 19 open reading frame 66	59.112	1.8	4.9	3	13.3
NEAT1	lncRNA	283131	NR_028272	chr11	+	65194392	M	AATAAA	15.1	-10.7	-3.1	3.1	nuclear paraspeckle assembly transcript 1 (non-protein coding)	118.972	1	0.1	7	15.4
RP11-453E17.1	lncRNA	NA	ENST00000500538	chr4	+	68588223	Is	ATTAAA	50	-43.3	-1.9	3.1		5.986	3.4	3	7	3
RP3-399L15.3	lncRNA	NA	ENST00000519104	chr6	+	114465184	Is	AATAAA	100	NA	NA	3.1		1.497	-999	-0.6	5	1.2
RP11-450H5.1	lncRNA	NA	ENST00000495159	chr3	-	166284476	L	AATAAA	0	0	NA	3.1		65.846	-2.7	-6.8	5	15.3
OSBPL2	mRNA	9885	NM_144498	chr20	+	60869945	M	ATTAAA	88.7	3.6	0.7	3	oxysterol binding protein-like 2	231.958	-1.5	-5	3	33
RAB22A	mRNA	57403	NM_020673	chr20	+	56935721	F	AATAAA	62.5	-1.4	-0.1	3	RAB22A, member RAS oncogene family	65.846	1.1	0.3	4	11
DKC1	mRNA	1736	NM_001363	chrX	+	154005855	M	ATTAAA	80.8	-19	-1.1	3	dyskeratosis congenita 1, dyskerin	38.909	-1.7	-1.8	3	2.3
DKC1	mRNA	1736	NM_001363	chrX	+	154005959	L	ATTAAA	19.2	10.2	0.5	3	dyskeratosis congenita 1, dyskerin	38.909	-1.7	-1.8	3	2.3
PHF8	mRNA	23133	NM_015107	chrX	-	53959441	L	ATTAAA	0	52	3	3	PHD finger protein 8	10.476	1.6	0.7	5	0.7
NKRF	mRNA	55922	NM_001173488	chrX	-	118723233	M	ATTAAA	63.8	-10.5	-0.3	3	NFKB repressing factor	35.168	-1.7	-1.7	4	2.7
DTNA	mRNA	1837	NM_001198939	chr18	+	32471309	M	ATTAAA	3.5	2.8	0.2	3	dystrobrevin, alpha	42.65	-1	0	8	4.1
CHMP1B	mRNA	57132	NM_020412	chr18	+	11852697	F	AATAAA	44.8	-9.5	-0.8	3	charged multivesicular body protein 1B	143.665	-2.5	-12.6	3	33.3
TCEB1	mRNA	6921	NM_001204858	chr8	-	74857920	M	NoPAS	0	9.1	3	3	transcription elongation factor B (SIII), polypeptide 1 (15kDa, elongin C)	83.056	-1.2	-0.9	6	23.1
OSGIN2	mRNA	734	NM_001126111	chr8	+	90940100	L	AATAAA	4.8	-4.8	-0.3	3	oxidative stress induced growth inhibitor family member 2	15.713	1	0	10	0.6
IMPAD1	mRNA	54928	NM_017813	chr8	-	57878171	Ic	AATAAA	11.8	-11.8	-3	3	inositol monophosphatase domain containing 1	25.441	4	15.4	7	15.4
APBB2	mRNA	323	NM_004307	chr4	-	40814796	M	ATTAAA	23.5	-7.6	-0.7	3	amyloid beta (A4) precursor protein-binding, family B, member 2	76.322	-1.1	-0.1	6	2.2
MSMO1	mRNA	6307	NM_006745	chr4	+	166264222	F	AATAAA	86.4	-15	-0.5	3	methylsterol monooxygenase 1	16.462	1.4	0.7	3	47.9
PPAT	mRNA	5471	NM_002703	chr4	-	57260958	M	ATTAAA	5.1	-5.1	-0.3	3	phosphoribosyl pyrophosphate amidotransferase	44.147	-2.7	-4.7	8	4.7
SCARB2	mRNA	950	NM_005506	chr4	-	77082605	F	AATAAA	48.2	-5.3	-0.2	3	scavenger receptor class B, member 2	41.902	-1.1	-0.2	5	25
SRP72	mRNA	6731	NM_006947	chr4	+	57368581	M	AATAAA	0	0	NA	3	signal recognition particle 72kDa	80.811	-1.2	-0.6	5	2.6
TAPT1	mRNA	202018	NM_153365	chr4	-	16162914	M	AATAAA	50	-16.7	-0.4	3	transmembrane anterior posterior transformation 1	5.986	3	2.4	5	2.5
FGF2	mRNA	2247	NM_002006	chr4	+	123819391	L	AATAAA	40	10	0.1	3	fibroblast growth factor 2 (basic)	11.224	1.4	0.5	5	2.4
DCUN1D3	mRNA	123879	NM_173475	chr16	-	20869392	M	AATAAA	38.5	-38.5	-0.8	3	DCN1, defective in cullin neddylation 1, domain containing 3 (S. cerevisiae)	19.455	-5.8	-4.4	6	4.4
CLUAP1	mRNA	23059	NM_024793	chr16	+	3586580	F	Arich	76.3	-33.1	-3	3	clusterin associated protein 1	44.147	-1.5	-1.3	8	1.3
SVIL	mRNA	6840	NM_021738	chr10	-	29746289	L	AATAAA	32.7	7.3	0.3	3	supervillin	41.154	-1.5	-1.3	3	1.3
MARCH5	mRNA	54708	NM_017824	chr10	+	94111135	F	NoPAS	6.6	-2.7	-3	3	membrane-associated ring finger (C3HC4) 5	1343.86	-1.5	-30.7	2	30.7
MARCH5	mRNA	54708	NM_017824	chr10	+	94111613	L	ATTAAA	93.4	2.7	3	3	membrane-associated ring finger (C3HC4) 5	1343.86	-1.5	-30.7	2	30.7
RCAN1	mRNA	1827	NM_004414	chr21	-	35888782	L	AATAAA	0	50	0.3	3	regulator of calcineurin 1	1.497	3.6	0.9	4	75.5
NCS1	mRNA	23413	NM_014286	chr9	+	132995928	M	NoPAS	12.8	-11.7	-3	3	neuronal calcium sensor 1	134.686	-2.2	-9.7	7	50.9
FIBCD1	mRNA	84929	NM_032843	chr9	-	133777882	F	AATAAA	NA	NA	NA	3	fibrinogen C domain containing 1	0	999	0.6	4	6.6
EXD3	mRNA	54932	NM_017820	chr9	-	140286254	Is	AATAAA	13.3	-13.3	-0.3	3	exonuclease 3'-5' domain containing 3	11.224	-1.7	-0.6	6	20.9
ACO1	mRNA	48	NM_002197	chr9	+	32450731	F	OtherPAS	35.9	-3.7	-0.1	3	aconitase 1, soluble	47.888	1.3	0.8	4	11.3
SET	mRNA	6418	NM_003011	chr9	+	131457610	F	AATAAA	0	0	NA	3	SET nuclear oncogene	80.811	2.4	16.1	3	57.3
GNE	mRNA	10020	NM_005476	chr9	-	36217060	F	OtherPAS	22.6	-4.7	-0.1	3	glucosamine (UDP-N-acetyl)-2-epimerase/N-acetylmannosamine kinase	23.196	-1.2	-0.4	2	2.6
GNE	mRNA	10020	NM_005476	chr9	-	36214438	L	AATAAA	77.4	4.7	0.1	3	glucosamine (UDP-N-acetyl)-2-epimerase/N-acetylmannosamine kinase	23.196	-1.2	-0.4	2	2.6
STXBP1	mRNA	6812	NM_003165	chr9	+	130454825	M	OtherPAS	20	3.1	0	3	syntaxin binding protein 1	14.965	1.8	1.4	3	6
ZNF862	mRNA	643641	NM_001099220	chr7	+	149545865	Ic	AATAAA	72.5	-37.6	-3	3	zinc finger protein 862	29.93	-1	0	4	2.6
ASL	mRNA	435	NM_001024943	chr7	+	65550150	Ic	OtherPAS	35	46.8	3	3	argininosuccinate lyase	14.965	1.5	0.8	5	3.1
GNA12	mRNA	2768	NM_007353	chr7	-	2766701	L	AATAAA	9.1	58.5	3	3	guanine nucleotide binding protein (G protein) alpha 12	8.231	2.8	2.6	5	3.6
COPS6	mRNA	10980	NM_006833	chr7	+	99689533	F	AATAAA	77.8	-7.3	-0.5	3	COP9 constitutive photomorphogenic homolog subunit 6 (Arabidopsis)	40.406	1.8	3.2	2	4.8
COPS6	mRNA	10980	NM_006833	chr7	+	99689808	L	OtherPAS	22.2	7.3	0.5	3	COP9 constitutive photomorphogenic homolog subunit 6 (Arabidopsis)	40.406	1.8	3.2	2	4.8
ALDH3B1	mRNA	221	NM_001161473	chr11	+	67783253	Ic	AATAAA	0	18.8	3	3	aldehyde dehydrogenase 3 family, member B1	47.888	-2.2	-3.7	5	3.7
C11orf58	mRNA	10944	NM_014267	chr11	+	16779652	L	AATAAA	73.5	4.1	0.4	3	chromosome 11 open reading frame 58	127.203	1.4	3.8	6	4.8
GALNTL4	mRNA	374378	NM_198516	chr11	-	11383556	Ic	AATAAA	0	0	NA	3	UDP-N-acetyl-alpha-D-galactosamine:polypeptide N-acetylgalactosaminyltransferase-like 4	8.979	3.7	5.1	3	5.1
SF3B2	mRNA	10992	NM_006842	chr11	+	65826810	Ic	NoPAS	11.5	3.2	0.6	3	splicing factor 3b, subunit 2, 145kDa	240.189	-1.1	-0.5	2	5.7
SF3B2	mRNA	10992	NM_006842	chr11	+	65836363	S	AATAAA	88.5	-3.2	-0.6	3	splicing factor 3b, subunit 2, 145kDa	240.189	-1.1	-0.5	2	5.7
NMT1	mRNA	4836	NM_021079	chr17	+	43183342	F	AATAAA	97	-3.3	-3	3	N-myristoyltransferase 1	755.736	-1.5	-15.5	2	15.5
NMT1	mRNA	4836	NM_021079	chr17	+	43186384	L	AATAAA	3	3.3	3	3	N-myristoyltransferase 1	755.736	-1.5	-15.5	2	15.5
SMARCE1	mRNA	6605	NM_003079	chr17	-	38786966	E	Arich	2.5	4	0.2	3	SWI/SNF related, matrix associated, actin dependent regulator of chromatin, subfamily e, member 1	29.93	1	0	4	7
FAM100B	mRNA	283991	NM_182565	chr17	+	74266788	F	NoPAS	65.4	-3.9	-0.5	3	family with sequence similarity 100, member B	177.336	1.9	17.1	2	17.1
FAM100B	mRNA	283991	NM_182565	chr17	+	74267375	L	OtherPAS	34.6	3.9	0.5	3	family with sequence similarity 100, member B	177.336	1.9	17.1	2	17.1
H3F3B	mRNA	3021	NM_005324	chr17	-	73774631	F	OtherPAS	60	-16.1	-0.7	3	H3 histone, family 3B (H3.3B)	29.93	-1.1	-0.1	5	8.7
ZBTB4	mRNA	57659	NM_020899	chr17	-	7362998	F	ATTAAA	38.3	0.9	0	3	zinc finger and BTB domain containing 4	35.168	-1	0	2	13.1
ZBTB4	mRNA	57659	NM_020899	chr17	-	7362697	L	AATAAA	61.7	-0.9	0	3	zinc finger and BTB domain containing 4	35.168	-1	0	2	13.1
HDAC5	mRNA	10014	NM_001015053	chr17	-	42155662	F	ATTAAA	100	-25	-0.9	3	histone deacetylase 5	8.979	1.2	0.2	2	0.2
HDAC5	mRNA	10014	NM_001015053	chr17	-	42154121	L	AATAAA	0	25	0.9	3	histone deacetylase 5	8.979	1.2	0.2	2	0.2
SYNJ2BP	mRNA	55333	NM_018373	chr14	-	70833216	L	AATAAA	42.4	24.3	1	3	synaptojanin 2 binding protein	24.692	-1.7	-1.3	5	5.1
TMED10	mRNA	10972	NM_006827	chr14	-	75600947	F	ATTAAA	86.5	-4.1	-0.2	3	transmembrane emp24-like trafficking protein 10 (yeast)	27.685	-2.4	-2.6	3	16.2
TMED10	mRNA	10972	NM_006827	chr14	-	75598172	L	AATAAA	5.4	12.2	0.5	3	transmembrane emp24-like trafficking protein 10 (yeast)	27.685	-2.4	-2.6	3	16.2
WDR89	mRNA	112840	NM_001008726	chr14	-	64091711	E	AATAAA	64.7	8	0.1	3	WD repeat domain 89	12.72	1.8	1.2	6	1.4
M6PR	mRNA	4074	NM_002355	chr12	-	9092957	L	ATTAAA	16.7	-16.7	0	3	mannose-6-phosphate receptor (cation dependent)	4.49	-1.7	-0.3	4	5
ANKRD52	mRNA	283373	NM_173595	chr12	-	56619096	L	AATAAA	0	3.8	1.4	3	ankyrin repeat domain 52	107	-2	-6.3	3	6.3
MLEC	mRNA	9761	NM_014730	chr12	+	121139662	L	AATAAA	50	-1.3	0	3	malectin	10.476	10.1	27.9	4	27.9
GAS2L3	mRNA	283431	NM_174942	chr12	+	101022064	L	ATTAAA	100	-11.1	0	3	growth arrest-specific 2 like 3	1.497	4.1	1.2	4	7
FRS2	mRNA	10818	NM_006654	chr12	+	69972962	M	AATAAA	11.4	-5.7	-0.6	3	fibroblast growth factor receptor substrate 2	59.112	-1.2	-0.7	5	3.2
SH2B3	mRNA	10019	NM_005475	chr12	+	111887007	M	AATAAA	40.7	-12.1	-0.4	3	SH2B adaptor protein 3	20.203	1.2	0.2	3	9.7
SH2B3	mRNA	10019	NM_005475	chr12	+	111889427	L	ATTAAA	48.1	20.5	0.9	3	SH2B adaptor protein 3	20.203	1.2	0.2	3	9.7
DTNB	mRNA	1838	NM_021907	chr2	-	25781058	Ic	AATAAA	90.9	9.1	0	3	dystrobrevin, beta	8.231	-4.1	-1.5	4	2
TMEM87B	mRNA	84910	NM_032824	chr2	+	112874075	M	ATTAAA	22.2	-21.3	-3	3	transmembrane protein 87B	13.469	5.8	16.1	4	16.1
SEMA4F	mRNA	10505	NM_004263	chr2	+	74909184	M	AATAAA	97.8	-1.3	0	3	sema domain, immunoglobulin domain (Ig), transmembrane domain (TM) and short cytoplasmic domain, (semaphorin) 4F	34.42	1.1	0.2	3	1.6
SCLY	mRNA	51540	NM_016510	chr2	+	239000700	Ic	NoPAS	34.8	-32.2	-3	3	selenocysteine lyase	17.21	1.5	0.8	4	30.3
MRPS18A	mRNA	55168	NM_018135	chr6	-	43639191	F	OtherPAS	80.7	-4.9	-1.1	3	mitochondrial ribosomal protein S18A	367.392	-1.3	-3.2	2	41.1
MRPS18A	mRNA	55168	NM_018135	chr6	-	43639044	L	NoPAS	19.3	4.9	1.1	3	mitochondrial ribosomal protein S18A	367.392	-1.3	-3.2	2	41.1
NT5E	mRNA	4907	NM_002526	chr6	+	86181317	Ic	ATTAAA	51.7	-18.5	-2	3	5'-nucleotidase, ecto (CD73)	44.895	3.3	18.7	5	18.7
VEGFA	mRNA	7422	NM_001171623	chr6	+	43738143	E	OtherPAS	6.8	16	1.8	3	vascular endothelial growth factor A	44.147	1.2	0.5	7	12.8
DST	mRNA	667	NM_015548	chr6	-	56323680	F	OtherPAS	90.6	-25	-3	3	dystonin	47.888	-1.2	-0.4	4	0.7
XPO5	mRNA	57510	NM_020750	chr6	-	43490076	M	OtherPAS	0	10.5	0.3	3	exportin 5	13.469	-1	0	6	0.6
XRN1	mRNA	54464	NM_019001	chr3	-	142135937	Ic	AATAAA	83.3	-69	-3	3	5'-3' exoribonuclease 1	8.979	1.1	0	7	0.3
BDH1	mRNA	622	NM_203314	chr3	-	197236654	L	ATTAAA	0	0	NA	3	3-hydroxybutyrate dehydrogenase, type 1	8.231	3.2	3.5	3	3.5
SHOX2	mRNA	6474	NM_003030	chr3	-	157821592	Is	OtherPAS	1.6	7.2	3	3	short stature homeobox 2	142.168	1.3	2.2	4	6.5
LARS2	mRNA	23395	NM_015340	chr3	+	45590329	F	AATAAA	93.6	-21.4	-3	3	leucyl-tRNA synthetase 2, mitochondrial	58.364	-1.6	-2.1	5	32.9
HLTF	mRNA	6596	NM_003071	chr3	-	148786351	Ic	AATAAA	0	0	NA	3	helicase-like transcription factor	3.741	-1.4	-0.1	4	2
CTDSPL	mRNA	10217	NM_001008392	chr3	+	38018592	Ic	AATAAA	16.7	60	3	3	CTD (carboxy-terminal domain, RNA polymerase II, polypeptide A) small phosphatase-like	8.979	2.3	1.7	4	6.4
KLHL18	mRNA	23276	NM_025010	chr3	+	47328947	Ic	OtherPAS	0	10.6	3	3	kelch-like 18 (Drosophila)	65.098	1.1	0.2	3	15.8
ISY1	mRNA	57461	NM_001199469	chr3	-	128848026	M	ATTAAA	14.7	-7.9	-1.6	3	ISY1 splicing factor homolog (S. cerevisiae)	96.525	1.5	4.1	3	4.1
NAA50	mRNA	80218	NM_025146	chr3	-	113437840	M	AATAAA	0	25	3	3	N(alpha)-acetyltransferase 50, NatE catalytic subunit	28.434	-1.3	-0.6	10	9.1
PLD1	mRNA	5337	NM_002662	chr3	-	171506366	Is	AATAAA	0	0	NA	3	phospholipase D1, phosphatidylcholine-specific	7.483	1.4	0.4	9	18.4
GDAP2	mRNA	54834	NM_017686	chr1	-	118412851	F	OtherPAS	6.5	-6.2	-3	3	ganglioside induced differentiation associated protein 2	68.839	2.8	19.7	3	19.7
FHAD1	mRNA	114827	NM_052929	chr1	+	15656498	Ic	OtherPAS	7.1	-3.5	-0.2	3	forkhead-associated (FHA) phosphopeptide binding domain 1	31.427	1.2	0.4	14	5.4
CDC73	mRNA	79577	NM_024529	chr1	+	193223031	M	AATAAA	5	12.8	0.6	3	cell division cycle 73, Paf1/RNA polymerase II complex component, homolog (S. cerevisiae)	14.965	2	2.1	7	2.1
DHX9	mRNA	1660	NM_001357	chr1	+	182806324	UA	AATAAA	16.7	8.3	0.1	3	DEAH (Asp-Glu-Ala-His) box polypeptide 9	17.958	-1.1	-0.1	6	27.2
CAPN2	mRNA	824	NM_001748	chr1	+	223963541	M	AATAAA	47.1	2	0.1	3	calpain 2, (m/II) large subunit	50.881	4.6	39.7	6	70.9
ZRANB2	mRNA	9406	NM_005455	chr1	-	71532064	Ic	AATAAA	20	-1	0	3	zinc finger, RAN-binding domain containing 2	33.671	-2.4	-3.1	8	3.4
SF3A3	mRNA	10946	NM_006802	chr1	-	38423628	F	AATAAA	72.2	1.9	0	3	splicing factor 3a, subunit 3, 60kDa	26.937	-1.5	-0.9	2	1.4
SF3A3	mRNA	10946	NM_006802	chr1	-	38422647	L	AATAAA	27.8	-1.9	0	3	splicing factor 3a, subunit 3, 60kDa	26.937	-1.5	-0.9	2	1.4
AKR7A2	mRNA	8574	NM_003689	chr1	-	19630459	F	NoPAS	35.7	-26.6	-0.7	3	aldo-keto reductase family 7, member A2 (aflatoxin aldehyde reductase)	10.476	-1.4	-0.4	5	0.7
TMED9	mRNA	54732	NM_017510	chr5	+	177023125	L	AATAAA	53.3	-12.4	-0.3	3	transmembrane emp24 protein transport domain containing 9	11.224	2.7	3.2	3	3.2
TRIM23	mRNA	373	NM_001656	chr5	-	64885802	M	OtherPAS	80	-62.4	-3	3	tripartite motif containing 23	11.224	1	0	5	0.2
TMED7-TICAM2	mRNA	100302736	NM_001164469	chr5	-	114950059	Ic	ATTAAA	21.6	-12.1	-0.5	3	TMED7-TICAM2 readthrough	27.685	-2	-1.8	13	4.7
RNF14	mRNA	9604	NM_004290	chr5	+	141367604	F	ATTAAA	99.8	-0.2	-1.1	3	ring finger protein 14	4245.59	-2.2	-276.7	2	276.7
RNF14	mRNA	9604	NM_004290	chr5	+	141368751	L	AATAAA	0.2	0.2	1.1	3	ring finger protein 14	4245.59	-2.2	-276.7	2	276.7
TMEM167A	mRNA	153339	NM_174909	chr5	-	82348665	M	AATAAA	5.3	3.2	0.2	3	transmembrane protein 167A	42.65	-1.3	-0.8	10	1.6
AKAP13	mRNA	11214	NM_006738	chr15	+	86292586	E	AATAAA	20	-15	-0.7	3	A kinase (PRKA) anchor protein 13	18.706	-1.4	-0.5	5	2.4
UACA	mRNA	55075	NM_001008224	chr15	-	70946898	L	AATAAA	21.7	13.6	0.7	3	uveal autoantigen with coiled-coil domains and ankyrin repeats	34.42	1	0	4	1.9
MYO5A	mRNA	4644	NM_000259	chr15	-	52599480	L	AATAAA	38.1	31.3	1.6	3	myosin VA (heavy chain 12, myoxin)	15.713	1.5	1	4	6.8
HERC2	mRNA	8924	NM_004667	chr15	-	28443477	Ic	AATAAA	33.3	48.5	1.4	3	hect domain and RLD 2	8.979	-1.2	-0.2	4	2.6
DUT	mRNA	1854	NM_001025248	chr15	+	48635566	L	AATAAA	0	21.1	3	3	deoxyuridine triphosphatase	28.434	1.7	2	4	10.3
MAN2C1	mRNA	4123	NM_006715	chr15	-	75648133	F	AATAAA	97.4	2.6	1.6	3	mannosidase, alpha, class 2C, member 1	143.665	1	0	2	2
MAN2C1	mRNA	4123	NM_006715	chr15	-	75647545	L	ATTAAA	2.6	-2.6	-1.6	3	mannosidase, alpha, class 2C, member 1	143.665	1	0	2	2
ARSA	mRNA	410	NM_000487	chr22	-	51063456	F	NoPAS	30.6	-4.7	-0.1	3	arylsulfatase A	36.664	-2	-2.4	3	3.5
JOSD1	mRNA	9929	NM_014876	chr22	-	39081626	F	ATTAAA	100	-75	-3	3	Josephin domain containing 1	6.734	1.2	0.1	3	0.4
ZNF576	mRNA	79177	NM_024327	chr19	+	44104156	M	ATTAAA	54.5	-2.3	0	3	zinc finger protein 576	24.692	-1.6	-1	5	6.8
TNNT1	mRNA	7138	NM_003283	chr19	-	55644199	F	AATAAA	72.7	20.2	0.9	3	troponin T type 1 (skeletal, slow)	16.462	1.1	0.2	3	10.4
TNNT1	mRNA	7138	NM_003283	chr19	-	55644161	M	NoPAS	4.5	-0.9	0	3	troponin T type 1 (skeletal, slow)	16.462	1.1	0.2	3	10.4
MAST1	mRNA	22983	NM_014975	chr19	+	12969731	Ic	NoPAS	100	-2.6	0	3	microtubule associated serine/threonine kinase 1	8.979	2.9	3.2	3	16.9
FLJ35776	lncRNA	649446	NR_024101	chr18	+	3596806	F	OtherPAS	0	46.2	1.7	3	uncharacterized LOC649446	7.483	1.2	0.1	6	0.5
LINC00273	lncRNA	649159	NR_038368	chr16	-	33963939	UA	NoPAS	14.6	19.4	1.4	3	long intergenic non-protein coding RNA 273	35.916	-1	0	5	5.3
LOC728730	lncRNA	728730	NR_037875	chr2	+	39701739	Is	NoPAS	60	10.6	0.3	3	uncharacterized LOC728730	11.224	3.1	4.2	11	4.2
LOC728730	lncRNA	728730	NR_037875	chr2	+	39726012	Is	AATAAA	13.3	-1.5	0	3	uncharacterized LOC728730	11.224	3.1	4.2	11	4.2
LOC643401	lncRNA	643401	NR_038848	chr5	+	27485252	Ic	OtherPAS	90	6.6	0.8	3	uncharacterized LOC643401	82.308	-2.1	-5.3	8	5.3
TMEM189	mRNA	387521	NM_199129	chr20	-	48742427	Ic	ATTAAA	0.9	5.2	2.9	2.9	transmembrane protein 189	419.77	-5.4	-80.9	3	108.3
PLK1S1	mRNA	55857	NM_018474	chr20	+	21126391	Ic	AATAAA	NA	NA	NA	2.9	polo-like kinase 1 substrate 1	0	NA	0	3	3.7
RBBP9	mRNA	10741	NM_006606	chr20	-	18467500	M	ATTAAA	82.4	3.7	0.2	2.9	retinoblastoma binding protein 9	12.72	1.9	1.6	4	1.6
ABCD1	mRNA	215	NM_000033	chrX	+	152995352	Ic	ATTAAA	0	0	NA	2.9	ATP-binding cassette, sub-family D (ALD), member 1	35.168	-8.7	-9.4	2	10.8
ABCD1	mRNA	215	NM_000033	chrX	+	153010208	S	OtherPAS	100	0	0	2.9	ATP-binding cassette, sub-family D (ALD), member 1	35.168	-8.7	-9.4	2	10.8
MCTS1	mRNA	28985	NM_014060	chrX	+	119746242	F	AATAAA	92.3	7.7	0.3	2.9	malignant T cell amplified sequence 1	19.455	-1.6	-0.9	3	10.5
FUNDC1	mRNA	139341	NM_173794	chrX	-	44382885	M	ATTAAA	100	-100	-2.9	2.9	FUN14 domain containing 1	5.238	-1.5	-0.2	3	0.2
SERPINB8	mRNA	5271	NM_198833	chr18	+	61656608	L	AATAAA	26.3	-15.8	-0.4	2.9	serpin peptidase inhibitor, clade B (ovalbumin), member 8	14.217	-1.1	-0.1	3	45.4
NUDT6	mRNA	11162	NM_007083	chr4	-	123833700	Ic	AATAAA	100	0	0	2.9	nudix (nucleoside diphosphate linked moiety X)-type motif 6	1.497	5.4	1.8	2	1.8
NUDT6	mRNA	11162	NM_007083	chr4	-	123803030	S	ATTAAA	0	0	NA	2.9	nudix (nucleoside diphosphate linked moiety X)-type motif 6	1.497	5.4	1.8	2	1.8
PGRMC2	mRNA	10424	NM_006320	chr4	-	129192064	M	Arich	18.8	-5.4	-0.2	2.9	progesterone receptor membrane component 2	23.944	2.7	6.7	6	11.8
KLHL5	mRNA	51088	NM_015990	chr4	+	39123829	M	OtherPAS	62.1	3.3	0	2.9	kelch-like 5 (Drosophila)	21.699	-1.2	-0.3	6	9
STK24	mRNA	8428	NM_001032296	chr13	-	99104413	E	AATAAA	16.8	19.4	2.9	2.9	serine/threonine kinase 24	80.063	1.1	0.2	5	0.9
NOL3	mRNA	8996	NM_001185058	chr16	+	67209096	F	AATAAA	51.1	-11.8	-0.7	2.9	nucleolar protein 3 (apoptosis repressor with CARD domain)	35.168	1.6	2.1	2	3.5
NOL3	mRNA	8996	NM_001185058	chr16	+	67209626	L	OtherPAS	48.9	11.8	0.7	2.9	nucleolar protein 3 (apoptosis repressor with CARD domain)	35.168	1.6	2.1	2	3.5
SALL1	mRNA	6299	NM_001127892	chr16	-	51170589	F	AATAAA	22.2	-6.2	-0.2	2.9	sal-like 1 (Drosophila)	6.734	2.5	1.8	3	2.3
IRX3	mRNA	79191	NM_024336	chr16	-	54317321	M	AATAAA	29.4	8.1	0.3	2.9	iroquois homeobox 3	25.441	1.3	0.5	3	10.2
NOB1	mRNA	28987	NM_014062	chr16	-	69775905	F	AATAAA	1	-1	-0.5	2.9	NIN1/RPN12 binding protein 1 homolog (S. cerevisiae)	310.525	-2.3	-23	2	27
NOB1	mRNA	28987	NM_014062	chr16	-	69775774	L	AATAAA	99	1	0.5	2.9	NIN1/RPN12 binding protein 1 homolog (S. cerevisiae)	310.525	-2.3	-23	2	27
ANXA7	mRNA	310	NM_004034	chr10	-	75135539	F	AATAAA	7.4	45.9	2.8	2.9	annexin A7	20.203	-2	-1.5	3	30.6
ANXA7	mRNA	310	NM_004034	chr10	-	75135192	M	AATAAA	81.5	-34.8	-1.5	2.9	annexin A7	20.203	-2	-1.5	3	30.6
VSTM4	mRNA	196740	NM_001031746	chr10	-	50225982	M	AATAAA	16.7	-16.7	-2	2.9	V-set and transmembrane domain containing 4	40.406	-1.7	-1.8	5	26.4
SAR1A	mRNA	56681	NM_001142648	chr10	-	71911754	M	OtherPAS	1	-0.2	0	2.9	SAR1 homolog A (S. cerevisiae)	78.567	1.1	0.2	5	8.6
KIF5B	mRNA	3799	NM_004521	chr10	-	32298193	M	AATAAA	64.2	7.6	0.4	2.9	kinesin family member 5B	39.657	1.8	3.1	5	3.1
IPPK	mRNA	64768	NM_022755	chr9	-	95376838	F	NoPAS	25	34.6	2.9	2.9	inositol 1,3,4,5,6-pentakisphosphate 2-kinase	29.93	1.2	0.3	3	1.1
MRRF	mRNA	92399	NM_138777	chr9	+	125093616	L	ATTAAA	0	11.1	0.4	2.9	mitochondrial ribosome recycling factor	9.727	-1.6	-0.5	5	2.1
GNAQ	mRNA	2776	NM_002072	chr9	-	80334970	M	Arich	100	-83.3	-2.9	2.9	guanine nucleotide binding protein (G protein), q polypeptide	7.483	-1.8	-0.5	9	0.9
NRF1	mRNA	4899	NM_005011	chr7	+	129396912	L	AATAAA	0	1.6	0	2.9	nuclear respiratory factor 1	27.685	1.5	1.3	4	1.3
AGFG2	mRNA	3268	NM_006076	chr7	+	100163613	M	Arich	41.2	-26.7	-2.9	2.9	ArfGAP with FG repeats 2	50.881	-1.4	-1.1	7	1.4
C7orf74	mRNA	168455	NM_175884	chr7	-	106294806	L	AATAAA	0	0	NA	2.9	chromosome 7 open reading frame 74	9.727	1.1	0.1	5	1.5
GNA12	mRNA	2768	NM_007353	chr7	-	2769458	M	OtherPAS	54.5	-48.6	-2.9	2.9	guanine nucleotide binding protein (G protein) alpha 12	8.231	2.8	2.6	5	3.6
EPDR1	mRNA	54749	NM_017549	chr7	+	37990121	F	OtherPAS	2.3	9.3	2.9	2.9	ependymin related protein 1 (zebrafish)	162.371	-2.5	-14.3	4	14.3
LDHA	mRNA	3939	NM_001165414	chr11	+	18428939	M	ATTAAA	3.9	-2.2	-0.4	2.9	lactate dehydrogenase A	57.615	1.4	1.5	6	42.1
TTC17	mRNA	55761	NM_018259	chr11	+	43516481	S	AATAAA	12.6	-0.7	-0.1	2.9	tetratricopeptide repeat domain 17	142.168	-1.5	-3.3	3	3.3
FADD	mRNA	8772	NM_003824	chr11	+	70056319	L	AATAAA	3.9	0.8	0	2.9	Fas (TNFRSF6)-associated via death domain	38.161	-1.3	-0.7	3	4
PLCB3	mRNA	5331	NM_000932	chr11	+	64035395	F	AATAAA	97.5	-13.6	-2.9	2.9	phospholipase C, beta 3 (phosphatidylinositol-specific)	59.112	2.5	12.4	2	64.5
PLCB3	mRNA	5331	NM_000932	chr11	+	64036896	L	NoPAS	2.5	13.6	2.9	2.9	phospholipase C, beta 3 (phosphatidylinositol-specific)	59.112	2.5	12.4	2	64.5
PHRF1	mRNA	57661	NM_020901	chr11	+	612167	M	OtherPAS	0	0	NA	2.9	PHD and ring finger domains 1	2.993	-1.5	-0.2	5	3
RSF1	mRNA	51773	NM_016578	chr11	-	77371054	L	AATAAA	0	0	NA	2.9	remodeling and spacing factor 1	2.245	1.2	0	7	1
PPFIA1	mRNA	8500	NM_003626	chr11	+	70115299	UA	AATAAA	14.5	-3.1	-0.2	2.9	protein tyrosine phosphatase, receptor type, f polypeptide (PTPRF), interacting protein (liprin), alpha 1	87.546	-1.1	-0.2	3	4.3
SIRT3	mRNA	23410	NM_012239	chr11	-	215427	M	OtherPAS	33.3	12.2	0	2.9	sirtuin 3	2.245	3.3	1.2	4	1.2
C17orf101	mRNA	79701	NM_175902	chr17	-	80347992	M	OtherPAS	11.9	8.1	0.4	2.9	chromosome 17 open reading frame 101	31.427	-1	0	6	0.2
BIRC5	mRNA	332	NM_001012271	chr17	+	76220780	M	AATAAA	67.1	18.9	2.9	2.9	baculoviral IAP repeat containing 5	61.357	1.7	4.4	4	200.8
PRKCA	mRNA	5578	NM_002737	chr17	+	64806860	L	AATAAA	79.1	12.9	2.9	2.9	protein kinase C, alpha	100.266	1.2	0.8	3	2.4
UBE2Z	mRNA	65264	NM_023079	chr17	+	47006418	L	AATAAA	97.7	-10.5	-2.9	2.9	ubiquitin-conjugating enzyme E2Z	99.518	-1.3	-1.1	3	1.1
CALCOCO2	mRNA	10241	NM_005831	chr17	+	46941204	F	AATAAA	5.3	1	0.2	2.9	calcium binding and coiled-coil domain 2	226.721	1.1	0.9	4	15.1
WARS	mRNA	7453	NM_004184	chr14	-	100800127	L	AATAAA	27	19.2	2.9	2.9	tryptophanyl-tRNA synthetase	110.741	-1.2	-1.1	3	18.9
NPC2	mRNA	10577	NM_006432	chr14	-	74946529	L	NoPAS	5.5	0.5	0.2	2.9	Niemann-Pick disease, type C2	356.917	1.2	1.8	3	74
ABHD4	mRNA	63874	NM_022060	chr14	+	23081265	F	AATAAA	0	100	0.7	2.9	abhydrolase domain containing 4	2.993	-4.4	-0.7	4	1.5
DIO2	mRNA	1734	NM_000793	chr14	-	80666164	F	OtherPAS	94.6	-69.6	-2.9	2.9	deiodinase, iodothyronine, type II	83.804	-31	-30.5	2	30.5
DIO2	mRNA	1734	NM_000793	chr14	-	80663869	L	AATAAA	5.4	69.6	2.9	2.9	deiodinase, iodothyronine, type II	83.804	-31	-30.5	2	30.5
FCF1	mRNA	51077	NM_015962	chr14	+	75217409	L	OtherPAS	0	14.3	1	2.9	FCF1 small subunit (SSU) processome component homolog (S. cerevisiae)	20.203	-1.1	0	6	9.3
UBE3B	mRNA	89910	NM_130466	chr12	+	109974507	L	ATTAAA	13.3	-4.4	-0.4	2.9	ubiquitin protein ligase E3B	62.105	1.3	1.4	5	1.4
NCOR2	mRNA	9612	NM_006312	chr12	-	124956556	Ic	AATAAA	0	28.6	2	2.9	nuclear receptor corepressor 2	20.203	-2.1	-1.7	5	5.3
PAWR	mRNA	5074	NM_002583	chr12	-	80061247	Ic	AATAAA	0	90.9	2.9	2.9	PRKC, apoptosis, WT1, regulator	3.741	2	0.7	5	3.7
PAWR	mRNA	5074	NM_002583	chr12	-	79983568	M	AATAAA	100	-90.9	-2.9	2.9	PRKC, apoptosis, WT1, regulator	3.741	2	0.7	5	3.7
LPCAT3	mRNA	10162	NM_005768	chr12	-	7086857	E	AATAAA	0	100	2.9	2.9	lysophosphatidylcholine acyltransferase 3	11.224	-5.5	-2.5	2	7.9
LPCAT3	mRNA	10162	NM_005768	chr12	-	7085347	S	OtherPAS	100	-100	-2.9	2.9	lysophosphatidylcholine acyltransferase 3	11.224	-5.5	-2.5	2	7.9
DCTN2	mRNA	10540	NM_006400	chr12	-	57924094	F	ATTAAA	13.7	5.1	0.2	2.9	dynactin 2 (p50)	38.161	1.2	0.5	3	4.4
MCFD2	mRNA	90411	NM_001171508	chr2	-	47129013	M	AATAAA	79.2	10.6	1.7	2.9	multiple coagulation factor deficiency 2	71.832	2	8.6	3	8.6
NRP2	mRNA	8828	NM_201266	chr2	+	206573900	Is	AATAAA	1	8.2	2.9	2.9	neuropilin 2	229.714	-5.2	-43.7	12	43.7
HNRNPA3	mRNA	220988	NM_194247	chr2	+	178081109	Ic	AATAAA	4.2	9.4	0.7	2.9	heterogeneous nuclear ribonucleoprotein A3	35.916	1.1	0.2	10	28.8
HSPE1-PHOCN	mRNA	100529241	NM_001202485	chr2	+	198368107	Is	AATAAA	0	0	NA	2.9	HSPE1-MOB4 readthrough	8.979	1.1	0	5	14.1
NPHP1	mRNA	4867	NM_000272	chr2	-	110882951	Ic	AATAAA	93.2	-24.1	-2.9	2.9	nephronophthisis 1 (juvenile)	44.147	-1.2	-0.4	8	1.7
AGPS	mRNA	8540	NM_003659	chr2	+	178403065	F	OtherPAS	0	0	NA	2.9	alkylglycerone phosphate synthase	10.476	-1.5	-0.5	6	6.1
WDR92	mRNA	116143	NM_138458	chr2	-	68357608	M	OtherPAS	0	63.6	2.9	2.9	WD repeat domain 92	8.979	-1.2	-0.2	5	4.2
AGFG1	mRNA	3267	NM_001135187	chr2	+	228425933	L	AATAAA	23.1	26.9	0.8	2.9	ArfGAP with FG repeats 1	9.727	1.3	0.2	8	0.6
STK17B	mRNA	9262	NM_004226	chr2	-	196998437	L	ATTAAA	85.7	14.3	0.3	2.9	serine/threonine kinase 17b	5.238	1	0	3	2.7
C2orf18	mRNA	54978	NM_017877	chr2	+	27004099	M	OtherPAS	0	0	NA	2.9	chromosome 2 open reading frame 18	41.154	1.1	0.3	12	1
RAB10	mRNA	10890	NM_016131	chr2	+	26360280	M	AATAAA	68.5	-14.6	-1.4	2.9	RAB10, member RAS oncogene family	68.839	1	0	4	4.5
C6orf203	mRNA	51250	NM_001142470	chr6	+	107363187	Is	AATAAA	0	0	NA	2.9	chromosome 6 open reading frame 203	56.119	1	0	3	1.3
WTAP	mRNA	9589	NM_004906	chr6	+	160147427	UA	ATTAAA	9.1	18.9	0.8	2.9	Wilms tumor 1 associated protein	16.462	1	0	5	1.1
HLA-B	mRNA	3106	NM_005514	chr6	-	31321737	F	OtherPAS	16.1	-5.8	-0.2	2.9	major histocompatibility complex, class I, B	23.196	-1.2	-0.3	2	999
HLA-B	mRNA	3106	NM_005514	chr6	-	31321649	L	AATAAA	83.9	5.8	0.2	2.9	major histocompatibility complex, class I, B	23.196	-1.2	-0.3	2	999
AGPAT4	mRNA	56895	NM_020133	chr6	-	161557106	F	ATTAAA	82.4	6.2	0.4	2.9	1-acylglycerol-3-phosphate O-acyltransferase 4 (lysophosphatidic acid acyltransferase, delta)	25.441	1.9	2.5	4	25.1
ASCC3	mRNA	10973	NM_006828	chr6	-	101304179	Is	AATAAA	2.3	8.2	0.7	2.9	activating signal cointegrator 1 complex subunit 3	32.923	-2.6	-3.4	3	3.4
LMBRD1	mRNA	55788	NM_018368	chr6	-	70385749	F	ATTAAA	0	33.3	0	2.9	LMBR1 domain containing 1	0.748	10.8	2.4	5	6
PERP	mRNA	64065	NM_022121	chr6	-	138409639	L	AATAAA	0	0	NA	2.9	PERP, TP53 apoptosis effector	130.944	-2.7	-13.1	3	13.1
MAP3K4	mRNA	4216	NM_005922	chr6	+	161455481	E	NoPAS	0	66.7	2.9	2.9	mitogen-activated protein kinase kinase kinase 4	8.979	-1.1	-0.1	3	1.6
BHLHE40	mRNA	8553	NM_003670	chr3	+	5026866	M	AATAAA	7.7	-7.7	-0.5	2.9	basic helix-loop-helix family, member e40	9.727	2.3	2	7	2.9
FNDC3B	mRNA	64778	NM_022763	chr3	+	172118487	M	AATAAA	0	0	NA	2.9	fibronectin type III domain containing 3B	8.979	1.8	1	5	3.6
TOPBP1	mRNA	11073	NM_007027	chr3	-	133319494	F	AATAAA	0	88.9	2.9	2.9	topoisomerase (DNA) II binding protein 1	5.238	1.2	0.1	5	4.1
ALG3	mRNA	10195	NM_001006941	chr3	-	183960211	F	AATAAA	49.2	-10.6	-0.6	2.9	asparagine-linked glycosylation 3, alpha-1,3- mannosyltransferase homolog (S. cerevisiae)	44.147	-1.1	-0.3	2	3.3
ALG3	mRNA	10195	NM_001006941	chr3	-	183960119	L	OtherPAS	50.8	10.6	0.6	2.9	asparagine-linked glycosylation 3, alpha-1,3- mannosyltransferase homolog (S. cerevisiae)	44.147	-1.1	-0.3	2	3.3
PRKAR2A	mRNA	5576	NM_004157	chr3	-	48788679	F	OtherPAS	6.2	68.8	2.9	2.9	protein kinase, cAMP-dependent, regulatory, type II, alpha	11.972	-2.2	-1.2	4	2.3
KLHL18	mRNA	23276	NM_025010	chr3	+	47328833	Ic	NoPAS	94.3	-5.8	-0.7	2.9	kelch-like 18 (Drosophila)	65.098	1.1	0.2	3	15.8
PCNP	mRNA	57092	NM_020357	chr3	+	101313281	M	AATAAA	78.4	21.6	2.9	2.9	PEST proteolytic signal containing nuclear protein	27.685	1	0	4	8
KPNA1	mRNA	3836	NM_002264	chr3	-	122155601	Ic	AATAAA	9.2	20.7	2.9	2.9	karyopherin alpha 1 (importin alpha 5)	65.098	-1.3	-0.8	10	10.6
NAA50	mRNA	80218	NM_025146	chr3	-	113440209	M	Arich	57.9	-39.1	-2.9	2.9	N(alpha)-acetyltransferase 50, NatE catalytic subunit	28.434	-1.3	-0.6	10	9.1
SSX2IP	mRNA	117178	NM_001166417	chr1	-	85112251	M	AATAAA	25	-9.2	-0.3	2.9	synovial sarcoma, X breakpoint 2 interacting protein	17.958	1.4	0.7	8	2.8
AK2	mRNA	204	NM_013411	chr1	-	33475521	M	AATAAA	3.4	-1.3	-0.2	2.9	adenylate kinase 2	86.797	1.1	0.4	5	0.5
CMPK1	mRNA	51727	NM_016308	chr1	+	47843452	F	AATAAA	12.8	6	0.5	2.9	cytidine monophosphate (UMP-CMP) kinase 1, cytosolic	58.364	1.1	0.3	3	5.8
TFAP2E	mRNA	339488	NM_178548	chr1	+	36035408	UA	ATTAAA	NA	NA	NA	2.9	transcription factor AP-2 epsilon (activating enhancer binding protein 2 epsilon)	0	NA	0	3	2.1
NAV1	mRNA	89796	NM_020443	chr1	+	201789881	F	AATAAA	11.1	-1.2	0	2.9	neuron navigator 1	47.14	1	0	4	19.5
CAPN2	mRNA	824	NM_001748	chr1	+	223962694	F	NoPAS	13.2	-10.3	-2.9	2.9	calpain 2, (m/II) large subunit	50.881	4.6	39.7	6	70.9
CTNNBIP1	mRNA	56998	NM_020248	chr1	-	9910508	M	OtherPAS	73.1	-44.1	-2.9	2.9	catenin, beta interacting protein 1	19.455	1.1	0.1	5	3.3
RCOR3	mRNA	55758	NM_001136223	chr1	+	211489361	M	ATTAAA	0	5.3	0	2.9	REST corepressor 3	4.49	2.9	1.6	9	1.6
DHDDS	mRNA	79947	NM_024887	chr1	+	26797797	L	OtherPAS	53.3	-28.7	-2.9	2.9	dehydrodolichyl diphosphate synthase	56.119	-1.5	-1.4	7	1.8
EIF2B3	mRNA	8891	NM_020365	chr1	-	45316448	L	NoPAS	88.2	8.9	1.2	2.9	eukaryotic translation initiation factor 2B, subunit 3 gamma, 58kDa	56.867	-1.2	-0.6	3	8.8
ZNF436	mRNA	80818	NM_001077195	chr1	-	23686468	F	AATAAA	100	-7.1	0	2.9	zinc finger protein 436	4.49	2.1	0.8	3	0.8
TNFRSF9	mRNA	3604	NM_001561	chr1	-	7976887	M	ATTAAA	39.5	-26.6	-2.9	2.9	tumor necrosis factor receptor superfamily, member 9	32.175	1.8	2.7	8	2.7
CYB5R1	mRNA	51706	NM_016243	chr1	-	202931001	M	AATAAA	61.4	-9.9	-0.5	2.9	cytochrome b5 reductase 1	32.923	1.4	1.1	4	2.2
ZMPSTE24	mRNA	10269	NM_005857	chr1	+	40759680	M	AATAAA	5	25.3	2.9	2.9	zinc metallopeptidase (STE24 homolog, S. cerevisiae)	44.895	-2	-2.9	3	15.7
S100PBP	mRNA	64766	NM_022753	chr1	+	33324476	L	AATAAA	31.2	-31.2	-1.3	2.9	S100P binding protein	11.972	-1.4	-0.3	5	2.9
ITGB3BP	mRNA	23421	NM_001206739	chr1	-	63904160	L	AATAAA	3.8	19.7	1.2	2.9	integrin beta 3 binding protein (beta3-endonexin)	19.455	-1.7	-1	4	3.2
NR3C1	mRNA	2908	NM_001018077	chr5	-	142657499	F	AATAAA	69.7	4	0.1	2.9	nuclear receptor subfamily 3, group C, member 1 (glucocorticoid receptor)	24.692	1.6	1.4	2	33.3
NR3C1	mRNA	2908	NM_001018077	chr5	-	142653199	L	AATAAA	30.3	-4	-0.1	2.9	nuclear receptor subfamily 3, group C, member 1 (glucocorticoid receptor)	24.692	1.6	1.4	2	33.3
ALDH7A1	mRNA	501	NM_001201377	chr5	-	125880445	M	AATAAA	30.8	-28.4	-2.9	2.9	aldehyde dehydrogenase 7 family, member A1	19.455	1.5	0.8	4	3.5
C5orf24	mRNA	134553	NM_001135586	chr5	+	134192965	M	ATTAAA	44.4	30.6	0.3	2.9	chromosome 5 open reading frame 24	6.734	-2.5	-0.8	4	1.6
CENPH	mRNA	64946	NM_022909	chr5	+	68506184	L	AATAAA	69.2	-51.3	-2.9	2.9	centromere protein H	9.727	2.7	2.9	3	58.5
TTC33	mRNA	23548	NM_012382	chr5	-	40714577	M	AATAAA	33.3	3.1	0	2.9	tetratricopeptide repeat domain 33	6.734	1.1	0	4	0.9
C5orf28	mRNA	64417	NM_022483	chr5	-	43444779	M	AATAAA	100	0	0	2.9	chromosome 5 open reading frame 28	2.245	4.5	2	4	2
MED10	mRNA	84246	NM_032286	chr5	-	6372274	F	ATTAAA	63.4	-2.5	-0.1	2.9	mediator complex subunit 10	53.126	1.4	1.5	2	5.3
MED10	mRNA	84246	NM_032286	chr5	-	6372039	L	AATAAA	36.6	2.5	0.1	2.9	mediator complex subunit 10	53.126	1.4	1.5	2	5.3
CCPG1	mRNA	9236	NM_004748	chr15	-	55651037	F	AATAAA	14.3	85.7	2.9	2.9	cell cycle progression 1	5.238	1	0	7	1.8
DNAJC17	mRNA	55192	NM_018163	chr15	-	41060069	F	AATAAA	100	-14.3	-0.4	2.9	DnaJ (Hsp40) homolog, subfamily C, member 17	6.734	-1.4	-0.2	4	0.2
UACA	mRNA	55075	NM_001008224	chr15	-	70949272	F	AATAAA	73.9	-15.1	-0.9	2.9	uveal autoantigen with coiled-coil domains and ankyrin repeats	34.42	1	0	4	1.9
ANXA2	mRNA	302	NM_001136015	chr15	-	60677246	Ic	AATAAA	32.4	-6.3	-0.1	2.9	annexin A2	25.441	-1.6	-1.1	5	15.2
IGF1R	mRNA	3480	NM_000875	chr15	+	99507759	L	AATAAA	0	0	NA	2.9	insulin-like growth factor 1 receptor	6.734	-3.3	-1.1	8	5.2
POLR3H	mRNA	171568	NM_001018050	chr22	-	41924846	F	AATAAA	75	-30	-0.7	2.9	polymerase (RNA) III (DNA directed) polypeptide H (22.9kD)	5.986	2.3	1.2	7	4
RRP7A	mRNA	27341	NM_015703	chr22	-	42908561	F	Arich	96	-1.7	0	2.9	ribosomal RNA processing 7 homolog A (S. cerevisiae)	18.706	1.3	0.4	5	8.9
CCDC157	mRNA	550631	NM_001017437	chr22	+	30762396	Ic	NoPAS	66.7	-66.7	-2.9	2.9	coiled-coil domain containing 157	6.734	1.3	0.2	2	0.3
CCDC157	mRNA	550631	NM_001017437	chr22	+	30762771	Ic	ATTAAA	33.3	66.7	2.9	2.9	coiled-coil domain containing 157	6.734	1.3	0.2	2	0.3
RPS28	mRNA	6234	NM_001031	chr19	+	8388224	L	AATAAA	4.1	4.8	0.4	2.9	ribosomal protein S28	36.664	-1.2	-0.4	3	85.3
UBE2S	mRNA	27338	NM_014501	chr19	-	55896676	L	AATAAA	100	-100	-2.9	2.9	ubiquitin-conjugating enzyme E2S	3.741	1.3	0.1	5	3.1
PLEKHJ1	mRNA	55111	NM_018049	chr19	-	2230018	L	AATAAA	4.3	-4.3	-1.1	2.9	pleckstrin homology domain containing, family J member 1	52.378	1.1	0.3	3	27
SSC5D	mRNA	284297	NM_001144950	chr19	+	56007754	Ic	AATAAA	90.9	-15.9	-0.3	2.9	scavenger receptor cysteine rich domain containing (5 domains)	8.231	-1.5	-0.4	5	8.1
BRD4	mRNA	23476	NM_058243	chr19	-	15347649	F	AATAAA	58.4	-22.9	-2.9	2.9	bromodomain containing 4	66.595	1.3	1	3	1
ZNF526	mRNA	116115	NM_133444	chr19	+	42731205	F	NoPAS	57.1	-7.1	0	2.9	zinc finger protein 526	5.238	-1.3	-0.1	6	1.2
ELAVL1	mRNA	1994	NM_001419	chr19	-	8024079	M	AATAAA	17.5	-0.3	0	2.9	ELAV (embryonic lethal, abnormal vision, Drosophila)-like 1 (Hu antigen R)	47.14	-1.2	-0.5	5	0.5
IL11	mRNA	3589	NM_000641	chr19	-	55876929	F	ATTAAA	91.4	3.2	0.4	2.9	interleukin 11	60.609	2.3	9.9	2	999
IL11	mRNA	3589	NM_000641	chr19	-	55875755	L	AATAAA	8.6	-3.2	-0.4	2.9	interleukin 11	60.609	2.3	9.9	2	999
LOC100506548	lncRNA	100506548	NR_037665	chr5	-	40827696	F	NoPAS	0	0	NA	2.9	uncharacterized LOC100506548	2.245	-3.3	-0.4	6	9.9
CTD-2201E18.3	lncRNA	NA	ENST00000314957	chr5	-	43006835	M	AATAAA	0	0	NA	2.9		1.497	2.3	0.3	5	4.5
CDS2	mRNA	8760	NM_003818	chr20	+	5171989	M	ATTAAA	7.1	19	0.7	2.8	CDP-diacylglycerol synthase (phosphatidate cytidylyltransferase) 2	10.476	1.5	0.6	6	0.6
ITCH	mRNA	83737	NM_031483	chr20	+	33098313	M	AATAAA	0	0	NA	2.8	itchy E3 ubiquitin protein ligase homolog (mouse)	5.238	-1.9	-0.4	5	2
SERINC3	mRNA	10955	NM_006811	chr20	-	43127850	F	AATAAA	79.1	-0.4	0	2.8	serine incorporator 3	275.357	1.2	2.4	2	83.6
SERINC3	mRNA	10955	NM_006811	chr20	-	43126082	L	AATAAA	20.9	0.4	0	2.8	serine incorporator 3	275.357	1.2	2.4	2	83.6
PHF20	mRNA	51230	NM_016436	chr20	+	34543290	L	AATAAA	31.4	-31.4	-2.8	2.8	PHD finger protein 20	26.189	-1.5	-1	7	3.3
PLXNB3	mRNA	5365	NM_001163257	chrX	+	153027144	UA	OtherPAS	66.7	-55.6	-0.9	2.8	plexin B3	2.245	2.7	0.8	3	11.1
YIPF6	mRNA	286451	NM_173834	chrX	+	67751907	F	NoPAS	8.3	-8.3	-0.6	2.8	Yip1 domain family, member 6	26.937	-1.5	-0.9	11	4.5
OFD1	mRNA	8481	NM_003611	chrX	+	13787472	M	AATAAA	0	0	NA	2.8	oral-facial-digital syndrome 1	2.245	-1.7	-0.2	4	0.3
DSEL	mRNA	92126	NM_032160	chr18	-	65164967	L	ATTAAA	0	0	NA	2.8	dermatan sulfate epimerase-like	7.483	1.7	0.7	10	3
PIK3C3	mRNA	5289	NM_002647	chr18	+	39661632	L	OtherPAS	5.1	26.4	2.8	2.8	phosphoinositide-3-kinase, class 3	29.182	1.3	0.5	6	0.8
CNOT7	mRNA	29883	NM_013354	chr8	-	17099692	Ic	AATAAA	0	22.2	0	2.8	CCR4-NOT transcription complex, subunit 7	1.497	4.1	1.2	6	1.2
UBE2W	mRNA	55284	NM_001001481	chr8	-	74702847	M	AATAAA	53.8	1.4	0	2.8	ubiquitin-conjugating enzyme E2W (putative)	9.727	2	1.4	6	4.2
ASPH	mRNA	444	NM_004318	chr8	-	62596597	Ic	NoPAS	7.5	-4.6	-0.7	2.8	aspartate beta-hydroxylase	39.657	2.3	7.3	8	22.7
PTK2	mRNA	5747	NM_001199649	chr8	-	141668501	S	ATTAAA	92.1	-30.2	-2.8	2.8	PTK2 protein tyrosine kinase 2	28.434	-1	0	3	1.1
PAG1	mRNA	55824	NM_018440	chr8	-	81883692	M	OtherPAS	16.7	0	0	2.8	phosphoprotein associated with glycosphingolipid microdomains 1	8.979	-2.2	-0.8	6	1.6
FDFT1	mRNA	2222	NM_004462	chr8	+	11702763	L	AATAAA	0	7.1	1	2.8	farnesyl-diphosphate farnesyltransferase 1	41.902	-2.2	-3.4	4	17.3
GLI4	mRNA	2738	NM_138465	chr8	+	144359101	F	AATAAA	100	-57.9	-2.8	2.8	GLI family zinc finger 4	8.231	1.6	0.6	4	3.9
POLR3D	mRNA	661	NM_001722	chr8	+	22108680	F	AATAAA	58.3	-25	-0.6	2.8	polymerase (RNA) III (DNA directed) polypeptide D, 44kDa	8.979	1.4	0.3	8	10.8
DCAF13	mRNA	25879	NM_015420	chr8	+	104455203	F	AATAAA	44	-14.4	-1.6	2.8	DDB1 and CUL4 associated factor 13	86.797	-1.2	-0.7	3	18
GRSF1	mRNA	2926	NM_002092	chr4	-	71686306	M	ATTAAA	2.5	7.8	0.7	2.8	G-rich RNA sequence binding factor 1	29.93	-1.1	-0.2	7	0.9
HMGB2	mRNA	3148	NM_002129	chr4	-	174253343	F	NoPAS	0	2.9	0	2.8	high mobility group box 2	7.483	3.2	3.1	5	36.6
TMEM165	mRNA	55858	NM_018475	chr4	+	56291806	F	OtherPAS	62.5	-55.4	-2.8	2.8	transmembrane protein 165	17.958	-1.9	-1.1	4	10.4
SPCS3	mRNA	60559	NM_021928	chr4	+	177265324	L	NoPAS	0	0	NA	2.8	signal peptidase complex subunit 3 homolog (S. cerevisiae)	47.888	2.2	7.8	4	12.4
COL4A2	mRNA	1284	NM_001846	chr13	+	110983372	Is	AATAAA	0	35.3	2.8	2.8	collagen, type IV, alpha 2	14.965	2.3	2.9	3	2.9
POMP	mRNA	51371	NM_015932	chr13	+	29252336	F	ATTAAA	60	3.6	0.2	2.8	proteasome maturation protein	67.343	1.1	0.2	4	19.2
PDF	mRNA	64146	NM_022341	chr16	-	69362524	M	OtherPAS	22.9	4.6	0.1	2.8	peptide deformylase (mitochondrial)	26.189	1	0	7	1.3
CPNE7	mRNA	27132	NM_014427	chr16	+	89648751	Ic	ATTAAA	18.2	1.8	0	2.8	copine VII	16.462	1	0	4	1
FAM192A	mRNA	80011	NM_024946	chr16	-	57187779	M	OtherPAS	8.9	-2.5	-0.4	2.8	family with sequence similarity 192, member A	126.455	1	0	6	19.1
AXIN1	mRNA	8312	NM_003502	chr16	-	356301	Ic	NoPAS	0	100	2.8	2.8	axin 1	10.476	-5.2	-2.2	2	2.2
AXIN1	mRNA	8312	NM_003502	chr16	-	337440	S	AATAAA	100	-100	-2.8	2.8	axin 1	10.476	-5.2	-2.2	2	2.2
CARHSP1	mRNA	23589	NM_001042476	chr16	-	8948770	F	ATTAAA	9.6	0.5	0	2.8	calcium regulated heat stable protein 1, 24kDa	85.301	1.4	2.5	2	7.7
CARHSP1	mRNA	23589	NM_001042476	chr16	-	8946804	L	AATAAA	90.4	-0.5	0	2.8	calcium regulated heat stable protein 1, 24kDa	85.301	1.4	2.5	2	7.7
RFWD3	mRNA	55159	NM_018124	chr16	-	74683247	Ic	AATAAA	0	0	NA	2.8	ring finger and WD repeat domain 3	5.238	1.7	0.4	8	13.3
ERLIN1	mRNA	10613	NM_006459	chr10	-	101909851	L	AATAAA	85.1	13.9	2.8	2.8	ER lipid raft associated 1	35.168	1.9	3.7	3	3.7
BUB3	mRNA	9184	NM_004725	chr10	+	124923533	M	AATAAA	29.9	-19.1	-2.8	2.8	budding uninhibited by benzimidazoles 3 homolog (yeast)	80.063	-1.4	-1.8	3	42.3
BICC1	mRNA	80114	NM_001080512	chr10	+	60583352	Ic	AATAAA	16.7	23.3	0.2	2.8	bicaudal C homolog 1 (Drosophila)	4.49	1.5	0.3	7	1.7
REEP3	mRNA	221035	NM_001001330	chr10	+	65384337	E	AATAAA	55	14.7	2.8	2.8	receptor accessory protein 3	187.812	-1.4	-3.7	3	3.7
RUNX1	mRNA	861	NM_001001890	chr21	-	36160098	L	AATAAA	81.2	-1.2	0	2.8	runt-related transcription factor 1	47.888	-1.3	-0.8	5	4.5
HLCS	mRNA	3141	NM_001242784	chr21	-	38227152	Ic	OtherPAS	10.5	3.8	0	2.8	holocarboxylase synthetase (biotin-(proprionyl-CoA-carboxylase (ATP-hydrolysing)) ligase)	14.217	-1.5	-0.5	10	0.9
SUMO3	mRNA	6612	NM_006936	chr21	-	46226630	F	NoPAS	33.8	9.1	0.6	2.8	SMT3 suppressor of mif two 3 homolog 3 (S. cerevisiae)	55.371	1.1	0.3	3	27.2
COL6A1	mRNA	1291	NM_001848	chr21	+	47424016	F	OtherPAS	88.3	-1.2	-0.3	2.8	collagen, type VI, alpha 1	416.029	1.3	5.5	2	999
COL6A1	mRNA	1291	NM_001848	chr21	+	47424962	L	AATAAA	11.7	1.2	0.3	2.8	collagen, type VI, alpha 1	416.029	1.3	5.5	2	999
SHC3	mRNA	53358	NM_016848	chr9	-	91620686	L	AATAAA	0	0	NA	2.8	SHC (Src homology 2 domain containing) transforming protein 3	71.832	2.3	12.2	6	12.2
NOTCH1	mRNA	4851	NM_017617	chr9	-	139388896	L	AATAAA	0	33.3	0.5	2.8	notch 1	4.49	-2.2	-0.5	4	0.9
C9orf5	mRNA	23731	NM_032012	chr9	-	111782466	F	NoPAS	35	-35	-2.8	2.8	chromosome 9 open reading frame 5	14.965	1.2	0.2	5	0.5
STX17	mRNA	55014	NM_017919	chr9	+	102731769	M	NoPAS	16.7	-16.7	-2.8	2.8	syntaxin 17	26.937	1.7	1.8	11	1.8
PRPF4	mRNA	9128	NM_004697	chr9	+	116054987	F	Arich	40	-36.7	-2.8	2.8	PRP4 pre-mRNA processing factor 4 homolog (yeast)	14.965	1.4	0.5	4	5.3
ERMP1	mRNA	79956	NM_024896	chr9	-	5803071	Ic	ATTAAA	0	0	NA	2.8	endoplasmic reticulum metallopeptidase 1	11.224	-4.2	-2	5	2
PRRC2B	mRNA	84726	NM_013318	chr9	+	134373539	F	AATAAA	28.6	4.7	0	2.8	proline-rich coiled-coil 2B	5.238	-2.6	-0.7	4	0.7
SMC2	mRNA	10592	NM_001042550	chr9	+	106903700	M	AATAAA	0	8.7	0	2.8	structural maintenance of chromosomes 2	3.741	4.2	2.7	8	9.8
CALU	mRNA	813	NM_001199672	chr7	+	128413311	M	ATTAAA	7.4	10.8	2.8	2.8	calumenin	140.672	-1	-0.1	7	75
CBLL1	mRNA	79872	NM_024814	chr7	+	107402112	S	AATAAA	1.8	7.3	1.6	2.8	Cas-Br-M (murine) ecotropic retroviral transforming sequence-like 1	83.804	1.1	0.2	3	8.1
ZNF862	mRNA	643641	NM_001099220	chr7	+	149564568	S	AATAAA	22.5	35.6	2.8	2.8	zinc finger protein 862	29.93	-1	0	4	2.6
ORAI2	mRNA	80228	NM_001126340	chr7	+	102097272	L	AATAAA	3.3	20.8	1.9	2.8	ORAI calcium release-activated calcium modulator 2	22.448	2.5	5.1	6	5.1
EIF2AK1	mRNA	27102	NM_014413	chr7	-	6063462	M	AATAAA	94.1	-31.6	-2.8	2.8	eukaryotic translation initiation factor 2-alpha kinase 1	25.441	1.1	0.1	4	1.1
TMEM168	mRNA	64418	NM_022484	chr7	-	112406710	M	AATAAA	61.1	-61.1	-2.8	2.8	transmembrane protein 168	13.469	-2	-1.1	10	1.1
NRXN2	mRNA	9379	NM_015080	chr11	-	64373652	S	Arich	100	-100	-0.6	2.8	neurexin 2	0.748	2.7	0.2	4	1
ARRB1	mRNA	408	NM_004041	chr11	-	74976768	F	Arich	76	-42.7	-2.8	2.8	arrestin, beta 1	18.706	1.2	0.3	6	0.5
RRP8	mRNA	23378	NM_015324	chr11	-	6621152	F	AATAAA	93.3	-5.4	-0.3	2.8	ribosomal RNA processing 8, methyltransferase, homolog (yeast)	44.895	-2	-2.9	4	2.9
C11orf24	mRNA	53838	NM_022338	chr11	-	68028967	F	NoPAS	8.1	10.1	0.4	2.8	chromosome 11 open reading frame 24	27.685	-1.9	-1.6	4	5.2
BIRC2	mRNA	329	NM_001166	chr11	+	102219414	E	AATAAA	54.3	-30	-2.8	2.8	baculoviral IAP repeat containing 2	34.42	1.4	1	3	1.8
BAIAP2	mRNA	10458	NM_006340	chr17	+	79090025	F	AATAAA	50	-31.5	-1.2	2.8	BAI1-associated protein 2	10.476	1.7	0.9	5	22.3
SMARCE1	mRNA	6605	NM_003079	chr17	-	38784969	S	OtherPAS	62.5	-10.3	-0.4	2.8	SWI/SNF related, matrix associated, actin dependent regulator of chromatin, subfamily e, member 1	29.93	1	0	4	7
RNF157	mRNA	114804	NM_052916	chr17	-	74167714	Ic	AATAAA	100	-95.7	-2.8	2.8	ring finger protein 157	2.245	6.9	3.7	3	3.7
SKA2	mRNA	348235	NM_182620	chr17	-	57188663	M	AATAAA	11	-10.2	-2.8	2.8	spindle and kinetochore associated complex subunit 2	54.622	1.6	2.8	8	16.9
CALCOCO2	mRNA	10241	NM_005831	chr17	+	46941240	M	AATAAA	86.1	-3.6	-0.7	2.8	calcium binding and coiled-coil domain 2	226.721	1.1	0.9	4	15.1
RAI1	mRNA	10743	NM_030665	chr17	+	17714767	S	AATAAA	0	100	0.5	2.8	retinoic acid induced 1	0.748	1.8	0	3	1
PHB	mRNA	5245	NM_002634	chr17	-	47482197	F	AATAAA	8.1	-8.1	-0.8	2.8	prohibitin	46.392	-2.4	-4.1	2	77
PHB	mRNA	5245	NM_002634	chr17	-	47481414	L	AATAAA	91.9	8.1	0.8	2.8	prohibitin	46.392	-2.4	-4.1	2	77
COX16	mRNA	51241	NM_016468	chr14	-	70792993	F	AATAAA	0	0	NA	2.8	COX16 cytochrome c oxidase assembly homolog (S. cerevisiae)	4.49	-2.2	-0.5	4	5.9
FAM177A1	mRNA	283635	NM_001079519	chr14	+	35550931	M	AATAAA	21.4	-6	0	2.8	family with sequence similarity 177, member A1	10.476	-1.2	-0.2	4	0.4
MAP3K12	mRNA	7786	NM_001193511	chr12	-	53874910	F	OtherPAS	80	-80	-2.8	2.8	mitogen-activated protein kinase kinase kinase 12	3.741	2.3	1	6	1.7
PCBP2	mRNA	5094	NM_005016	chr12	+	53873398	M	ATTAAA	27.6	5.4	2.8	2.8	poly(rC) binding protein 2	1216.66	-1.4	-18.5	5	38.9
NCOR2	mRNA	9612	NM_006312	chr12	-	124861943	Ic	OtherPAS	25.9	-4.5	0	2.8	nuclear receptor corepressor 2	20.203	-2.1	-1.7	5	5.3
WSB2	mRNA	55884	NM_018639	chr12	-	118471997	F	OtherPAS	32	-20.1	-1.8	2.8	WD repeat and SOCS box containing 2	37.413	1.1	0.1	10	33.2
GLIPR1	mRNA	11010	NM_006851	chr12	+	75895633	M	AATAAA	0	19.2	0.5	2.8	GLI pathogenesis-related 1	5.986	2.9	2.3	5	31.3
NUP37	mRNA	79023	NM_024057	chr12	-	102467967	F	AATAAA	100	-50	-1.9	2.8	nucleoporin 37kDa	12.72	-3.1	-1.9	2	13
NUP37	mRNA	79023	NM_024057	chr12	-	102466881	L	AATAAA	0	50	1.9	2.8	nucleoporin 37kDa	12.72	-3.1	-1.9	2	13
IL36RN	mRNA	26525	NM_012275	chr2	+	113822321	L	OtherPAS	0	1.1	0.5	2.8	interleukin 36 receptor antagonist	132.441	2.3	23	5	23
TGOLN2	mRNA	10618	NM_001206840	chr2	-	85538790	M	AATAAA	0	0	NA	2.8	trans-golgi network protein 2	8.979	-1.3	-0.3	6	5.3
ZAK	mRNA	51776	NM_133646	chr2	+	174086306	F	AATAAA	16.7	55.7	2.8	2.8	sterile alpha motif and leucine zipper containing kinase AZK	8.979	2.2	1.6	6	2.8
TEX261	mRNA	113419	NM_144582	chr2	-	71204014	L	NoPAS	0	0	NA	2.8	testis expressed 261	8.231	-1	0	3	15.1
ANKZF1	mRNA	55139	NM_018089	chr2	+	220099470	Ic	AATAAA	25.7	-23.6	-2.8	2.8	ankyrin repeat and zinc finger domain containing 1	26.189	1.2	0.4	2	2.6
ANKZF1	mRNA	55139	NM_018089	chr2	+	220101373	S	AATAAA	74.3	23.6	2.8	2.8	ankyrin repeat and zinc finger domain containing 1	26.189	1.2	0.4	2	2.6
BAZ2B	mRNA	29994	NM_013450	chr2	-	160408171	Ic	AATAAA	50	-50	-2.8	2.8	bromodomain adjacent to zinc finger domain, 2B	5.986	2.9	2.3	12	2.3
TMEM185B	mRNA	79134	NM_024121	chr2	-	120979080	F	Arich	15.2	-9.9	-2.8	2.8	transmembrane protein 185B	108.497	1.6	5.8	5	5.8
SOD2	mRNA	6648	NM_000636	chr6	-	160103341	M	OtherPAS	2.3	-1.3	-1.2	2.8	superoxide dismutase 2, mitochondrial	929.33	-2.3	-65	4	65
ABCF1	mRNA	23	NM_001025091	chr6	+	30559089	F	AATAAA	90.9	3.1	0.9	2.8	ATP-binding cassette, sub-family F (GCN20), member 1	336.714	-1.7	-11.2	2	11.2
ABCF1	mRNA	23	NM_001025091	chr6	+	30559208	L	OtherPAS	9.1	-3.1	-0.9	2.8	ATP-binding cassette, sub-family F (GCN20), member 1	336.714	-1.7	-11.2	2	11.2
OGFRL1	mRNA	79627	NM_024576	chr6	+	72015344	M	OtherPAS	26.7	-11.3	-0.2	2.8	opioid growth factor receptor-like 1	22.448	-2.6	-2.5	6	3.6
CD109	mRNA	135228	NM_133493	chr6	+	74538037	L	AATAAA	13.3	20	0.9	2.8	CD109 molecule	22.448	-1.1	-0.2	5	3.2
SYNCRIP	mRNA	10492	NM_001159677	chr6	-	86322292	F	AATAAA	74	-20.5	-2.8	2.8	synaptotagmin binding, cytoplasmic RNA interacting protein	71.832	1.3	1.5	6	36.7
SYNCRIP	mRNA	10492	NM_001159677	chr6	-	86320200	M	ATTAAA	3.1	1.8	0.1	2.8	synaptotagmin binding, cytoplasmic RNA interacting protein	71.832	1.3	1.5	6	36.7
SNX9	mRNA	51429	NM_016224	chr6	+	158363778	Ic	AATAAA	31.8	-4.1	-0.1	2.8	sorting nexin 9	63.602	-1.4	-1.6	4	87.1
EIF4G1	mRNA	1981	NM_182917	chr3	+	184052843	F	AATAAA	13.2	2.6	0.3	2.8	eukaryotic translation initiation factor 4 gamma, 1	147.406	-1.6	-5	2	66.8
EIF4G1	mRNA	1981	NM_182917	chr3	+	184053141	L	ATTAAA	86.8	-2.6	-0.3	2.8	eukaryotic translation initiation factor 4 gamma, 1	147.406	-1.6	-5	2	66.8
IL1RAP	mRNA	3556	NM_001167928	chr3	+	190363796	Ic	AATAAA	90.9	-56.5	-2.8	2.8	interleukin 1 receptor accessory protein	8.231	2.6	2.3	9	3.4
LRIG1	mRNA	26018	NM_015541	chr3	-	66430372	F	Arich	16.7	-9.3	-1	2.8	leucine-rich repeats and immunoglobulin-like domains 1	40.406	1.8	3.4	2	23.2
LRIG1	mRNA	26018	NM_015541	chr3	-	66429221	L	AATAAA	83.3	9.3	1	2.8	leucine-rich repeats and immunoglobulin-like domains 1	40.406	1.8	3.4	2	23.2
HEG1	mRNA	57493	NM_020733	chr3	-	124684554	L	AATAAA	80.2	14.3	2.8	2.8	HEG homolog 1 (zebrafish)	79.315	-1.1	-0.2	3	20.6
TRA2B	mRNA	6434	NM_004593	chr3	-	185635116	F	AATAAA	72.4	-35.9	-2.8	2.8	transformer 2 beta homolog (Drosophila)	21.699	2	2.6	5	9.8
KPNA1	mRNA	3836	NM_002264	chr3	-	122145616	F	AATAAA	11.5	-11.5	-2.8	2.8	karyopherin alpha 1 (importin alpha 5)	65.098	-1.3	-0.8	10	10.6
PDE12	mRNA	201626	NM_177966	chr3	+	57552190	L	OtherPAS	0	0	NA	2.8	phosphodiesterase 12	7.483	1.9	1	6	4.2
[truncated: 38,334 more rows]
